# Supplementary material for: Effects of starch-based superabsorbent polymer on survival and physiology of Pinus ponderosa seedlings exposed to severe drought stress
Source: Research Square preprint supplement (doi:10.21203/rs.3.rs-7208918/v1), 2025-08-08
Supplement: Supplementary file 1 [file 2e965cbfc76b2ce14c76c458.pdf]

Effects of starch-based superabsorbent polymer on survival and physiology of *Pinus ponderosa* seedlings  
exposed to severe drought stress

Kara K. Sanghera, Christopher E. Looney, Courtney A. Canning, Jessica W. Wright

Corresponding author: Kara K. Sanghera, [karakaur01@ucla.edu](mailto:karakaur01@ucla.edu)

### **Supplemental Methods 1: Seedling Selection Criteria**

We selected 500 out of the 860 obtained seedlings using the following criteria:

1. Exclude any seedlings that are dead or have significant browning and dieback,
2. Exclude any seedlings with a basal stem diameter under 2 millimeters,
3. Exclude any seedlings that have a significant amount of water mold, scale, or other significant fungal presence,
4. Exclude any seedlings with codominant or multiple stems,
5. Exclude any seedlings with a severed apical bud.

Applying these conditions, we chose the most vigorous-looking seedlings until we reached 500 seedlings, then composted the remaining plants.
