# Supplementary material for: Effects of starch-based superabsorbent polymer on survival and physiology of Pinus ponderosa seedlings exposed to severe drought stress
Source: Research Square preprint supplement (doi:10.21203/rs.3.rs-7208918/v1), 2025-08-08
Supplement: Supplementary file 1 [file 608352318068b5c2245b8ff1.xlsx]

## Sheet: all_weeks_data
ID	week_dead	treatment	date_0	surv_0	ht_0	diam_0	date_01	surv_01	date_02	surv_02	ht_02	diam_02	date_03	surv_03	date_04	surv_04	ht_04	diam_04	date_05	surv_05	date_06	surv_06	ht_06	diam_06	date_07	surv_07	date_08	surv_08	ht_08	diam_08	date_09	surv_09	date_10	surv_10	ht_10	diam_10	date_11	surv_11	date_12	surv_12	ht_12	diam_12	date_13	surv_13
C-01-01	8	Control	2024-06-10	0	32	6.1	2024-06-17	0	2024-06-24	0	36	6.2	2024-07-01	0	2024-07-10	0	36	6.32	2024-07-17	0	2024-07-22	0	36	6.36	2024-07-29	0	2024-08-06	1	36	6.36	2024-08-12	1	2024-08-19	1	36	6.36	2024-08-26	1	2024-09-03	1			2025-09-10	1
C-01-02	8	Control	2024-06-10	0	37	4.41	2024-06-17	0	2024-06-24	0	37	4.55	2024-07-01	0	2024-07-10	0	37.5	4.57	2024-07-17	0	2024-07-22	0	37.5	4.575	2024-07-29	0	2024-08-06	1	37.5	4.575	2024-08-12	1	2024-08-19	1	37.5	4.58	2024-08-26	1	2024-09-03	1			2025-09-10	1
C-01-03	8	Control	2024-06-10	0	34.5	4.9	2024-06-17	0	2024-06-24	0	35	5	2024-07-01	0	2024-07-10	0	35.5	5.02	2024-07-17	0	2024-07-22	0	35.5	5.035	2024-07-29	0	2024-08-06	1	35.5	5.035	2024-08-12	1	2024-08-19	1	35.5	5.035	2024-08-26	1	2024-09-03	1			2025-09-10	1
C-01-04	9	Control	2024-06-10	0	35	4.68	2024-06-17	0	2024-06-24	0	35	5.03	2024-07-01	0	2024-07-10	0	35	5.14	2024-07-17	0	2024-07-22	0	35	5.195	2024-07-29	0	2024-08-06	0	35	5.195	2024-08-12	1	2024-08-19	1	35	5.195	2024-08-26	1	2024-09-03	1			2025-09-10	1
C-01-05	8	Control	2024-06-10	0	36	4.3	2024-06-17	0	2024-06-24	0	36	4.5	2024-07-01	0	2024-07-10	0	36.5	4.52	2024-07-17	0	2024-07-22	0	36.5	4.66	2024-07-29	0	2024-08-06	1	36.5	4.66	2024-08-12	1	2024-08-19	1	36.5	4.66	2024-08-26	1	2024-09-03	1			2025-09-10	1
C-02-06	10	Control	2024-06-10	0	42	5.5	2024-06-17	0	2024-06-24	0	42	5.52	2024-07-01	0	2024-07-10	0	42	5.55	2024-07-17	0	2024-07-22	0	42	5.83	2024-07-29	0	2024-08-06	0	42	5.84	2024-08-12	0	2024-08-19	1	42	5.84	2024-08-26	1	2024-09-03	1			2025-09-10	1
C-02-07	10	Control	2024-06-10	0	34	4.91	2024-06-17	0	2024-06-24	0	34	5.08	2024-07-01	0	2024-07-10	0	34.5	5.4	2024-07-17	0	2024-07-22	0	34.5	5.4	2024-07-29	0	2024-08-06	0	34.5	5.4	2024-08-12	0	2024-08-19	1	34.5	5.4	2024-08-26	1	2024-09-03	1			2025-09-10	1
C-02-08	10	Control	2024-06-10	0	36	5.48	2024-06-17	0	2024-06-24	0	36	5.93	2024-07-01	0	2024-07-10	0	36	5.9	2024-07-17	0	2024-07-22	0	36	5.9	2024-07-29	0	2024-08-06	0	36	5.91	2024-08-12	0	2024-08-19	1	36	5.91	2024-08-26	1	2024-09-03	1			2025-09-10	1
C-02-09	8	Control	2024-06-10	0	34.5	4.4	2024-06-17	0	2024-06-24	0	34.5	4.74	2024-07-01	0	2024-07-10	0	35	4.76	2024-07-17	0	2024-07-22	0	35	4.76	2024-07-29	0	2024-08-06	1	35	4.76	2024-08-12	1	2024-08-19	1	35	4.76	2024-08-26	1	2024-09-03	1			2025-09-10	1
C-02-10	10	Control	2024-06-10	0	34	4.65	2024-06-17	0	2024-06-24	0	34	5.02	2024-07-01	0	2024-07-10	0	34	5.03	2024-07-17	0	2024-07-22	0	34	5.245	2024-07-29	0	2024-08-06	0	34	5.245	2024-08-12	0	2024-08-19	1	34	5.245	2024-08-26	1	2024-09-03	1			2025-09-10	1
C-03-11	10	Control	2024-06-10	0	30	3.6	2024-06-17	0	2024-06-24	0	30	3.66	2024-07-01	0	2024-07-10	0	30	3.68	2024-07-17	0	2024-07-22	0	30	3.74	2024-07-29	0	2024-08-06	0	30	3.76	2024-08-12	0	2024-08-19	1	30	3.76	2024-08-26	1	2024-09-03	1			2025-09-10	1
C-03-12	10	Control	2024-06-10	0	28.5	3.02	2024-06-17	0	2024-06-24	0	29	3.3	2024-07-01	0	2024-07-10	0	29	3.5	2024-07-17	0	2024-07-22	0	29	3.81	2024-07-29	0	2024-08-06	0	29	3.82	2024-08-12	0	2024-08-19	1	29	3.82	2024-08-26	1	2024-09-03	1			2025-09-10	1
C-03-13	9	Control	2024-06-10	0	43.5	5.34	2024-06-17	0	2024-06-24	0	44	5.6	2024-07-01	0	2024-07-10	0	44	5.55	2024-07-17	0	2024-07-22	0	44	5.57	2024-07-29	0	2024-08-06	0	44	5.6	2024-08-12	1	2024-08-19	1	44	5.6	2024-08-26	1	2024-09-03	1			2025-09-10	1
C-03-14	9	Control	2024-06-10	0	34.5	4.25	2024-06-17	0	2024-06-24	0	34.5	4.45	2024-07-01	0	2024-07-10	0	34.5	4.89	2024-07-17	0	2024-07-22	0	34.5	4.99	2024-07-29	0	2024-08-06	0	34.5	4.98	2024-08-12	1	2024-08-19	1	34.5	4.98	2024-08-26	1	2024-09-03	1			2025-09-10	1
C-03-15	9	Control	2024-06-10	0	21.5	3.85	2024-06-17	0	2024-06-24	0	21.5	4.3	2024-07-01	0	2024-07-10	0	21.5	4.29	2024-07-17	0	2024-07-22	0	21.5	4.3	2024-07-29	0	2024-08-06	0	21.5	4.3	2024-08-12	1	2024-08-19	1	21.5	4.3	2024-08-26	1	2024-09-03	1			2025-09-10	1
C-04-16	9	Control	2024-06-10	0	31	3.79	2024-06-17	0	2024-06-24	0	31	4.32	2024-07-01	0	2024-07-10	0	31	4.4	2024-07-17	0	2024-07-22	0	31	4.45	2024-07-29	0	2024-08-06	0	31	4.45	2024-08-12	1	2024-08-19	1	31	4.45	2024-08-26	1	2024-09-03	1			2025-09-10	1
C-04-17	8	Control	2024-06-10	0	19	4.07	2024-06-17	0	2024-06-24	0	19	4.11	2024-07-01	0	2024-07-10	0	19	4.15	2024-07-17	0	2024-07-22	0	19	4.22	2024-07-29	0	2024-08-06	1	19	4.24	2024-08-12	1	2024-08-19	1	19	4.24	2024-08-26	1	2024-09-03	1			2025-09-10	1
C-04-18	8	Control	2024-06-10	0	34	4.86	2024-06-17	0	2024-06-24	0	35	4.98	2024-07-01	0	2024-07-10	0	35.5	5	2024-07-17	0	2024-07-22	0	35.5	5.07	2024-07-29	0	2024-08-06	1	35.5	5.07	2024-08-12	1	2024-08-19	1	35.5	5.07	2024-08-26	1	2024-09-03	1			2025-09-10	1
C-04-19	9	Control	2024-06-10	0	35.5	4.83	2024-06-17	0	2024-06-24	0	35.5	5	2024-07-01	0	2024-07-10	0	36	4.98	2024-07-17	0	2024-07-22	0	36	4.28	2024-07-29	0	2024-08-06	0	36	4.28	2024-08-12	1	2024-08-19	1	36	4.28	2024-08-26	1	2024-09-03	1			2025-09-10	1
C-05-21	8	Control	2024-06-10	0	30	3.72	2024-06-17	0	2024-06-24	0	30	3.77	2024-07-01	0	2024-07-10	0	30	4.9	2024-07-17	0	2024-07-22	0	30	3.91	2024-07-29	0	2024-08-06	1	30	3.91	2024-08-12	1	2024-08-19	1	30	3.91	2024-08-26	1	2024-09-03	1			2025-09-10	1
C-05-22	11	Control	2024-06-10	0	28	4.34	2024-06-17	0	2024-06-24	0	29.5	4.75	2024-07-01	0	2024-07-10	0	29.5	4.79	2024-07-17	0	2024-07-22	0	29.5	4.775	2024-07-29	0	2024-08-06	0	29.5	4.775	2024-08-12	0	2024-08-19	0	29.5	4.775	2024-08-26	1	2024-09-03	1			2025-09-10	1
C-05-23	11	Control	2024-06-10	0	26	4.06	2024-06-17	0	2024-06-24	0	27	4.27	2024-07-01	0	2024-07-10	0	27	4.33	2024-07-17	0	2024-07-22	0	27	4.51	2024-07-29	0	2024-08-06	0	27	4.54	2024-08-12	0	2024-08-19	0	27	4.54	2024-08-26	1	2024-09-03	1			2025-09-10	1
C-05-24	7	Control	2024-06-10	0	25	2.75	2024-06-17	0	2024-06-24	0	27.5	4.16	2024-07-01	0	2024-07-10	0	28	4.5	2024-07-17	0	2024-07-22	0	28	4.51	2024-07-29	1	2024-08-06	1	28.5	4.5	2024-08-12	1	2024-08-19	1			2024-08-26	1	2024-09-03	1			2025-09-10	1
C-05-25	10	Control	2024-06-10	0	21	4.3	2024-06-17	0	2024-06-24	0	26	4.7	2024-07-01	0	2024-07-10	0	26	4.71	2024-07-17	0	2024-07-22	0	26.5	4.89	2024-07-29	0	2024-08-06	0	26.5	4.97	2024-08-12	0	2024-08-19	1	26.5	4.97	2024-08-26	1	2024-09-03	1			2025-09-10	1
C-06-26	7	Control	2024-06-10	0	35	3.08	2024-06-17	0	2024-06-24	0	35	4.61	2024-07-01	0	2024-07-10	0	35	4.66	2024-07-17	0	2024-07-22	0	35	4.75	2024-07-29	1	2024-08-06	1	35	4.75	2024-08-12	1	2024-08-19	1			2024-08-26	1	2024-09-03	1			2025-09-10	1
C-06-27	8	Control	2024-06-10	0	28.5	2.35	2024-06-17	0	2024-06-24	0	29	2.65	2024-07-01	0	2024-07-10	0	29	3.44	2024-07-17	0	2024-07-22	0	29	3.58	2024-07-29	0	2024-08-06	1	29	3.58	2024-08-12	1	2024-08-19	1	29	3.58	2024-08-26	1	2024-09-03	1			2025-09-10	1
C-06-28	9	Control	2024-06-10	0	38	3.87	2024-06-17	0	2024-06-24	0	38	4.46	2024-07-01	0	2024-07-10	0	38	4.75	2024-07-17	0	2024-07-22	0	38	5.06	2024-07-29	0	2024-08-06	0	38	5.06	2024-08-12	1	2024-08-19	1	38	5.06	2024-08-26	1	2024-09-03	1			2025-09-10	1
C-06-29	7	Control	2024-06-10	0	35	4.15	2024-06-17	0	2024-06-24	0	35.5	4.68	2024-07-01	0	2024-07-10	0	35	5.06	2024-07-17	0	2024-07-22	0	35	5.1	2024-07-29	1	2024-08-06	1	35	5.11	2024-08-12	1	2024-08-19	1			2024-08-26	1	2024-09-03	1			2025-09-10	1
C-06-30	11	Control	2024-06-10	0	27.5	3.76	2024-06-17	0	2024-06-24	0	27.5	4.08	2024-07-01	0	2024-07-10	0	28	4.6	2024-07-17	0	2024-07-22	0	28	4.565	2024-07-29	0	2024-08-06	0	28	4.565	2024-08-12	0	2024-08-19	0	28	4.565	2024-08-26	1	2024-09-03	1			2025-09-10	1
C-07-31	8	Control	2024-06-10	0	28.5	4.25	2024-06-17	0	2024-06-24	0	29	4.77	2024-07-01	0	2024-07-10	0	29	4.96	2024-07-17	0	2024-07-22	0	29	5.29	2024-07-29	0	2024-08-06	1	29	5.29	2024-08-12	1	2024-08-19	1	29	5.29	2024-08-26	1	2024-09-03	1			2025-09-10	1
C-07-32	7	Control	2024-06-10	0	34	3.66	2024-06-17	0	2024-06-24	0	34.5	4.21	2024-07-01	0	2024-07-10	0	33.5	4.56	2024-07-17	0	2024-07-22	0	33.5	4.795	2024-07-29	1	2024-08-06	1	33.5	4.79	2024-08-12	1	2024-08-19	1			2024-08-26	1	2024-09-03	1			2025-09-10	1
C-07-33	10	Control	2024-06-10	0	24.5	4.76	2024-06-17	0	2024-06-24	0	25	4.8	2024-07-01	0	2024-07-10	0	25	4.75	2024-07-17	0	2024-07-22	0	25	4.805	2024-07-29	0	2024-08-06	0	25	4.805	2024-08-12	0	2024-08-19	1	25	4.805	2024-08-26	1	2024-09-03	1			2025-09-10	1
C-07-34	12	Control	2024-06-10	0	23	3.6	2024-06-17	0	2024-06-24	0	23	3.8	2024-07-01	0	2024-07-10	0	23	3.83	2024-07-17	0	2024-07-22	0	23	3.9	2024-07-29	0	2024-08-06	0	23	3.97	2024-08-12	0	2024-08-19	0	23	3.97	2024-08-26	0	2024-09-03	1			2025-09-10	1
C-07-35	11	Control	2024-06-10	0	27	3.32	2024-06-17	0	2024-06-24	0	28	4.1	2024-07-01	0	2024-07-10	0	27	4.23	2024-07-17	0	2024-07-22	0	27	4.2	2024-07-29	0	2024-08-06	0	27	4.25	2024-08-12	0	2024-08-19	0	27	4.25	2024-08-26	1	2024-09-03	1			2025-09-10	1
C-08-36	8	Control	2024-06-10	0	38	3.5	2024-06-17	0	2024-06-24	0	39	4.69	2024-07-01	0	2024-07-10	0	39.5	4.77	2024-07-17	0	2024-07-22	0	39.5	4.92	2024-07-29	0	2024-08-06	1	39.5	4.93	2024-08-12	1	2024-08-19	1	39.5	4.93	2024-08-26	1	2024-09-03	1			2025-09-10	1
C-08-37	8	Control	2024-06-10	0	30	3.2	2024-06-17	0	2024-06-24	0	30	3.8	2024-07-01	0	2024-07-10	0	31	3.8	2024-07-17	0	2024-07-22	0	31	3.835	2024-07-29	0	2024-08-06	1	31	3.85	2024-08-12	1	2024-08-19	0	31	3.85	2024-08-26	1	2024-09-03	1			2025-09-10	1
C-08-38	10	Control	2024-06-10	0	23.5	3	2024-06-17	0	2024-06-24	0	24	3.6	2024-07-01	0	2024-07-10	0	24	3.6	2024-07-17	0	2024-07-22	0	24	3.6	2024-07-29	0	2024-08-06	0	24	3.64	2024-08-12	0	2024-08-19	1	24	3.64	2024-08-26	1	2024-09-03	1			2025-09-10	1
C-08-39	9	Control	2024-06-10	0	37	4.71	2024-06-17	0	2024-06-24	0	37	5	2024-07-01	0	2024-07-10	0	37	5.1	2024-07-17	0	2024-07-22	0	37	5.1	2024-07-29	0	2024-08-06	0	37	5.12	2024-08-12	1	2024-08-19	1	37	5.12	2024-08-26	1	2024-09-03	1			2025-09-10	1
C-08-40	11	Control	2024-06-10	0	24	2.78	2024-06-17	0	2024-06-24	0	24.5	3.59	2024-07-01	0	2024-07-10	0	24.5	3.89	2024-07-17	0	2024-07-22	0	24.5	4.05	2024-07-29	0	2024-08-06	0	24.5	3.99	2024-08-12	0	2024-08-19	0	24.5	3.99	2024-08-26	1	2024-09-03	1			2025-09-10	1
C-09-41	8	Control	2024-06-10	0	38	5.22	2024-06-17	0	2024-06-24	0	38.5	5.35	2024-07-01	0	2024-07-10	0	38.5	5.54	2024-07-17	0	2024-07-22	0	38.5	5.38	2024-07-29	0	2024-08-06	1	38.5	5.38	2024-08-12	1	2024-08-19	1	38.5	5.38	2024-08-26	1	2024-09-03	1			2025-09-10	1
C-09-42	7	Control	2024-06-10	0	30	4.74	2024-06-17	0	2024-06-24	0	30	5.02	2024-07-01	0	2024-07-10	0	30	5.09	2024-07-17	0	2024-07-22	0	30	5.1	2024-07-29	1	2024-08-06	1	30	5.12	2024-08-12	1	2024-08-19	1			2024-08-26	1	2024-09-03	1			2025-09-10	1
C-09-43	8	Control	2024-06-10	0	35.5	4.17	2024-06-17	0	2024-06-24	0	35.5	4.53	2024-07-01	0	2024-07-10	0	35.5	4.92	2024-07-17	0	2024-07-22	0	35.5	4.935	2024-07-29	0	2024-08-06	1	35.5	4.935	2024-08-12	1	2024-08-19	1	35.5	4.935	2024-08-26	1	2024-09-03	1			2025-09-10	1
C-09-44	8	Control	2024-06-10	0	28	5.1	2024-06-17	0	2024-06-24	0	28.5	5.13	2024-07-01	0	2024-07-10	0	29.5	5.25	2024-07-17	0	2024-07-22	0	29.5	5.67	2024-07-29	0	2024-08-06	1	29.5	5.66	2024-08-12	1	2024-08-19	1	29.5	5.66	2024-08-26	1	2024-09-03	1			2025-09-10	1
C-09-45	8	Control	2024-06-10	0	30.5	4.75	2024-06-17	0	2024-06-24	0	30.5	4.75	2024-07-01	0	2024-07-10	0	30.5	4.82	2024-07-17	0	2024-07-22	0	30.5	4.805	2024-07-29	0	2024-08-06	1	30.5	4.81	2024-08-12	1	2024-08-19	1	30.5	4.81	2024-08-26	1	2024-09-03	1			2025-09-10	1
C-10-46	9	Control	2024-06-10	0	25.5	3.46	2024-06-17	0	2024-06-24	0	26	4.17	2024-07-01	0	2024-07-10	0	26	4.6	2024-07-17	0	2024-07-22	0	26	4.72	2024-07-29	0	2024-08-06	0	26	4.73	2024-08-12	1	2024-08-19	1	26	4.73	2024-08-26	1	2024-09-03	1			2025-09-10	1
C-10-47	9	Control	2024-06-10	0	36	4.02	2024-06-17	0	2024-06-24	0	36	4.15	2024-07-01	0	2024-07-10	0	36	4.28	2024-07-17	0	2024-07-22	0	36	4.33	2024-07-29	0	2024-08-06	0	36	4.36	2024-08-12	1	2024-08-19	0	36	4.36	2024-08-26	1	2024-09-03	1			2025-09-10	1
C-10-48	7	Control	2024-06-10	0	39.5	3.95	2024-06-17	0	2024-06-24	0	39.5	4.68	2024-07-01	0	2024-07-10	0	40	4.68	2024-07-17	0	2024-07-22	0	40	4.675	2024-07-29	1	2024-08-06	1	40	4.71	2024-08-12	1	2024-08-19	1			2024-08-26	1	2024-09-03	1			2025-09-10	1
C-10-49	8	Control	2024-06-10	0	34	4.7	2024-06-17	0	2024-06-24	0	34	4.8	2024-07-01	0	2024-07-10	0	34	5.26	2024-07-17	0	2024-07-22	0	34	5.275	2024-07-29	0	2024-08-06	1	34	5.27	2024-08-12	1	2024-08-19	1	34	5.27	2024-08-26	1	2024-09-03	1			2025-09-10	1
C-10-50	9	Control	2024-06-10	0	30.5	2.55	2024-06-17	0	2024-06-24	0	30	3.95	2024-07-01	0	2024-07-10	0	30	4	2024-07-17	0	2024-07-22	0	30	4	2024-07-29	0	2024-08-06	0	30	4.02	2024-08-12	1	2024-08-19	1	30	4.02	2024-08-26	1	2024-09-03	1			2025-09-10	1
C-11-51	8	Control	2024-06-10	0	31.5	3.43	2024-06-17	0	2024-06-24	0	32	3.78	2024-07-01	0	2024-07-10	0	32	4.04	2024-07-17	0	2024-07-22	0	32	4.08	2024-07-29	0	2024-08-06	1	32	4.08	2024-08-12	1	2024-08-19	1	32	4.08	2024-08-26	1	2024-09-03	1			2025-09-10	1
C-11-52	6	Control	2024-06-10	0	35	3.77	2024-06-17	0	2024-06-24	0	35.5	4.16	2024-07-01	0	2024-07-10	0	35.5	4.88	2024-07-17	0	2024-07-22	1	35.5	5.135	2024-07-29	1	2024-08-06	1	35.5	5.135	2024-08-12	1	2024-08-19	1			2024-08-26	1	2024-09-03	1			2025-09-10	1
C-11-53	6	Control	2024-06-10	0	39.5	3.87	2024-06-17	0	2024-06-24	0	39.5	4.5	2024-07-01	0	2024-07-10	0	40	4.6	2024-07-17	0	2024-07-22	1	40	4.59	2024-07-29	1	2024-08-06	1	40	4.59	2024-08-12	1	2024-08-19	1			2024-08-26	1	2024-09-03	1			2025-09-10	1
C-11-54	11	Control	2024-06-10	0	28	2.98	2024-06-17	0	2024-06-24	0	28.5	3.75	2024-07-01	0	2024-07-10	0	28.5	3.8	2024-07-17	0	2024-07-22	0	28.5	3.755	2024-07-29	0	2024-08-06	0	28.5	3.755	2024-08-12	0	2024-08-19	0	28.5	3.755	2024-08-26	1	2024-09-03	1			2025-09-10	1
C-11-55	8	Control	2024-06-10	0	39.5	5.86	2024-06-17	0	2024-06-24	0	39.5	6	2024-07-01	0	2024-07-10	0	40.5	6	2024-07-17	0	2024-07-22	0	40.5	6.02	2024-07-29	0	2024-08-06	1	40.5	6.02	2024-08-12	1	2024-08-19	1	40.5	6.02	2024-08-26	1	2024-09-03	1			2025-09-10	1
C-12-56	6	Control	2024-06-10	0	35	5.52	2024-06-17	0	2024-06-24	0	36	5.7	2024-07-01	0	2024-07-10	0	36	5.7	2024-07-17	0	2024-07-22	1	36	5.7	2024-07-29	1	2024-08-06	1			2024-08-12	1	2024-08-19	1			2024-08-26	1	2024-09-03	1			2025-09-10	1
C-12-57	9	Control	2024-06-10	0	33	3.68	2024-06-17	0	2024-06-24	0	33	4.05	2024-07-01	0	2024-07-10	0	33	4.06	2024-07-17	0	2024-07-22	0	33	4.07	2024-07-29	0	2024-08-06	0	33	4.07	2024-08-12	1	2024-08-19	1	33	4.07	2024-08-26	1	2024-09-03	1			2025-09-10	1
C-12-58	9	Control	2024-06-10	0	32	4.56	2024-06-17	0	2024-06-24	0	32	4.88	2024-07-01	0	2024-07-10	0	32	5.61	2024-07-17	0	2024-07-22	0	32	5.625	2024-07-29	0	2024-08-06	0	32	5.66	2024-08-12	1	2024-08-19	1	32	5.66	2024-08-26	1	2024-09-03	1			2025-09-10	1
C-12-59	7	Control	2024-06-10	0	34.5	3.14	2024-06-17	0	2024-06-24	0	34.5	4.36	2024-07-01	0	2024-07-10	0	34.5	4.36	2024-07-17	0	2024-07-22	0	34.5	4.41	2024-07-29	1	2024-08-06	1	34.5	4.39	2024-08-12	1	2024-08-19	1			2024-08-26	1	2024-09-03	1			2025-09-10	1
C-12-60	8	Control	2024-06-10	0	25	2.46	2024-06-17	0	2024-06-24	0	25	2.71	2024-07-01	0	2024-07-10	0	25.5	3.51	2024-07-17	0	2024-07-22	0	25.5	3.44	2024-07-29	0	2024-08-06	1	25.5	3.46	2024-08-12	1	2024-08-19	1	25.5	3.46	2024-08-26	1	2024-09-03	1			2025-09-10	1
C-13-61	8	Control	2024-06-10	0	26	3.68	2024-06-17	0	2024-06-24	0	26	3.8	2024-07-01	0	2024-07-10	0	26.5	3.84	2024-07-17	0	2024-07-22	0	26.5	3.88	2024-07-29	0	2024-08-06	1	26.5	3.88	2024-08-12	1	2024-08-19	1	26.5	3.88	2024-08-26	1	2024-09-03	1			2025-09-10	1
C-13-62	8	Control	2024-06-10	0	34.5	3.83	2024-06-17	0	2024-06-24	0	34.5	4.52	2024-07-01	0	2024-07-10	0	34	4.61	2024-07-17	0	2024-07-22	0	34.5	4.865	2024-07-29	0	2024-08-06	1	34.5	4.865	2024-08-12	1	2024-08-19	1	34.5	4.865	2024-08-26	1	2024-09-03	1			2025-09-10	1
C-13-63	5	Control	2024-06-10	0	38.5	6	2024-06-17	0	2024-06-24	0	38.5	6.28	2024-07-01	0	2024-07-10	0	39	6.35	2024-07-17	1		1	39	6.415	2024-07-29	1	2024-08-06	1			2024-08-12	1	2024-08-19	1			2024-08-26	1	2024-09-03	1			2025-09-10	1
C-13-64	8	Control	2024-06-10	0	29.5	3.7	2024-06-17	0	2024-06-24	0	31	4.06	2024-07-01	0	2024-07-10	0	30.5	4.1	2024-07-17	0	2024-07-22	0	30.5	4.095	2024-07-29	0	2024-08-06	1	30.5	4.13	2024-08-12	1	2024-08-19	1	30.5	4.095	2024-08-26	1	2024-09-03	1			2025-09-10	1
C-13-65	6	Control	2024-06-10	0	27.5	4.13	2024-06-17	0	2024-06-24	0	28	4.89	2024-07-01	0	2024-07-10	0	27.5	5.1	2024-07-17	0	2024-07-22	1	27.5	5.08	2024-07-29	1	2024-08-06	1			2024-08-12	1	2024-08-19	1			2024-08-26	1	2024-09-03	1			2025-09-10	1
C-14-66	8	Control	2024-06-10	0	33	4.31	2024-06-17	0	2024-06-24	0	33	4.58	2024-07-01	0	2024-07-10	0	33.5	4.6	2024-07-17	0	2024-07-22	0	33.5	4.63	2024-07-29	0	2024-08-06	1	33.5	4.63	2024-08-12	1	2024-08-19	1	33.5	4.63	2024-08-26	1	2024-09-03	1			2025-09-10	1
C-14-67	10	Control	2024-06-10	0	31.5	4.3	2024-06-17	0	2024-06-24	0	31.5	4.4	2024-07-01	0	2024-07-10	0	31.5	4.4	2024-07-17	0	2024-07-22	0	31.5	4.44	2024-07-29	0	2024-08-06	0	31.5	4.44	2024-08-12	0	2024-08-19	1	31.5	4.44	2024-08-26	1	2024-09-03	1			2025-09-10	1
C-14-68	9	Control	2024-06-10	0	24	3.49	2024-06-17	0	2024-06-24	0	24	3.98	2024-07-01	0	2024-07-10	0	24	4.31	2024-07-17	0	2024-07-22	0	24	4.395	2024-07-29	0	2024-08-06	0	24	4.395	2024-08-12	1	2024-08-19	1	24	4.395	2024-08-26	1	2024-09-03	1			2025-09-10	1
C-14-69	7	Control	2024-06-10	0	34.5	4.36	2024-06-17	0	2024-06-24	0	34	4.77	2024-07-01	0	2024-07-10	0	34.5	4.84	2024-07-17	0	2024-07-22	0	34.5	4.88	2024-07-29	1	2024-08-06	1	34.5	4.88	2024-08-12	1	2024-08-19	1			2024-08-26	1	2024-09-03	1			2025-09-10	1
C-14-70	7	Control	2024-06-10	0	40	4.02	2024-06-17	0	2024-06-24	0	40	4.57	2024-07-01	0	2024-07-10	0	40	4.68	2024-07-17	0	2024-07-22	0	40	4.695	2024-07-29	1	2024-08-06	1	40	4.69	2024-08-12	1	2024-08-19	1			2024-08-26	1	2024-09-03	1			2025-09-10	1
C-15-71	11	Control	2024-06-10	0	24	3.5	2024-06-17	0	2024-06-24	0	24	3.52	2024-07-01	0	2024-07-10	0	24	3.58	2024-07-17	0	2024-07-22	0	24	3.43	2024-07-29	0	2024-08-06	0	24	3.43	2024-08-12	0	2024-08-19	0	24	3.43	2024-08-26	1	2024-09-03	1			2025-09-10	1
C-15-72	8	Control	2024-06-10	0	35.5	3.3	2024-06-17	0	2024-06-24	0	35.5	3.27	2024-07-01	0	2024-07-10	0	35.5	3.8	2024-07-17	0	2024-07-22	0	35.5	3.99	2024-07-29	0	2024-08-06	1	35.5	3.99	2024-08-12	1	2024-08-19	1	35.5	3.99	2024-08-26	1	2024-09-03	1			2025-09-10	1
C-15-73	9	Control	2024-06-10	0	32	4.26	2024-06-17	0	2024-06-24	0	32	4.71	2024-07-01	0	2024-07-10	0	32	5.11	2024-07-17	0	2024-07-22	0	32	5.205	2024-07-29	0	2024-08-06	0	32	5.205	2024-08-12	1	2024-08-19	1	32	5.205	2024-08-26	1	2024-09-03	1			2025-09-10	1
C-15-74	10	Control	2024-06-10	0	30	3.8	2024-06-17	0	2024-06-24	0	30	4.03	2024-07-01	0	2024-07-10	0	30.5	4.22	2024-07-17	0	2024-07-22	0	30.5	4.17	2024-07-29	0	2024-08-06	0	30.5	4.17	2024-08-12	0	2024-08-19	1	30.5	4.17	2024-08-26	1	2024-09-03	1			2025-09-10	1
C-15-75	8	Control	2024-06-10	0	35	3.71	2024-06-17	0	2024-06-24	0	35	4.35	2024-07-01	0	2024-07-10	0	35.5	4.47	2024-07-17	0	2024-07-22	0	35.5	4.58	2024-07-29	0	2024-08-06	1	35.5	4.58	2024-08-12	1	2024-08-19	1	35.5	4.58	2024-08-26	1	2024-09-03	1			2025-09-10	1
C-16-76	8	Control	2024-06-10	0	29	3.26	2024-06-17	0	2024-06-24	0	29	3.88	2024-07-01	0	2024-07-10	0	29.5	4.23	2024-07-17	0	2024-07-22	0	29.5	4.365	2024-07-29	0	2024-08-06	1	29.5	4.36	2024-08-12	1	2024-08-19	1			2024-08-26	1	2024-09-03	1			2025-09-10	1
C-16-77	9	Control	2024-06-10	0	24	3.5	2024-06-17	0	2024-06-24	0	24	3.9	2024-07-01	0	2024-07-10	0	25	3.91	2024-07-17	0	2024-07-22	0	25	3.91	2024-07-29	0	2024-08-06	0	25	3.91	2024-08-12	1	2024-08-19	1	25	3.91	2024-08-26	1	2024-09-03	1			2025-09-10	1
C-16-78	8	Control	2024-06-10	0	33	4.31	2024-06-17	0	2024-06-24	0	36	4.6	2024-07-01	0	2024-07-10	0	36	4.95	2024-07-17	0	2024-07-22	0	36	5.195	2024-07-29	0	2024-08-06	1	36	5.18	2024-08-12	1	2024-08-19	1			2024-08-26	1	2024-09-03	1			2025-09-10	1
C-16-79	8	Control	2024-06-10	0	32.5	4.47	2024-06-17	0	2024-06-24	0	34	4.66	2024-07-01	0	2024-07-10	0	34	4.67	2024-07-17	0	2024-07-22	0	34	5.02	2024-07-29	0	2024-08-06	1	34	5.02	2024-08-12	1	2024-08-19	1	34	5.02	2024-08-26	1	2024-09-03	1			2025-09-10	1
C-16-80	8	Control	2024-06-10	0	36.5	4.7	2024-06-17	0	2024-06-24	0	37	5.05	2024-07-01	0	2024-07-10	0	37	5.22	2024-07-17	0	2024-07-22	0	37	5.26	2024-07-29	0	2024-08-06	1	37	5.26	2024-08-12	1	2024-08-19	1	37	5.26	2024-08-26	1	2024-09-03	1			2025-09-10	1
C-17-81	8	Control	2024-06-10	0	32.5	4.27	2024-06-17	0	2024-06-24	0	32.5	4.57	2024-07-01	0	2024-07-10	0	33	4.59	2024-07-17	0	2024-07-22	0	33	4.61	2024-07-29	0	2024-08-06	1	33	4.62	2024-08-12	1	2024-08-19	1	33	4.62	2024-08-26	1	2024-09-03	1			2025-09-10	1
C-17-82	8	Control	2024-06-10	0	31	5.04	2024-06-17	0	2024-06-24	0	31	5.03	2024-07-01	0	2024-07-10	0	32	5.18	2024-07-17	0	2024-07-22	0	32	5.245	2024-07-29	0	2024-08-06	1	32	5.2	2024-08-12	1	2024-08-19	1	32	5.2	2024-08-26	1	2024-09-03	1			2025-09-10	1
C-17-83	10	Control	2024-06-10	0	24	3.26	2024-06-17	0	2024-06-24	0	25	3.79	2024-07-01	0	2024-07-10	0	25	3.9	2024-07-17	0	2024-07-22	0	25	3.805	2024-07-29	0	2024-08-06	0	25	3.81	2024-08-12	0	2024-08-19	1	25	3.81	2024-08-26	1	2024-09-03	1			2025-09-10	1
C-17-84	7	Control	2024-06-10	0	41	4.05	2024-06-17	0	2024-06-24	0	41	4.36	2024-07-01	0	2024-07-10	0	41	4.66	2024-07-17	0	2024-07-22	0	41	4.715	2024-07-29	1	2024-08-06	1	41	4.73	2024-08-12	1	2024-08-19	1			2024-08-26	1	2024-09-03	1			2025-09-10	1
C-17-85	9	Control	2024-06-10	0	40	3.96	2024-06-17	0	2024-06-24	0	40	4.41	2024-07-01	0	2024-07-10	0	40	4.73	2024-07-17	0	2024-07-22	0	40	4.94	2024-07-29	0	2024-08-06	0	40	4.95	2024-08-12	1	2024-08-19	1	40	4.95	2024-08-26	1	2024-09-03	1			2025-09-10	1
C-18-86	10	Control	2024-06-10	0	34	4.72	2024-06-17	0	2024-06-24	0	34	4.71	2024-07-01	0	2024-07-10	0	34	4.8	2024-07-17	0	2024-07-22	0	34	4.87	2024-07-29	0	2024-08-06	0	34	4.87	2024-08-12	0	2024-08-19	1	34	4.87	2024-08-26	1	2024-09-03	1			2025-09-10	1
C-18-87	8	Control	2024-06-10	0	31	4.32	2024-06-17	0	2024-06-24	0	31	4.48	2024-07-01	0	2024-07-10	0	31	4.47	2024-07-17	0	2024-07-22	0	31	4.59	2024-07-29	0	2024-08-06	1	31	4.59	2024-08-12	1	2024-08-19	1	31	4.59	2024-08-26	1	2024-09-03	1			2025-09-10	1
C-18-88	8	Control	2024-06-10	0	26	3.1	2024-06-17	0	2024-06-24	0	25.5	3.7	2024-07-01	0	2024-07-10	0	26	3.95	2024-07-17	0	2024-07-22	0	26	4.055	2024-07-29	0	2024-08-06	1	26	4.055	2024-08-12	1	2024-08-19	1	26	4.055	2024-08-26	1	2024-09-03	1			2025-09-10	1
C-18-89	7	Control	2024-06-10	0	28.5	2.8	2024-06-17	0	2024-06-24	0	28	3.3	2024-07-01	0	2024-07-10	0	28.5	3.7	2024-07-17	0	2024-07-22	0	28.5	3.7	2024-07-29	1	2024-08-06	1	28.5	3.69	2024-08-12	1	2024-08-19	1			2024-08-26	1	2024-09-03	1			2025-09-10	1
C-18-90	10	Control	2024-06-10	0	36.5	3.58	2024-06-17	0	2024-06-24	0	37	4.2	2024-07-01	0	2024-07-10	0	37	4.51	2024-07-17	0	2024-07-22	0	37	4.725	2024-07-29	0	2024-08-06	0	37	4.725	2024-08-12	0	2024-08-19	1	37	4.725	2024-08-26	1	2024-09-03	1			2025-09-10	1
C-19-91	9	Control	2024-06-10	0	35.5	4.4	2024-06-17	0	2024-06-24	0	35.5	4.9	2024-07-01	0	2024-07-10	0	36	5.4	2024-07-17	0	2024-07-22	0	36	5.54	2024-07-29	0	2024-08-06	0	36	5.54	2024-08-12	1	2024-08-19	1	36	5.54	2024-08-26	1	2024-09-03	1			2025-09-10	1
C-19-92	9	Control	2024-06-10	0	35	4.5	2024-06-17	0	2024-06-24	0	35	4.9	2024-07-01	0	2024-07-10	0	35.5	5.21	2024-07-17	0	2024-07-22	0	35.5	5.205	2024-07-29	0	2024-08-06	0	35.5	5.205	2024-08-12	1	2024-08-19	1	35.5	5.205	2024-08-26	1	2024-09-03	1			2025-09-10	1
C-19-93	11	Control	2024-06-10	0	33.5	3.82	2024-06-17	0	2024-06-24	0	33	4.1	2024-07-01	0	2024-07-10	0	33.5	4.1	2024-07-17	0	2024-07-22	0	36	4.12	2024-07-29	0	2024-08-06	0	36	4.12	2024-08-12	0	2024-08-19	0	36	4.12	2024-08-26	1	2024-09-03	1			2025-09-10	1
C-19-94	10	Control	2024-06-10	0	26	3.91	2024-06-17	0	2024-06-24	0	28.5	4.5	2024-07-01	0	2024-07-10	0	29	4.7	2024-07-17	0	2024-07-22	0	29.5	4.805	2024-07-29	0	2024-08-06	0	29	4.805	2024-08-12	0	2024-08-19	1	29	4.805	2024-08-26	1	2024-09-03	1			2025-09-10	1
C-19-95	8	Control	2024-06-10	0	27.5	4.55	2024-06-17	0	2024-06-24	0	28.5	4.9	2024-07-01	0	2024-07-10	0	28.5	5.12	2024-07-17	0	2024-07-22	0	28.5	5.125	2024-07-29	0	2024-08-06	1	28.5	5.125	2024-08-12	1	2024-08-19	1	28.5	5.125	2024-08-26	1	2024-09-03	1			2025-09-10	1
C-20-100	12	Control	2024-06-10	0	32.5	3.5	2024-06-17	0	2024-06-24	0	33	3.7	2024-07-01	0	2024-07-10	0	33	3.7	2024-07-17	0	2024-07-22	0	33	3.74	2024-07-29	0	2024-08-06	0	33	3.74	2024-08-12	0	2024-08-19	0	33	3.74	2024-08-26	0	2024-09-03	1			2025-09-10	1
C-20-96	11	Control	2024-06-10	0	29	3.11	2024-06-17	0	2024-06-24	0	28	3.4	2024-07-01	0	2024-07-10	0	28	3.57	2024-07-17	0	2024-07-22	0	29	3.61	2024-07-29	0	2024-08-06	0	29	3.66	2024-08-12	0	2024-08-19	0	29	3.66	2024-08-26	1	2024-09-03	1			2025-09-10	1
C-20-97	8	Control	2024-06-10	0	31	4.28	2024-06-17	0	2024-06-24	0	31	4.39	2024-07-01	0	2024-07-10	0	31.5	4.5	2024-07-17	0	2024-07-22	0	31.5	4.465	2024-07-29	0	2024-08-06	1	31.5	4.465	2024-08-12	1	2024-08-19	1	31.5	4.465	2024-08-26	1	2024-09-03	1			2025-09-10	1
C-20-98	9	Control	2024-06-10	0	34	4.34	2024-06-17	0	2024-06-24	0	34	4.8	2024-07-01	0	2024-07-10	0	34.5	5.03	2024-07-17	0	2024-07-22	0	34.5	5.075	2024-07-29	0	2024-08-06	0	34.5	5.075	2024-08-12	1	2024-08-19	1	34.5	5.075	2024-08-26	1	2024-09-03	1			2025-09-10	1
C-20-99	8	Control	2024-06-10	0	38	4	2024-06-17	0	2024-06-24	0	38	4.7	2024-07-01	0	2024-07-10	0	38	4.8	2024-07-17	0	2024-07-22	0	38	4.89	2024-07-29	0	2024-08-06	1	38	4.89	2024-08-12	1	2024-08-19	1	38	4.89	2024-08-26	1	2024-09-03	1			2025-09-10	1
C-21-101	9	Control	2024-06-10	0	31.5	4.19	2024-06-17	0	2024-06-24	0	31.5	5	2024-07-01	0	2024-07-10	0	31.5	5.16	2024-07-17	0	2024-07-22	0	31.5	5.185	2024-07-29	0	2024-08-06	0	31.5	5.18	2024-08-12	1	2024-08-19	1	31.5	5.18	2024-08-26	1	2024-09-03	1			2025-09-10	1
C-21-102	7	Control	2024-06-10	0	35	3.93	2024-06-17	0	2024-06-24	0	36	4.5	2024-07-01	0	2024-07-10	0	36.5	4.99	2024-07-17	0	2024-07-22	0	36.5	4.975	2024-07-29	1	2024-08-06	1	36.5	4.97	2024-08-12	1	2024-08-19	1			2024-08-26	1	2024-09-03	1			2025-09-10	1
C-21-103	9	Control	2024-06-10	0	28	2.6	2024-06-17	0	2024-06-24	0	28	3.6	2024-07-01	0	2024-07-10	0	28	3.7	2024-07-17	0	2024-07-22	0	28	4	2024-07-29	0	2024-08-06	0	28	3.99	2024-08-12	1	2024-08-19	1	28	3.99	2024-08-26	1	2024-09-03	1			2025-09-10	1
C-21-104	7	Control	2024-06-10	0	24.5	4.73	2024-06-17	0	2024-06-24	0	24.5	4.8	2024-07-01	0	2024-07-10	0	24.5	5.53	2024-07-17	0	2024-07-22	0	24.5	5.625	2024-07-29	1	2024-08-06	1	24.5	5.64	2024-08-12	1	2024-08-19	1			2024-08-26	1	2024-09-03	1			2025-09-10	1
C-21-105	8	Control	2024-06-10	0	28	3	2024-06-17	0	2024-06-24	0	28	3.6	2024-07-01	0	2024-07-10	0	28	3.6	2024-07-17	0	2024-07-22	0	28	3.62	2024-07-29	0	2024-08-06	1	28	3.63	2024-08-12	1	2024-08-19	1	28	3.63	2024-08-26	1	2024-09-03	1			2025-09-10	1
C-22-106	8	Control	2024-06-10	0	26	3.8	2024-06-17	0	2024-06-24	0	26	4.3	2024-07-01	0	2024-07-10	0	26	4.4	2024-07-17	0	2024-07-22	0	26	4.445	2024-07-29	0	2024-08-06	1	26	4.445	2024-08-12	1	2024-08-19	1	26	4.445	2024-08-26	1	2024-09-03	1			2025-09-10	1
C-22-107	8	Control	2024-06-10	0	32.5	4.44	2024-06-17	0	2024-06-24	0	33	4.5	2024-07-01	0	2024-07-10	0	33.5	4.5	2024-07-17	0	2024-07-22	0	33.6	4.545	2024-07-29	0	2024-08-06	1	33.6	4.54	2024-08-12	1	2024-08-19	1	33.6	4.54	2024-08-26	1	2024-09-03	1			2025-09-10	1
C-22-108	7	Control	2024-06-10	0	30	4.19	2024-06-17	0	2024-06-24	0	30.5	4.88	2024-07-01	0	2024-07-10	0	30.5	5.38	2024-07-17	0	2024-07-22	0	30.5	5.4	2024-07-29	1	2024-08-06	1	30.5	5.4	2024-08-12	1	2024-08-19	1			2024-08-26	1	2024-09-03	1			2025-09-10	1
C-22-109	7	Control	2024-06-10	0	27.5	4.91	2024-06-17	0	2024-06-24	0	28	5.2	2024-07-01	0	2024-07-10	0	28	5.45	2024-07-17	0	2024-07-22	0	28	5.49	2024-07-29	1	2024-08-06	1	28	5.46	2024-08-12	1	2024-08-19	1			2024-08-26	1	2024-09-03	1			2025-09-10	1
C-22-110	7	Control	2024-06-10	0	31.5	4.5	2024-06-17	0	2024-06-24	0	31.5	5.03	2024-07-01	0	2024-07-10	0	32	5.6	2024-07-17	0	2024-07-22	0	32	5.675	2024-07-29	1	2024-08-06	1	32	5.67	2024-08-12	1	2024-08-19	1			2024-08-26	1	2024-09-03	1			2025-09-10	1
C-23-111	7	Control	2024-06-10	0	29	4.13	2024-06-17	0	2024-06-24	0	29	4.3	2024-07-01	0	2024-07-10	0	29	4.4	2024-07-17	0	2024-07-22	0	29	4.45	2024-07-29	1	2024-08-06	1	29	4.45	2024-08-12	1	2024-08-19	1			2024-08-26	1	2024-09-03	1			2025-09-10	1
C-23-112	6	Control	2024-06-10	0	28.5	3.9	2024-06-17	0	2024-06-24	0	28	4.7	2024-07-01	0	2024-07-10	0	28.5	4.7	2024-07-17	0	2024-07-22	1	28.5	4.775	2024-07-29	1	2024-08-06	1			2024-08-12	1	2024-08-19	1			2024-08-26	1	2024-09-03	1			2025-09-10	1
C-23-113	8	Control	2024-06-10	0	32	3.1	2024-06-17	0	2024-06-24	0	31	3.55	2024-07-01	0	2024-07-10	0	31	3.63	2024-07-17	0	2024-07-22	0	31	3.715	2024-07-29	0	2024-08-06	1	31	3.715	2024-08-12	1	2024-08-19	1	31	3.715	2024-08-26	1	2024-09-03	1			2025-09-10	1
C-23-114	8	Control	2024-06-10	0	30	4.08	2024-06-17	0	2024-06-24	0	30.5	4.4	2024-07-01	0	2024-07-10	0	30.5	4.59	2024-07-17	0	2024-07-22	0	30.5	4.855	2024-07-29	0	2024-08-06	1	30.5	4.855	2024-08-12	1	2024-08-19	1	30.5	4.855	2024-08-26	1	2024-09-03	1			2025-09-10	1
C-23-115	12	Control	2024-06-10	0	29	3.5	2024-06-17	0	2024-06-24	0	29	3.7	2024-07-01	0	2024-07-10	0	29	3.7	2024-07-17	0	2024-07-22	0	29	3.7	2024-07-29	0	2024-08-06	0	29	3.67	2024-08-12	0	2024-08-19	0	29	3.67	2024-08-26	0	2024-09-03	1			2025-09-10	1
C-24-116	9	Control	2024-06-10	0	29	3.3	2024-06-17	0	2024-06-24	0	28	3.9	2024-07-01	0	2024-07-10	0	28	4.09	2024-07-17	0	2024-07-22	0	28	4.09	2024-07-29	0	2024-08-06	0	28	4.09	2024-08-12	1	2024-08-19	1	28	4.09	2024-08-26	1	2024-09-03	1			2025-09-10	1
C-24-117	8	Control	2024-06-10	0	35.5	4.7	2024-06-17	0	2024-06-24	0	35.5	5.3	2024-07-01	0	2024-07-10	0	35.5	5.4	2024-07-17	0	2024-07-22	0	35.5	5.5	2024-07-29	0	2024-08-06	1	35.5	5.49	2024-08-12	1	2024-08-19	1	35.5	5.49	2024-08-26	1	2024-09-03	1			2025-09-10	1
C-24-118	8	Control	2024-06-10	0	37.5	4	2024-06-17	0	2024-06-24	0	36.5	4.1	2024-07-01	0	2024-07-10	0	36	4.3	2024-07-17	0	2024-07-22	0	36	4.4	2024-07-29	0	2024-08-06	1	36	4.4	2024-08-12	1	2024-08-19	1	36	4.41	2024-08-26	1	2024-09-03	1			2025-09-10	1
C-24-119	8	Control	2024-06-10	0	34	4.8	2024-06-17	0	2024-06-24	0	34	5.3	2024-07-01	0	2024-07-10	0	34	5.35	2024-07-17	0	2024-07-22	0	34	5.35	2024-07-29	0	2024-08-06	1	34	5.36	2024-08-12	1	2024-08-19	1	34	5.36	2024-08-26	1	2024-09-03	1			2025-09-10	1
C-24-120	10	Control	2024-06-10	0	24	3.69	2024-06-17	0	2024-06-24	0	24	3.9	2024-07-01	0	2024-07-10	0	24	4.2	2024-07-17	0	2024-07-22	0	24	4.375	2024-07-29	0	2024-08-06	0	24	4.32	2024-08-12	0	2024-08-19	1	24	4.32	2024-08-26	1	2024-09-03	1			2025-09-10	1
C-25-121	8	Control	2024-06-10	0	19	5.26	2024-06-17	0	2024-06-24	0	19	5.5	2024-07-01	0	2024-07-10	0	19	5.21	2024-07-17	0	2024-07-22	0	19	5.69	2024-07-29	0	2024-08-06	1	19	5.7	2024-08-12	1	2024-08-19	1	19	5.7	2024-08-26	1	2024-09-03	1			2025-09-10	1
C-25-122	8	Control	2024-06-10	0	38.5	4.7	2024-06-17	0	2024-06-24	0	39	5.1	2024-07-01	0	2024-07-10	0	39	5.2	2024-07-17	0	2024-07-22	0	39	5.38	2024-07-29	0	2024-08-06		39	5.4	2024-08-12	1	2024-08-19	1	39	5.4	2024-08-26	1	2024-09-03	1			2025-09-10	1
C-25-123	10	Control	2024-06-10	0	32	4.6	2024-06-17	0	2024-06-24	0	32.5	5.1	2024-07-01	0	2024-07-10	0	32.5	5.2	2024-07-17	0	2024-07-22	0	32.5	5.56	2024-07-29	0	2024-08-06	0	32.5	5.55	2024-08-12	0	2024-08-19	1	32.5	5.55	2024-08-26	1	2024-09-03	1			2025-09-10	1
C-25-124	8	Control	2024-06-10	0	31	5.3	2024-06-17	0	2024-06-24	0	31	5.4	2024-07-01	0	2024-07-10	0	31.5	5.57	2024-07-17	0	2024-07-22	0	31.5	6.035	2024-07-29	0	2024-08-06	1	31.5	6.03	2024-08-12	1	2024-08-19	1	31.5	6.03	2024-08-26	1	2024-09-03	1			2025-09-10	1
C-25-125	9	Control	2024-06-10	0	30	4.72	2024-06-17	0	2024-06-24	0	30	4.7	2024-07-01	0	2024-07-10	0	30.5	4.72	2024-07-17	0	2024-07-22	0	30	4.965	2024-07-29	0	2024-08-06	0	30	4.99	2024-08-12	1	2024-08-19	1	30	4.99	2024-08-26	1	2024-09-03	1			2025-09-10	1
C-26-126	8	Control	2024-06-10	0	37	3.77	2024-06-17	0	2024-06-24	0	37	4.1	2024-07-01	0	2024-07-10	0	37.5	4.31	2024-07-17	0	2024-07-22	0	37.5	4.69	2024-07-29	0	2024-08-06	1	37.5	4.7	2024-08-12	1	2024-08-19	1	37.5	4.7	2024-08-26	1	2024-09-03	1			2025-09-10	1
C-26-127	7	Control	2024-06-10	0	32	3.4	2024-06-17	0	2024-06-24	0	32	4.2	2024-07-01	0	2024-07-10	0	32	4.4	2024-07-17	0	2024-07-22	0	32	4.49	2024-07-29	1	2024-08-06	1	32	4.5	2024-08-12	1	2024-08-19	1			2024-08-26	1	2024-09-03	1			2025-09-10	1
C-26-128	8	Control	2024-06-10	0	36	3.1	2024-06-17	0	2024-06-24	0	35	3.6	2024-07-01	0	2024-07-10	0	36	3.7	2024-07-17	0	2024-07-22	0	35.5	3.845	2024-07-29	0	2024-08-06	1	35.5	3.845	2024-08-12	1	2024-08-19	1	35.5	3.845	2024-08-26	1	2024-09-03	1			2025-09-10	1
C-26-129	8	Control	2024-06-10	0	33	4.07	2024-06-17	0	2024-06-24	0	33	4.3	2024-07-01	0	2024-07-10	0	33	4.6	2024-07-17	0	2024-07-22	0	33	4.61	2024-07-29	0	2024-08-06	1	33	4.61	2024-08-12	1	2024-08-19	1	33	4.61	2024-08-26	1	2024-09-03	1			2025-09-10	1
C-26-130	8	Control	2024-06-10	0	39	3.9	2024-06-17	0	2024-06-24	0	39	4.5	2024-07-01	0	2024-07-10	0	38.5	4.6	2024-07-17	0	2024-07-22	0	38	4.63	2024-07-29	0	2024-08-06	1	38	4.63	2024-08-12	1	2024-08-19	1	38	4.63	2024-08-26	1	2024-09-03	1			2025-09-10	1
C-27-131	8	Control	2024-06-10	0	32	3.5	2024-06-17	0	2024-06-24	0	33	3.9	2024-07-01	0	2024-07-10	0	33	4.1	2024-07-17	0	2024-07-22	0	33	4.215	2024-07-29	0	2024-08-06	1	33	4.215	2024-08-12	1	2024-08-19	1	33	4.215	2024-08-26	1	2024-09-03	1			2025-09-10	1
C-27-132	8	Control	2024-06-10	0	42	4.1	2024-06-17	0	2024-06-24	0	42	4.7	2024-07-01	0	2024-07-10	0	42	5.2	2024-07-17	0	2024-07-22	0	42	5.22	2024-07-29	0	2024-08-06	1	42	5.22	2024-08-12	1	2024-08-19	1	42	5.22	2024-08-26	1	2024-09-03	1			2025-09-10	1
C-27-133	8	Control	2024-06-10	0	37	3.6	2024-06-17	0	2024-06-24	0	37	4.1	2024-07-01	0	2024-07-10	0	37	4.3	2024-07-17	0	2024-07-22	0	37	4.79	2024-07-29	0	2024-08-06	1	37	4.81	2024-08-12	1	2024-08-19	1	37	4.81	2024-08-26	1	2024-09-03	1			2025-09-10	1
C-27-134	8	Control	2024-06-10	0	30.5	4.2	2024-06-17	0	2024-06-24	0	31	4.2	2024-07-01	0	2024-07-10	0	31	4.49	2024-07-17	0	2024-07-22	0	31	4.49	2024-07-29	0	2024-08-06	1	31	4.48	2024-08-12	1	2024-08-19	1	31	4.48	2024-08-26	1	2024-09-03	1			2025-09-10	1
C-27-135	8	Control	2024-06-10	0	28	2.89	2024-06-17	0	2024-06-24	0	28	3.56	2024-07-01	0	2024-07-10	0	28	3.71	2024-07-17	0	2024-07-22	0	28	3.75	2024-07-29	0	2024-08-06	1	28	3.75	2024-08-12	1	2024-08-19	1	28	3.75	2024-08-26	1	2024-09-03	1			2025-09-10	1
C-28-136	8	Control	2024-06-10	0	38	4.7	2024-06-17	0	2024-06-24	0	38.5	5.1	2024-07-01	0	2024-07-10	0	39	5.2	2024-07-17	0	2024-07-22	0	39	5.2	2024-07-29	0	2024-08-06	1	39	5.2	2024-08-12	1	2024-08-19	1	39	5.2	2024-08-26	1	2024-09-03	1			2025-09-10	1
C-28-137	7	Control	2024-06-10	0	38.5	4	2024-06-17	0	2024-06-24	0	39	4.3	2024-07-01	0	2024-07-10	0	39	4.54	2024-07-17	0	2024-07-22	0	39	4.475	2024-07-29	1	2024-08-06	1	39	4.45	2024-08-12	1	2024-08-19	1			2024-08-26	1	2024-09-03	1			2025-09-10	1
C-28-138	8	Control	2024-06-10	0	28.5	3.3	2024-06-17	0	2024-06-24	0	28.5	3.6	2024-07-01	0	2024-07-10	0	29	3.82	2024-07-17	0	2024-07-22	0	29	4.015	2024-07-29	0	2024-08-06	1	29	4.015	2024-08-12	1	2024-08-19	1	29	4.015	2024-08-26	1	2024-09-03	1			2025-09-10	1
C-28-139	8	Control	2024-06-10	0	34	4.1	2024-06-17	0	2024-06-24	0	34	4.74	2024-07-01	0	2024-07-10	0	34	4.9	2024-07-17	0	2024-07-22	0	34	5.005	2024-07-29	0	2024-08-06	1	34	5.005	2024-08-12	1	2024-08-19	1	34	5.02	2024-08-26	1	2024-09-03	1			2025-09-10	1
C-28-140	9	Control	2024-06-10	0	30	4	2024-06-17	0	2024-06-24	0	30	4.34	2024-07-01	0	2024-07-10	0	30.5	4.29	2024-07-17	0	2024-07-22	0	30.5	4.265	2024-07-29	0	2024-08-06	0	30.5	4.265	2024-08-12	1	2024-08-19	1	30.5	4.265	2024-08-26	1	2024-09-03	1			2025-09-10	1
C-29-141	8	Control	2024-06-10	0	33	3.7	2024-06-17	0	2024-06-24	0	33.5	4.1	2024-07-01	0	2024-07-10	0	33.5	4.38	2024-07-17	0	2024-07-22	0	33.5	4.42	2024-07-29	0	2024-08-06	1	33.5	4.42	2024-08-12	1	2024-08-19	1	33.5	4.42	2024-08-26	1	2024-09-03	1			2025-09-10	1
C-29-142	8	Control	2024-06-10	0	29	4.1	2024-06-17	0	2024-06-24	0	30	4.3	2024-07-01	0	2024-07-10	0	30	4.33	2024-07-17	0	2024-07-22	0	29.5	4.325	2024-07-29	0	2024-08-06	1	29.5	4.325	2024-08-12	1	2024-08-19	1	29.5	4.325	2024-08-26	1	2024-09-03	1			2025-09-10	1
C-29-143	8	Control	2024-06-10	0	30	3.5	2024-06-17	0	2024-06-24	0	30	3.93	2024-07-01	0	2024-07-10	0	30	4.12	2024-07-17	0	2024-07-22	0	30	4.19	2024-07-29	0	2024-08-06	1	30	4.19	2024-08-12	1	2024-08-19	1	30	4.19	2024-08-26	1	2024-09-03	1			2025-09-10	1
C-29-144	8	Control	2024-06-10	0	42	4.4	2024-06-17	0	2024-06-24	0	42	4.56	2024-07-01	0	2024-07-10	0	42	4.7	2024-07-17	0	2024-07-22	0	42	5.02	2024-07-29	0	2024-08-06	1	42	5.02	2024-08-12	1	2024-08-19	1	42	5.02	2024-08-26	1	2024-09-03	1			2025-09-10	1
C-29-145	8	Control	2024-06-10	0	33	3.4	2024-06-17	0	2024-06-24	0	33	3.9	2024-07-01	0	2024-07-10	0	33	4.06	2024-07-17	0	2024-07-22	0	33	4.29	2024-07-29	0	2024-08-06	1	33	4.29	2024-08-12	1	2024-08-19	1	33	4.29	2024-08-26	1	2024-09-03	1			2025-09-10	1
C-30-146	8	Control	2024-06-10	0	24	3.9	2024-06-17	0	2024-06-24	0	25	4.3	2024-07-01	0	2024-07-10	0	25	4.35	2024-07-17	0	2024-07-22	0	25	4.375	2024-07-29	0	2024-08-06	1	25	4.37	2024-08-12	1	2024-08-19	1	25	4.37	2024-08-26	1	2024-09-03	1			2025-09-10	1
C-30-147	8	Control	2024-06-10	0	25.5	3	2024-06-17	0	2024-06-24	0	26	3.02	2024-07-01	0	2024-07-10	0	26	3.1	2024-07-17	0	2024-07-22	0	26	3.235	2024-07-29	0	2024-08-06	1	26	3.235	2024-08-12	1	2024-08-19	1	26	3.235	2024-08-26	1	2024-09-03	1			2025-09-10	1
C-30-148	8	Control	2024-06-10	0	28	3.5	2024-06-17	0	2024-06-24	0	28	4	2024-07-01	0	2024-07-10	0	28	4.1	2024-07-17	0	2024-07-22	0	28	4.205	2024-07-29	0	2024-08-06	1	28	4.205	2024-08-12	1	2024-08-19	1	28	4.205	2024-08-26	1	2024-09-03	1			2025-09-10	1
C-30-149	10	Control	2024-06-10	0	24	4	2024-06-17	0	2024-06-24	0	24.5	4.3	2024-07-01	0	2024-07-10	0	24.5	4.4	2024-07-17	0	2024-07-22	0	24.5	4.39	2024-07-29	0	2024-08-06	0	24.5	4.39	2024-08-12	0	2024-08-19	1	24.5	4.39	2024-08-26	1	2024-09-03	1			2025-09-10	1
C-30-150	8	Control	2024-06-10	0	29.5	3.7	2024-06-17	0	2024-06-24	0	29.5	4.1	2024-07-01	0	2024-07-10	0	29	4.5	2024-07-17	0	2024-07-22	0	29	4.455	2024-07-29	0	2024-08-06	1	29	4.455	2024-08-12	1	2024-08-19	1	29	4.455	2024-08-26	1	2024-09-03	1			2025-09-10	1
C-31-151	9	Control	2024-06-10	0	23	3.5	2024-06-17	0	2024-06-24	0	24	3.8	2024-07-01	0	2024-07-10	0	24	3.89	2024-07-17	0	2024-07-22	0	24	3.89	2024-07-29	0	2024-08-06	0	24	3.87	2024-08-12	1	2024-08-19	1	24	3.87	2024-08-26	1	2024-09-03	1			2025-09-10	1
C-31-152	7	Control	2024-06-10	0	30.5	4.3	2024-06-17	0	2024-06-24	0	31	4.8	2024-07-01	0	2024-07-10	0	31	5	2024-07-17	0	2024-07-22	0	31	5.05	2024-07-29	1	2024-08-06	1	31	5.05	2024-08-12	1	2024-08-19	1			2024-08-26	1	2024-09-03	1			2025-09-10	1
C-31-153	7	Control	2024-06-10	0	33.5	4	2024-06-17	0	2024-06-24	0	33.5	4.51	2024-07-01	0	2024-07-10	0	33.5	4.6	2024-07-17	0	2024-07-22	0	33.5	4.6	2024-07-29	1	2024-08-06	1	33.5	4.6	2024-08-12	1	2024-08-19	1			2024-08-26	1	2024-09-03	1			2025-09-10	1
C-31-154	7	Control	2024-06-10	0	37	4.2	2024-06-17	0	2024-06-24	0	37	4.5	2024-07-01	0	2024-07-10	0	37	4.6	2024-07-17	0	2024-07-22	0	37	4.705	2024-07-29	1	2024-08-06	1	37	4.72	2024-08-12	1	2024-08-19	1			2024-08-26	1	2024-09-03	1			2025-09-10	1
C-31-155	8	Control	2024-06-10	0	27.5	3.6	2024-06-17	0	2024-06-24	0	28	3.9	2024-07-01	0	2024-07-10	0	29.5	4	2024-07-17	0	2024-07-22	0	28.5	4.3	2024-07-29	0	2024-08-06	1	28.5	4.35	2024-08-12	1	2024-08-19	1	28.5	4.35	2024-08-26	1	2024-09-03	1			2025-09-10	1
C-32-156	9	Control	2024-06-10	0	34.5	4.2	2024-06-17	0	2024-06-24	0	35	4.27	2024-07-01	0	2024-07-10	0	35	4.39	2024-07-17	0	2024-07-22	0	35	4.54	2024-07-29	0	2024-08-06	0	35	4.54	2024-08-12	1	2024-08-19	1	35	4.54	2024-08-26	1	2024-09-03	1			2025-09-10	1
C-32-157	10	Control	2024-06-10	0	33	4.5	2024-06-17	0	2024-06-24	0	33.5	4.7	2024-07-01	0	2024-07-10	0	34	4.76	2024-07-17	0	2024-07-22	0	34	4.86	2024-07-29	0	2024-08-06	0	34	4.86	2024-08-12	0	2024-08-19	1	34	4.86	2024-08-26	1	2024-09-03	1			2025-09-10	1
C-32-158	10	Control	2024-06-10	0	34	4.49	2024-06-17	0	2024-06-24	0	34.5	4.9	2024-07-01	0	2024-07-10	0	34.5	5.23	2024-07-17	0	2024-07-22	0	34.5	5.29	2024-07-29	0	2024-08-06	0	34.5	5.29	2024-08-12	0	2024-08-19	1	34.5	5.29	2024-08-26	1	2024-09-03	1			2025-09-10	1
C-32-159	10	Control	2024-06-10	0	34	4.85	2024-06-17	0	2024-06-24	0	34	4.99	2024-07-01	0	2024-07-10	0	34.5	5.2	2024-07-17	0	2024-07-22	0	34.5	5.25	2024-07-29	0	2024-08-06	0	34.5	5.25	2024-08-12	0	2024-08-19	1	34.5	5.25	2024-08-26	1	2024-09-03	1			2025-09-10	1
C-32-160	10	Control	2024-06-10	0	34	5.45	2024-06-17	0	2024-06-24	0	34.5	5.5	2024-07-01	0	2024-07-10	0	34.5	5.45	2024-07-17	0	2024-07-22	0	34.5	5.575	2024-07-29	0	2024-08-06	0	34.5	5.575	2024-08-12	0	2024-08-19	1	34.5	5.575	2024-08-26	1	2024-09-03	1			2025-09-10	1
C-33-161	8	Control	2024-06-10	0	35	4.89	2024-06-17	0	2024-06-24	0	35	5.13	2024-07-01	0	2024-07-10	0	35	5.16	2024-07-17	0	2024-07-22	0	35	5.16	2024-07-29	0	2024-08-06	1	35	5.16	2024-08-12	1	2024-08-19	1	35	5.16	2024-08-26	1	2024-09-03	1			2025-09-10	1
C-33-162	8	Control	2024-06-10	0	23	5.09	2024-06-17	0	2024-06-24	0	23	5.2	2024-07-01	0	2024-07-10	0	23	5.22	2024-07-17	0	2024-07-22	0	23	5.23	2024-07-29	0	2024-08-06	1	23	5.23	2024-08-12	1	2024-08-19	1	23	5.23	2024-08-26	1	2024-09-03	1			2025-09-10	1
C-33-163	9	Control	2024-06-10	0	35.5	5.52	2024-06-17	0	2024-06-24	0	35.5	5.78	2024-07-01	0	2024-07-10	0	36	5.78	2024-07-17	0	2024-07-22	0	36	5.78	2024-07-29	0	2024-08-06	0	36	5.79	2024-08-12	1	2024-08-19	1	36	5.79	2024-08-26	1	2024-09-03	1			2025-09-10	1
C-33-164	8	Control	2024-06-10	0	38.5	6.54	2024-06-17	0	2024-06-24	0	38	6.83	2024-07-01	0	2024-07-10	0	39	6.84	2024-07-17	0	2024-07-22	0	39	6.82	2024-07-29	0	2024-08-06	1	39	6.84	2024-08-12	1	2024-08-19	1	39	6.84	2024-08-26	1	2024-09-03	1			2025-09-10	1
C-33-165	8	Control	2024-06-10	0	39	5	2024-06-17	0	2024-06-24	0	39	5.14	2024-07-01	0	2024-07-10	0	39	5.23	2024-07-17	0	2024-07-22	0	39	5.205	2024-07-29	0	2024-08-06	1	39	5.22	2024-08-12	1	2024-08-19	1	39	5.22	2024-08-26	1	2024-09-03	1			2025-09-10	1
C-34-166	10	Control	2024-06-10	0	26.5	3.6	2024-06-17	0	2024-06-24	0	26.5	3.8	2024-07-01	0	2024-07-10	0	26.5	3.88	2024-07-17	0	2024-07-22	0	26.5	3.91	2024-07-29	0	2024-08-06	0	26.5	3.91	2024-08-12	0	2024-08-19	1	26.5	3.91	2024-08-26	1	2024-09-03	1			2025-09-10	1
C-34-167	8	Control	2024-06-10	0	38.5	3.96	2024-06-17	0	2024-06-24	0	40	4.1	2024-07-01	0	2024-07-10	0	40	4.1	2024-07-17	0	2024-07-22	0	40	4.145	2024-07-29	0	2024-08-06	1	40	4.145	2024-08-12	1	2024-08-19	1	40	4.145	2024-08-26	1	2024-09-03	1			2025-09-10	1
C-34-168	11	Control	2024-06-10	0	32	4.3	2024-06-17	0	2024-06-24	0	32	4.4	2024-07-01	0	2024-07-10	0	32	4.6	2024-07-17	0	2024-07-22	0	32	4.62	2024-07-29	0	2024-08-06	0	32	4.62	2024-08-12	0	2024-08-19	0	32	4.62	2024-08-26	1	2024-09-03	1			2025-09-10	1
C-34-169	10	Control	2024-06-10	0	38	4.9	2024-06-17	0	2024-06-24	0	39.5	5.1	2024-07-01	0	2024-07-10	0	38.5	5.1	2024-07-17	0	2024-07-22	0	38.5	5.14	2024-07-29	0	2024-08-06	0	38.5	5.14	2024-08-12	0	2024-08-19	1	38.5	5.14	2024-08-26	1	2024-09-03	1			2025-09-10	1
C-34-170	7	Control	2024-06-10	0	38.5	5.2	2024-06-17	0	2024-06-24	0	39	5.5	2024-07-01	0	2024-07-10	0	39	5.48	2024-07-17	0	2024-07-22	0	39	5.5	2024-07-29	1	2024-08-06	1	39	5.5	2024-08-12	1	2024-08-19	1			2024-08-26	1	2024-09-03	1			2025-09-10	1
C-35-171	9	Control	2024-06-10	0	35	5.32	2024-06-17	0	2024-06-24	0	35	5.43	2024-07-01	0	2024-07-10	0	35	5.45	2024-07-17	0	2024-07-22	0	35	5.5	2024-07-29	0	2024-08-06	0	35	5.51	2024-08-12	1	2024-08-19	1	35	5.51	2024-08-26	1	2024-09-03	1			2025-09-10	1
C-35-172	10	Control	2024-06-10	0	21	4.05	2024-06-17	0	2024-06-24	0	21	4.35	2024-07-01	0	2024-07-10	0	21	4.75	2024-07-17	0	2024-07-22	0	21	4.875	2024-07-29	0	2024-08-06	0	21	4.88	2024-08-12	0	2024-08-19	1	21	4.88	2024-08-26	1	2024-09-03	1			2025-09-10	1
C-35-173	8	Control	2024-06-10	0	38	5.91	2024-06-17	0	2024-06-24	0	38	5.85	2024-07-01	0	2024-07-10	0	38	6.04	2024-07-17	0	2024-07-22	0	38	5.95	2024-07-29	0	2024-08-06	1	38	5.95	2024-08-12	1	2024-08-19	1	38	5.93	2024-08-26	1	2024-09-03	1			2025-09-10	1
C-35-174	8	Control	2024-06-10	0	36.5	5.24	2024-06-17	0	2024-06-24	0	36.5	5.22	2024-07-01	0	2024-07-10	0	36.5	6.34	2024-07-17	0	2024-07-22	0	36.5	6.395	2024-07-29	0	2024-08-06	1	36.5	6.42	2024-08-12	1	2024-08-19	1	36.5	6.42	2024-08-26	1	2024-09-03	1			2025-09-10	1
C-35-175	10	Control	2024-06-10	0	28	4.68	2024-06-17	0	2024-06-24	0	28.5	4.92	2024-07-01	0	2024-07-10	0	28.5	5.4	2024-07-17	0	2024-07-22	0	28.5	5.7	2024-07-29	0	2024-08-06	0	28.5	5.81	2024-08-12	0	2024-08-19	1	28.5	5.81	2024-08-26	1	2024-09-03	1			2025-09-10	1
C-36-176	8	Control	2024-06-10	0	37	3.6	2024-06-17	0	2024-06-24	0	37	3.7	2024-07-01	0	2024-07-10	0	37	3.84	2024-07-17	0	2024-07-22	0	37	3.85	2024-07-29	0	2024-08-06	1	37	3.81	2024-08-12	1	2024-08-19	1	37	3.81	2024-08-26	1	2024-09-03	1			2025-09-10	1
C-36-177	8	Control	2024-06-10	0	31	3.7	2024-06-17	0	2024-06-24	0	31	4.1	2024-07-01	0	2024-07-10	0	31	4.2	2024-07-17	0	2024-07-22	0	31	4.31	2024-07-29	0	2024-08-06	1	31	4.3	2024-08-12	1	2024-08-19	1	31	4.3	2024-08-26	1	2024-09-03	1			2025-09-10	1
C-36-178	8	Control	2024-06-10	0	35	4.28	2024-06-17	0	2024-06-24	0	35	4.7	2024-07-01	0	2024-07-10	0	35.5	4.9	2024-07-17	0	2024-07-22	0	35.5	4.885	2024-07-29	0	2024-08-06	1	35.5	4.9	2024-08-12	1	2024-08-19	1	35.5	4.9	2024-08-26	1	2024-09-03	1			2025-09-10	1
C-36-179	8	Control	2024-06-10	0	34	4.3	2024-06-17	0	2024-06-24	0	35	4.7	2024-07-01	0	2024-07-10	0	35	4.7	2024-07-17	0	2024-07-22	0	35	4.93	2024-07-29	0	2024-08-06	1	35	4.9	2024-08-12	1	2024-08-19	1	35	4.9	2024-08-26	1	2024-09-03	1			2025-09-10	1
C-36-180	8	Control	2024-06-10	0	29.5	3.32	2024-06-17	0	2024-06-24	0	30	3.7	2024-07-01	0	2024-07-10	0	30	4	2024-07-17	0	2024-07-22	0	30.5	4.1	2024-07-29	0	2024-08-06	1	30.5	4.1	2024-08-12	1	2024-08-19	1	30.5	4.1	2024-08-26	1	2024-09-03	1			2025-09-10	1
C-37-181	7	Control	2024-06-10	0	38	4.2	2024-06-17	0	2024-06-24	0	38	4.3	2024-07-01	0	2024-07-10	0	38	4.43	2024-07-17	0	2024-07-22	0	38	4.485	2024-07-29	1	2024-08-06	1	38	4.49	2024-08-12	1	2024-08-19	1			2024-08-26	1	2024-09-03	1			2025-09-10	1
C-37-182	9	Control	2024-06-10	0	24	3.9	2024-06-17	0	2024-06-24	0	24	4.2	2024-07-01	0	2024-07-10	0	24	4.34	2024-07-17	0	2024-07-22	0	24	4.34	2024-07-29	0	2024-08-06	0	24	4.35	2024-08-12	1	2024-08-19	1	24	4.34	2024-08-26	1	2024-09-03	1			2025-09-10	1
C-37-183	9	Control	2024-06-10	0	36	4.79	2024-06-17	0	2024-06-24	0	36	4.9	2024-07-01	0	2024-07-10	0	36.5	4.9	2024-07-17	0	2024-07-22	0	36.5	5	2024-07-29	0	2024-08-06	0	36.5	5.04	2024-08-12	1	2024-08-19	1	36.5	5.04	2024-08-26	1	2024-09-03	1			2025-09-10	1
C-37-184	8	Control	2024-06-10	0	33.5	4.3	2024-06-17	0	2024-06-24	0	34	4.6	2024-07-01	0	2024-07-10	0	34.5	4.61	2024-07-17	0	2024-07-22	0	34.5	4.64	2024-07-29	0	2024-08-06	1	34.5	4.67	2024-08-12	1	2024-08-19	1	34.5	4.67	2024-08-26	1	2024-09-03	1			2025-09-10	1
C-37-185	10	Control	2024-06-10	0	30.5	4.1	2024-06-17	0	2024-06-24	0	30.5	4.4	2024-07-01	0	2024-07-10	0	30.5	4.62	2024-07-17	0	2024-07-22	0	30.5	4.665	2024-07-29	0	2024-08-06	0	30.5	4.665	2024-08-12	0	2024-08-19	1	30.5	4.665	2024-08-26	1	2024-09-03	1			2025-09-10	1
C-38-186	9	Control	2024-06-10	0	35	4.3	2024-06-17	0	2024-06-24	0	35	4.7	2024-07-01	0	2024-07-10	0	35	4.9	2024-07-17	0	2024-07-22	0	35	5.045	2024-07-29	0	2024-08-06	0	35	5.03	2024-08-12	1	2024-08-19	1	35	5.03	2024-08-26	1	2024-09-03	1			2025-09-10	1
C-38-187	8	Control	2024-06-10	0	23.5	2.8	2024-06-17	0	2024-06-24	0	25	3.4	2024-07-01	0	2024-07-10	0	24	3.5	2024-07-17	0	2024-07-22	0	24	3.7	2024-07-29	0	2024-08-06	1	24	3.67	2024-08-12	1	2024-08-19	1			2024-08-26	1	2024-09-03	1			2025-09-10	1
C-38-188	9	Control	2024-06-10	0	31	3.7	2024-06-17	0	2024-06-24	0	31	4	2024-07-01	0	2024-07-10	0	31	4.04	2024-07-17	0	2024-07-22	0	31	4.065	2024-07-29	0	2024-08-06	0	31	4.07	2024-08-12	1	2024-08-19	1	31	4.07	2024-08-26	1	2024-09-03	1			2025-09-10	1
C-38-189	8	Control	2024-06-10	0	36.5	4.1	2024-06-17	0	2024-06-24	0	37	4.3	2024-07-01	0	2024-07-10	0	37	4.4	2024-07-17	0	2024-07-22	0	37	4.51	2024-07-29	0	2024-08-06	1	37	4.5	2024-08-12	1	2024-08-19	1			2024-08-26	1	2024-09-03	1			2025-09-10	1
C-38-190	9	Control	2024-06-10	0	30	4.2	2024-06-17	0	2024-06-24	0	30	4.5	2024-07-01	0	2024-07-10	0	30	4.6	2024-07-17	0	2024-07-22	0	30	4.69	2024-07-29	0	2024-08-06	0	30	4.71	2024-08-12	1	2024-08-19	1	30	4.71	2024-08-26	1	2024-09-03	1			2025-09-10	1
C-39-191	10	Control	2024-06-10	0	32	3.8	2024-06-17	0	2024-06-24	0	32	4.2	2024-07-01	0	2024-07-10	0	32	4.55	2024-07-17	0	2024-07-22	0	32	4.76	2024-07-29	0	2024-08-06	0	32	4.78	2024-08-12	0	2024-08-19	1	32	4.78	2024-08-26	1	2024-09-03	1			2025-09-10	1
C-39-192	7	Control	2024-06-10	0	34	3.9	2024-06-17	0	2024-06-24	0	34	4.3	2024-07-01	0	2024-07-10	0	34	4.5	2024-07-17	0	2024-07-22	0	34	4.64	2024-07-29	1	2024-08-06	1	34	4.64	2024-08-12	1	2024-08-19	1			2024-08-26	1	2024-09-03	1			2025-09-10	1
C-39-193	7	Control	2024-06-10	0	35.5	4.3	2024-06-17	0	2024-06-24	0	35.5	4.3	2024-07-01	0	2024-07-10	0	35.5	4.4	2024-07-17	0	2024-07-22	0	35.5	4.47	2024-07-29	1	2024-08-06	1	35.5	4.49	2024-08-12	1	2024-08-19	1			2024-08-26	1	2024-09-03	1			2025-09-10	1
C-39-194	9	Control	2024-06-10	0	36.5	3.7	2024-06-17	0	2024-06-24	0	37	4.1	2024-07-01	0	2024-07-10	0	37	4.1	2024-07-17	0	2024-07-22	0	37	4.32	2024-07-29	0	2024-08-06	0	37	4.33	2024-08-12	1	2024-08-19	1	37	4.33	2024-08-26	1	2024-09-03	1			2025-09-10	1
C-39-195	8	Control	2024-06-10	0	34	3.7	2024-06-17	0	2024-06-24	0	34	4	2024-07-01	0	2024-07-10	0	35	4.15	2024-07-17	0	2024-07-22	0	35	4.16	2024-07-29	0	2024-08-06	1	35	4.16	2024-08-12	1	2024-08-19	1	35	4.16	2024-08-26	1	2024-09-03	1			2025-09-10	1
C-40-196	8	Control	2024-06-10	0	40	3.6	2024-06-17	0	2024-06-24	0	40	4	2024-07-01	0	2024-07-10	0	41	4.2	2024-07-17	0	2024-07-22	0	41	4.43	2024-07-29	0	2024-08-06	1	41	4.43	2024-08-12	1	2024-08-19	1			2024-08-26	1	2024-09-03	1			2025-09-10	1
C-40-197	9	Control	2024-06-10	0	28.5	4.6	2024-06-17	0	2024-06-24	0	28.5	4.9	2024-07-01	0	2024-07-10	0	29	5	2024-07-17	0	2024-07-22	0	29	5.1	2024-07-29	0	2024-08-06	0	29	5.11	2024-08-12	1	2024-08-19	1	29	5.11	2024-08-26	1	2024-09-03	1			2025-09-10	1
D-61-01	7	Deposit	2024-06-10	0	33	4.56	2024-06-17	0	2024-06-24	0	33	4.8	2024-07-01	0	2024-07-10	0	33	4.9	2024-07-17	0	2024-07-22	0	33	5.025	2024-07-29	1	2024-08-06	1	33	5.02	2024-08-12	1	2024-08-19	1			2024-08-26	1	2024-09-03	1			2025-09-10	1
D-61-02	7	Deposit	2024-06-10	0	35	4.9	2024-06-17	0	2024-06-24	0	35	5.5	2024-07-01	0	2024-07-10	0	35	5.7	2024-07-17	0	2024-07-22	0	35	5.875	2024-07-29	1	2024-08-06	1	35	5.88	2024-08-12	1	2024-08-19	1			2024-08-26	1	2024-09-03	1			2025-09-10	1
D-61-03	7	Deposit	2024-06-10	0	30	6.9	2024-06-17	0	2024-06-24	0	30	7	2024-07-01	0	2024-07-10	0	30	7.01	2024-07-17	0	2024-07-22	0	30	7	2024-07-29	1	2024-08-06	1	30	7.02	2024-08-12	1	2024-08-19	1			2024-08-26	1	2024-09-03	1			2025-09-10	1
D-61-04	8	Deposit	2024-06-10	0	37	4.9	2024-06-17	0	2024-06-24	0	37.5	5.1	2024-07-01	0	2024-07-10	0	37.5	5.22	2024-07-17	0	2024-07-22	0	37.5	5.285	2024-07-29	0	2024-08-06	1	37.5	5.285	2024-08-12	1	2024-08-19	1	37	5.285	2024-08-26	1	2024-09-03	1			2025-09-10	1
D-61-05	8	Deposit	2024-06-10	0	34	5.1	2024-06-17	0	2024-06-24	0	34	5.2	2024-07-01	0	2024-07-10	0	34	5.2	2024-07-17	0	2024-07-22	0	34	5.31	2024-07-29	0	2024-08-06	1	34	5.31	2024-08-12	1	2024-08-19	1	34	5.31	2024-08-26	1	2024-09-03	1			2025-09-10	1
D-62-06	9	Deposit	2024-06-10	0	39.5	5.73	2024-06-17	0	2024-06-24	0	40	5.9	2024-07-01	0	2024-07-10	0	41	6.1	2024-07-17	0	2024-07-22	0	41.5	6.1	2024-07-29	0	2024-08-06	0	41.5	6.1	2024-08-12	1	2024-08-19	1	41.5	6.13	2024-08-26	1	2024-09-03	1			2025-09-10	1
D-62-07	7	Deposit	2024-06-10	0	38.5	5.24	2024-06-17	0	2024-06-24	0	38.5	5.61	2024-07-01	0	2024-07-10	0	38.5	5.81	2024-07-17	0	2024-07-22	0	38.5	5.83	2024-07-29	1	2024-08-06	1	38.5	5.83	2024-08-12	1	2024-08-19	1			2024-08-26	1	2024-09-03	1			2025-09-10	1
D-62-08	8	Deposit	2024-06-10	0	34.5	3.92	2024-06-17	0	2024-06-24	0	34.5	3.98	2024-07-01	0	2024-07-10	0	35	4.2	2024-07-17	0	2024-07-22	0	35	4.23	2024-07-29	0	2024-08-06	0	35	4.21	2024-08-12	0	2024-08-19	0	35	4.24	2024-08-26	1	2024-09-03	1			2025-09-10	1
D-62-09	8	Deposit	2024-06-10	0	34	5.1	2024-06-17	0	2024-06-24	0	34	5.24	2024-07-01	0	2024-07-10	0	36	5.38	2024-07-17	0	2024-07-22	0	36	5.4	2024-07-29	0	2024-08-06	0	36	5.42	2024-08-12	1	2024-08-19	1	36	5.42	2024-08-26	1	2024-09-03	1			2025-09-10	1
D-62-10	8	Deposit	2024-06-10	0	32	5.44	2024-06-17	0	2024-06-24	0	32.5	5.7	2024-07-01	0	2024-07-10	0	33	5.81	2024-07-17	0	2024-07-22	0	33	6	2024-07-29	0	2024-08-06	1	33	6.02	2024-08-12	1	2024-08-19	1	33	6.02	2024-08-26	1	2024-09-03	1			2025-09-10	1
D-63-11	7	Deposit	2024-06-10	0	27	4.1	2024-06-17	0	2024-06-24	0	27	4.4	2024-07-01	0	2024-07-10	0	27	4.5	2024-07-17	0	2024-07-22	0	27	4.57	2024-07-29	1	2024-08-06	1	27	4.56	2024-08-12	1	2024-08-19	1			2024-08-26	1	2024-09-03	1			2025-09-10	1
D-63-12	8	Deposit	2024-06-10	0	20	4.2	2024-06-17	0	2024-06-24	0	20	4.3	2024-07-01	0	2024-07-10	0	21	4.4	2024-07-17	0	2024-07-22	0	21	4.505	2024-07-29	0	2024-08-06	1	21	4.505	2024-08-12	1	2024-08-19	1	21	4.505	2024-08-26	1	2024-09-03	1			2025-09-10	1
D-63-13	9	Deposit	2024-06-10	0	27	3.5	2024-06-17	0	2024-06-24	0	28	3.7	2024-07-01	0	2024-07-10	0	28.5	3.8	2024-07-17	0	2024-07-22	0	28.5	3.835	2024-07-29	0	2024-08-06	0	28.5	3.835	2024-08-12	1	2024-08-19	1	28.5	3.835	2024-08-26	1	2024-09-03	1			2025-09-10	1
D-63-14	9	Deposit	2024-06-10	0	33.5	4	2024-06-17	0	2024-06-24	0	33.5	4.52	2024-07-01	0	2024-07-10	0	34	4.7	2024-07-17	0	2024-07-22	0	34	4.735	2024-07-29	0	2024-08-06	0	34	4.735	2024-08-12	1	2024-08-19	1	34	4.735	2024-08-26	1	2024-09-03	1			2025-09-10	1
D-63-15	8	Deposit	2024-06-10	0	30	4.2	2024-06-17	0	2024-06-24	0	30	4.6	2024-07-01	0	2024-07-10	0	30.5	4.9	2024-07-17	0	2024-07-22	0	30.5	4.98	2024-07-29	0	2024-08-06	1	30.5	4.98	2024-08-12	1	2024-08-19	1	30.5	4.98	2024-08-26	1	2024-09-03	1			2025-09-10	1
D-64-16	8	Deposit	2024-06-10	0	32	5	2024-06-17	0	2024-06-24	0	32	5.2	2024-07-01	0	2024-07-10	0	32.5	5.2	2024-07-17	0	2024-07-22	0	32.5	5.19	2024-07-29	0	2024-08-06	1	32.5	5.2	2024-08-12	1	2024-08-19	1	32.5	5.2	2024-08-26	1	2024-09-03	1			2025-09-10	1
D-64-17	10	Deposit	2024-06-10	0	31	3.8	2024-06-17	0	2024-06-24	0	31	3.9	2024-07-01	0	2024-07-10	0	31.5	4.3	2024-07-17	0	2024-07-22	0	31.5	4.375	2024-07-29	0	2024-08-06	0	31.5	4.39	2024-08-12	0	2024-08-19	1	31.5	4.39	2024-08-26	1	2024-09-03	1			2025-09-10	1
D-64-18	10	Deposit	2024-06-10	0	34.5	3.5	2024-06-17	0	2024-06-24	0	34.5	4.4	2024-07-01	0	2024-07-10	0	35	4.6	2024-07-17	0	2024-07-22	0	35	4.6	2024-07-29	0	2024-08-06	0	35	4.61	2024-08-12	0	2024-08-19	1	35	4.61	2024-08-26	1	2024-09-03	1			2025-09-10	1
D-64-19	8	Deposit	2024-06-10	0	37	4.4	2024-06-17	0	2024-06-24	0	37	4.7	2024-07-01	0	2024-07-10	0	37	5	2024-07-17	0	2024-07-22	0	37	5.1	2024-07-29	0	2024-08-06	1	37	5.22	2024-08-12	1	2024-08-19	1	37	5.22	2024-08-26	1	2024-09-03	1			2025-09-10	1
D-64-20	10	Deposit	2024-06-10	0	29	4.59	2024-06-17	0	2024-06-24	0	29	4.7	2024-07-01	0	2024-07-10	0	28.5	4.7	2024-07-17	0	2024-07-22	0	28.5	4.875	2024-07-29	0	2024-08-06	0	28.5	4.9	2024-08-12	0	2024-08-19	1	28.5	4.9	2024-08-26	1	2024-09-03	1			2025-09-10	1
D-65-21	7	Deposit	2024-06-10	0	34	4.24	2024-06-17	0	2024-06-24	0	34	4.32	2024-07-01	0	2024-07-10	0	34.5	4.33	2024-07-17	0	2024-07-22	0	34.5	4.34	2024-07-29	1	2024-08-06	1	34.5	4.34	2024-08-12	1	2024-08-19	1			2024-08-26	1	2024-09-03	1			2025-09-10	1
D-65-22	8	Deposit	2024-06-10	0	41.5	5.3	2024-06-17	0	2024-06-24	0	42	5.67	2024-07-01	0	2024-07-10	0	42	5.8	2024-07-17	0	2024-07-22	0	42	5.85	2024-07-29	0	2024-08-06	1	42	5.88	2024-08-12	1	2024-08-19	1	42	5.87	2024-08-26	1	2024-09-03	1			2025-09-10	1
D-65-23	7	Deposit	2024-06-10	0	40.5	6.2	2024-06-17	0	2024-06-24	0	40.5	6.29	2024-07-01	0	2024-07-10	0	41	6.3	2024-07-17	0	2024-07-22	0	41	6.435	2024-07-29	1	2024-08-06	1	41	6.45	2024-08-12	1	2024-08-19	1			2024-08-26	1	2024-09-03	1			2025-09-10	1
D-65-24	8	Deposit	2024-06-10	0	25	4.48	2024-06-17	0	2024-06-24	0	26	4.82	2024-07-01	0	2024-07-10	0	26	5.53	2024-07-17	0	2024-07-22	0	26	5.43	2024-07-29	0	2024-08-06	0	26	5.42	2024-08-12	1	2024-08-19	1	26	5.42	2024-08-26	1	2024-09-03	1			2025-09-10	1
D-65-25	6	Deposit	2024-06-10	0	41	5.52	2024-06-17	0	2024-06-24	0	41	5.9	2024-07-01	0	2024-07-10	0	41	6.1	2024-07-17	0	2024-07-22	1	41	6.32	2024-07-29	1	2024-08-06	1			2024-08-12	1	2024-08-19	1			2024-08-26	1	2024-09-03	1			2025-09-10	1
D-66-26	7	Deposit	2024-06-10	0	33	4.44	2024-06-17	0	2024-06-24	0	33	4.67	2024-07-01	0	2024-07-10	0	33	4.7	2024-07-17	0	2024-07-22	0	33	4.7	2024-07-29	1	2024-08-06	1	33	4.69	2024-08-12	1	2024-08-19	1			2024-08-26	1	2024-09-03	1			2025-09-10	1
D-66-27	7	Deposit	2024-06-10	0	28	3.94	2024-06-17	0	2024-06-24	0	29	4.03	2024-07-01	0	2024-07-10	0	28.5	4.53	2024-07-17	0	2024-07-22	0	28.5	4.5	2024-07-29	1	2024-08-06	1	28.5	4.66	2024-08-12	1	2024-08-19	1			2024-08-26	1	2024-09-03	1			2025-09-10	1
D-66-28	7	Deposit	2024-06-10	0	36	4.6	2024-06-17	0	2024-06-24	0	36	5	2024-07-01	0	2024-07-10	0	36	5.03	2024-07-17	0	2024-07-22	0	36	5.07	2024-07-29	1	2024-08-06	1	36	5.07	2024-08-12	1	2024-08-19	1			2024-08-26	1	2024-09-03	1			2025-09-10	1
D-66-29	9	Deposit	2024-06-10	0	38	3.92	2024-06-17	0	2024-06-24	0	38	4.1	2024-07-01	0	2024-07-10	0	38	4.14	2024-07-17	0	2024-07-22	0	38	4.155	2024-07-29	0	2024-08-06	0	38	4.16	2024-08-12	1	2024-08-19	1	38	4.16	2024-08-26	1	2024-09-03	1			2025-09-10	1
D-66-30	9	Deposit	2024-06-10	0	28	4.44	2024-06-17	0	2024-06-24	0	28	4.5	2024-07-01	0	2024-07-10	0	28.5	4.6	2024-07-17	0	2024-07-22	0	28.5	4.63	2024-07-29	0	2024-08-06	0	28.5	4.63	2024-08-12	1	2024-08-19	1	28.5	4.63	2024-08-26	1	2024-09-03	1			2025-09-10	1
D-67-31	7	Deposit	2024-06-10	0	36	4.9	2024-06-17	0	2024-06-24	0	36.5	5.3	2024-07-01	0	2024-07-10	0	37	5.5	2024-07-17	0	2024-07-22	0	37	5.55	2024-07-29	1	2024-08-06	1	37	5.56	2024-08-12	1	2024-08-19	1			2024-08-26	1	2024-09-03	1			2025-09-10	1
D-67-32	7	Deposit	2024-06-10	0	30	5.3	2024-06-17	0	2024-06-24	0	30	5.4	2024-07-01	0	2024-07-10	0	31	5.75	2024-07-17	0	2024-07-22	0	31	5.8	2024-07-29	1	2024-08-06	1	31	5.8	2024-08-12	1	2024-08-19	1			2024-08-26	1	2024-09-03	1			2025-09-10	1
D-67-33	8	Deposit	2024-06-10	0	36.5	5.7	2024-06-17	0	2024-06-24	0	37	5.9	2024-07-01	0	2024-07-10	0	37	6.35	2024-07-17	0	2024-07-22	0	37	6.395	2024-07-29	0	2024-08-06	0	37	6.395	2024-08-12	1	2024-08-19	1	37	6.395	2024-08-26	1	2024-09-03	1			2025-09-10	1
D-67-34	8	Deposit	2024-06-10	0	38.5	5.22	2024-06-17	0	2024-06-24	0	40	5.24	2024-07-01	0	2024-07-10	0	40	5.25	2024-07-17	0	2024-07-22	0	40	5.25	2024-07-29	0	2024-08-06	0	40	5.25	2024-08-12	1	2024-08-19	1	40	5.26	2024-08-26	1	2024-09-03	1			2025-09-10	1
D-67-35	8	Deposit	2024-06-10	0	33.5	5.8	2024-06-17	0	2024-06-24	0	33.5	6.2	2024-07-01	0	2024-07-10	0	33.5	6.23	2024-07-17	0	2024-07-22	0	33.5	6.29	2024-07-29	0	2024-08-06	1	33.5	6.3	2024-08-12	1	2024-08-19	1			2024-08-26	1	2024-09-03	1			2025-09-10	1
D-68-36	8	Deposit	2024-06-10	0	26	5.1	2024-06-17	0	2024-06-24	0	26	5.6	2024-07-01	0	2024-07-10	0	26	5.8	2024-07-17	0	2024-07-22	0	26	5.885	2024-07-29	0	2024-08-06	1	26	5.885	2024-08-12	1	2024-08-19	1	26	5.885	2024-08-26	1	2024-09-03	1			2025-09-10	1
D-68-37	8	Deposit	2024-06-10	0	32	4.7	2024-06-17	0	2024-06-24	0	32	4.96	2024-07-01	0	2024-07-10	0	32	4.99	2024-07-17	0	2024-07-22	0	32	5	2024-07-29	0	2024-08-06	1	32	5	2024-08-12	1	2024-08-19	0	32	5.03	2024-08-26	1	2024-09-03	1			2025-09-10	1
D-68-38	8	Deposit	2024-06-10	0	31	4.8	2024-06-17	0	2024-06-24	0	31	5.11	2024-07-01	0	2024-07-10	0	31	5.2	2024-07-17	0	2024-07-22	0	31	5.19	2024-07-29	0	2024-08-06	1	31	5.195	2024-08-12	1	2024-08-19	1	31	5.195	2024-08-26	1	2024-09-03	1			2025-09-10	1
D-68-39	9	Deposit	2024-06-10	0	38.5	5.5	2024-06-17	0	2024-06-24	0	39	5.63	2024-07-01	0	2024-07-10	0	39	5.7	2024-07-17	0	2024-07-22	0	39	6.06	2024-07-29	0	2024-08-06	0	39	6.07	2024-08-12	1	2024-08-19	1	39	6.04	2024-08-26	1	2024-09-03	1			2025-09-10	1
D-68-40	9	Deposit	2024-06-10	0	29	4.67	2024-06-17	0	2024-06-24	0	29	4.9	2024-07-01	0	2024-07-10	0	29.5	5.11	2024-07-17	0	2024-07-22	0	29.5	5.73	2024-07-29	0	2024-08-06	0	29.5	5.74	2024-08-12	1	2024-08-19	1	29.5	5.74	2024-08-26	1	2024-09-03	1			2025-09-10	1
D-69-41	8	Deposit	2024-06-10	0	29	4.72	2024-06-17	0	2024-06-24	0	29	4.7	2024-07-01	0	2024-07-10	0	29.5	4.71	2024-07-17	0	2024-07-22	0	29.5	4.72	2024-07-29	0	2024-08-06	1	29.5	4.73	2024-08-12	1	2024-08-19	1	29.5	4.72	2024-08-26	1	2024-09-03	1			2025-09-10	1
D-69-42	7	Deposit	2024-06-10	0	34	4.3	2024-06-17	0	2024-06-24	0	34	4.5	2024-07-01	0	2024-07-10	0	34	4.6	2024-07-17	0	2024-07-22	0	34	4.68	2024-07-29	1	2024-08-06	1	34	4.68	2024-08-12	1	2024-08-19	1			2024-08-26	1	2024-09-03	1			2025-09-10	1
D-69-43	7	Deposit	2024-06-10	0	36	3.9	2024-06-17	0	2024-06-24	0	36	4.5	2024-07-01	0	2024-07-10	0	37	4.8	2024-07-17	0	2024-07-22	0	37	4.92	2024-07-29	1	2024-08-06	1	37	4.92	2024-08-12	1	2024-08-19	1			2024-08-26	1	2024-09-03	1			2025-09-10	1
D-69-44	8	Deposit	2024-06-10	0	25.5	4.41	2024-06-17	0	2024-06-24	0	26	4.7	2024-07-01	0	2024-07-10	0	26	4.8	2024-07-17	0	2024-07-22	0	26	4.815	2024-07-29	0	2024-08-06	1	26	4.84	2024-08-12	1	2024-08-19	1	26	4.84	2024-08-26	1	2024-09-03	1			2025-09-10	1
D-69-45	6	Deposit	2024-06-10	0	39	5.4	2024-06-17	0	2024-06-24	0	39.5	5.5	2024-07-01	0	2024-07-10	0	39.5	5.54	2024-07-17	0	2024-07-22	1	39.5	5.56	2024-07-29	1	2024-08-06	1			2024-08-12	1	2024-08-19	1			2024-08-26	1	2024-09-03	1			2025-09-10	1
D-70-46	7	Deposit	2024-06-10	0	38	4	2024-06-17	0	2024-06-24	0	38	4.15	2024-07-01	0	2024-07-10	0	39	4.28	2024-07-17	0	2024-07-22	0	39	4.285	2024-07-29	1	2024-08-06	1	39	4.31	2024-08-12	1	2024-08-19	1			2024-08-26	1	2024-09-03	1			2025-09-10	1
D-70-47	8	Deposit	2024-06-10	0	35	4.41	2024-06-17	0	2024-06-24	0	35	4.47	2024-07-01	0	2024-07-10	0	36	4.5	2024-07-17	0	2024-07-22	0	36	4.615	2024-07-29	0	2024-08-06	1	36	4.615	2024-08-12	1	2024-08-19	1	36	4.615	2024-08-26	1	2024-09-03	1			2025-09-10	1
D-70-48	6	Deposit	2024-06-10	0	35	4.2	2024-06-17	0	2024-06-24	0	35	4.7	2024-07-01	0	2024-07-10	0	36	4.8	2024-07-17	0	2024-07-22	1	36	4.92	2024-07-29	1	2024-08-06	1			2024-08-12	1	2024-08-19	1			2024-08-26	1	2024-09-03	1			2025-09-10	1
D-70-49	9	Deposit	2024-06-10	0	30.5	3.7	2024-06-17	0	2024-06-24	0	30.5	3.9	2024-07-01	0	2024-07-10	0	30.5	4.3	2024-07-17	0	2024-07-22	0	30.5	4.335	2024-07-29	0	2024-08-06	0	30.5	4.33	2024-08-12	1	2024-08-19	1	30.5	4.33	2024-08-26	1	2024-09-03	1			2025-09-10	1
D-70-50	8	Deposit	2024-06-10	0	24.5	3	2024-06-17	0	2024-06-24	0	25	3.3	2024-07-01	0	2024-07-10	0	25	3.3	2024-07-17	0	2024-07-22	0	24.5	3.31	2024-07-29	0	2024-08-06	1	24.5	3.34	2024-08-12	1	2024-08-19	1	24.5	3.35	2024-08-26	1	2024-09-03	1			2025-09-10	1
D-71-51	7	Deposit	2024-06-10	0	39	4.1	2024-06-17	0	2024-06-24	0	39	4.3	2024-07-01	0	2024-07-10	0	39	4.6	2024-07-17	0	2024-07-22	0	39	4.7	2024-07-29	1	2024-08-06	1	39	4.8	2024-08-12	1	2024-08-19	1	39		2024-08-26	1	2024-09-03	1			2025-09-10	1
D-71-52	8	Deposit	2024-06-10	0	33	4.5	2024-06-17	0	2024-06-24	0	32.5	4.6	2024-07-01	0	2024-07-10	0	33	4.7	2024-07-17	0	2024-07-22	0	33	4.7	2024-07-29	0	2024-08-06	1	33	4.74	2024-08-12	1	2024-08-19	1	33	4.74	2024-08-26	1	2024-09-03	1			2025-09-10	1
D-71-53	6	Deposit	2024-06-10	0	35.5	4.9	2024-06-17	0	2024-06-24	0	37	5.4	2024-07-01	0	2024-07-10	0	38.5	5.7	2024-07-17	0	2024-07-22	1	38.5	5.775	2024-07-29	1	2024-08-06	1			2024-08-12	1	2024-08-19	1			2024-08-26	1	2024-09-03	1			2025-09-10	1
D-71-54	6	Deposit	2024-06-10	0	26	4.3	2024-06-17	0	2024-06-24	0	26.5	4.5	2024-07-01	0	2024-07-10	0	26.5	4.5	2024-07-17	0	2024-07-22	1	26.5	4.59	2024-07-29	1	2024-08-06	1			2024-08-12	1	2024-08-19	1			2024-08-26	1	2024-09-03	1			2025-09-10	1
D-71-55	6	Deposit	2024-06-10	0	35	4.3	2024-06-17	0	2024-06-24	0	36	5.1	2024-07-01	0	2024-07-10	0	41.5	5.49	2024-07-17	0	2024-07-22	1	41.5	5.775	2024-07-29	1	2024-08-06	1			2024-08-12	1	2024-08-19	1			2024-08-26	1	2024-09-03	1			2025-09-10	1
D-72-56	9	Deposit	2024-06-10	0	40.5	4	2024-06-17	0	2024-06-24	0	40.5	4.4	2024-07-01	0	2024-07-10	0	41	4.6	2024-07-17	0	2024-07-22	0	41	4.87	2024-07-29	0	2024-08-06	0	41	4.88	2024-08-12	1	2024-08-19	1	41	4.89	2024-08-26	1	2024-09-03	1			2025-09-10	1
D-72-57	9	Deposit	2024-06-10	0	27	4.3	2024-06-17	0	2024-06-24	0	27	4.5	2024-07-01	0	2024-07-10	0	27	4.6	2024-07-17	0	2024-07-22	0	27	4.62	2024-07-29	0	2024-08-06	0	27	4.67	2024-08-12	1	2024-08-19	1	27	4.66	2024-08-26	1	2024-09-03	1			2025-09-10	1
D-72-58	8	Deposit	2024-06-10	0	31	4.2	2024-06-17	0	2024-06-24	0	31	4.4	2024-07-01	0	2024-07-10	0	31.5	4.5	2024-07-17	0	2024-07-22	0	31.5	4.7	2024-07-29	0	2024-08-06	1	31.5	4.81	2024-08-12	1	2024-08-19	1	31.5	4.81	2024-08-26	1	2024-09-03	1			2025-09-10	1
D-72-59	9	Deposit	2024-06-10	0	28.5	3.9	2024-06-17	0	2024-06-24	0	28.5	4.3	2024-07-01	0	2024-07-10	0	28.5	4.5	2024-07-17	0	2024-07-22	0	28.5	4.49	2024-07-29	0	2024-08-06	0	28.5	4.5	2024-08-12	1	2024-08-19	1	28.5	4.5	2024-08-26	1	2024-09-03	1			2025-09-10	1
D-72-60	9	Deposit	2024-06-10	0	29	3.5	2024-06-17	0	2024-06-24	0	29	3.7	2024-07-01	0	2024-07-10	0	30	3.9	2024-07-17	0	2024-07-22	0	30	3.9	2024-07-29	0	2024-08-06	0	30	3.94	2024-08-12	1	2024-08-19	1	30	3.92	2024-08-26	1	2024-09-03	1			2025-09-10	1
D-73-61	10	Deposit	2024-06-10	0	38	4.2	2024-06-17	0	2024-06-24	0	38	4.6	2024-07-01	0	2024-07-10	0	38	5.22	2024-07-17	0	2024-07-22	0	38	5.41	2024-07-29	0	2024-08-06	0	38	5.43	2024-08-12	0	2024-08-19	1	38	5.43	2024-08-26	1	2024-09-03	1			2025-09-10	1
D-73-62	8	Deposit	2024-06-10	0	22	4.8	2024-06-17	0	2024-06-24	0	22	5	2024-07-01	0	2024-07-10	0	22	5.1	2024-07-17	0	2024-07-22	0	22	5.085	2024-07-29	0	2024-08-06	1	22	5.17	2024-08-12	1	2024-08-19	1	22	5.17	2024-08-26	1	2024-09-03	1			2025-09-10	1
D-73-63	9	Deposit	2024-06-10	0	36.5	3.6	2024-06-17	0	2024-06-24	0	36.5	4.1	2024-07-01	0	2024-07-10	0	37	4.2	2024-07-17	0	2024-07-22	0	37	4.355	2024-07-29	0	2024-08-06	0	37	4.35	2024-08-12	1	2024-08-19	1	37	4.35	2024-08-26	1	2024-09-03	1			2025-09-10	1
D-73-64	7	Deposit	2024-06-10	0	37	3.9	2024-06-17	0	2024-06-24	0	37	4.1	2024-07-01	0	2024-07-10	0	37	4.23	2024-07-17	0	2024-07-22	0	38	4.25	2024-07-29	1	2024-08-06	1	38	4.24	2024-08-12	1	2024-08-19	1			2024-08-26	1	2024-09-03	1			2025-09-10	1
D-73-65	7	Deposit	2024-06-10	0	39	4.36	2024-06-17	0	2024-06-24	0	39	4.7	2024-07-01	0	2024-07-10	0	39.5	4.7	2024-07-17	0	2024-07-22	0	39.5	4.71	2024-07-29	1	2024-08-06	1	39.5	4.67	2024-08-12	1	2024-08-19	1			2024-08-26	1	2024-09-03	1			2025-09-10	1
D-74-66	7	Deposit	2024-06-10	0	31.5	3.71	2024-06-17	0	2024-06-24	0	32	4.3	2024-07-01	0	2024-07-10	0	32.5	4.59	2024-07-17	0	2024-07-22	0	32.5	4.84	2024-07-29	1	2024-08-06	1	32.5	4.85	2024-08-12	1	2024-08-19	1			2024-08-26	1	2024-09-03	1			2025-09-10	1
D-74-67	11	Deposit	2024-06-10	0	28	4.3	2024-06-17	0	2024-06-24	0	28	4.5	2024-07-01	0	2024-07-10	0	28	4.68	2024-07-17	0	2024-07-22	0	28	4.69	2024-07-29	0	2024-08-06	0	28	4.7	2024-08-12	0	2024-08-19	0	28	4.7	2024-08-26	1	2024-09-03	1			2025-09-10	1
D-74-68	9	Deposit	2024-06-10	0	27.5	3.9	2024-06-17	0	2024-06-24	0	27.5	4.05	2024-07-01	0	2024-07-10	0	28	4.1	2024-07-17	0	2024-07-22	0	28	4.3	2024-07-29	0	2024-08-06	0	28	4.26	2024-08-12	1	2024-08-19	1	28	4.26	2024-08-26	1	2024-09-03	1			2025-09-10	1
D-74-69	9	Deposit	2024-06-10	0	30	3.6	2024-06-17	0	2024-06-24	0	30.5	3.8	2024-07-01	0	2024-07-10	0	31	3.77	2024-07-17	0	2024-07-22	0	31	3.78	2024-07-29	0	2024-08-06	0	31	3.79	2024-08-12	1	2024-08-19	0	31	3.79	2024-08-26	1	2024-09-03	1			2025-09-10	1
D-74-70	9	Deposit	2024-06-10	0	38	4.22	2024-06-17	0	2024-06-24	0	38.5	4.5	2024-07-01	0	2024-07-10	0	38.5	4.7	2024-07-17	0	2024-07-22	0	38.5	4.7	2024-07-29	0	2024-08-06	0	38.5	4.71	2024-08-12	1	2024-08-19	1	38.5	4.71	2024-08-26	1	2024-09-03	1			2025-09-10	1
D-75-71	6	Deposit	2024-06-10	0	35	4.2	2024-06-17	0	2024-06-24	0	36	4.97	2024-07-01	0	2024-07-10	0	36.5	5.03	2024-07-17	0	2024-07-22	1	36.5	5.1	2024-07-29	1	2024-08-06	1			2024-08-12	1	2024-08-19	1			2024-08-26	1	2024-09-03	1			2025-09-10	1
D-75-72	7	Deposit	2024-06-10	0	26.5	3.8	2024-06-17	0	2024-06-24	0	27	4.3	2024-07-01	0	2024-07-10	0	27	4.4	2024-07-17	0	2024-07-22	0	27	4.405	2024-07-29	1	2024-08-06	1	27	4.4	2024-08-12	1	2024-08-19	1			2024-08-26	1	2024-09-03	1			2025-09-10	1
D-75-73	8	Deposit	2024-06-10	0	30	3.5	2024-06-17	0	2024-06-24	0	30	3.9	2024-07-01	0	2024-07-10	0	30	4.1	2024-07-17	0	2024-07-22	0	30	4.2	2024-07-29	0	2024-08-06	1	30	4.31	2024-08-12	1	2024-08-19	1	30	4.31	2024-08-26	1	2024-09-03	1			2025-09-10	1
D-75-74	8	Deposit	2024-06-10	0	31.5	3.6	2024-06-17	0	2024-06-24	0	32	3.9	2024-07-01	0	2024-07-10	0	32	4.17	2024-07-17	0	2024-07-22	0	32	4.185	2024-07-29	0	2024-08-06	1	32	4.185	2024-08-12	1	2024-08-19	1	32	4.185	2024-08-26	1	2024-09-03	1			2025-09-10	1
D-75-75	11	Deposit	2024-06-10	0	28.5	3	2024-06-17	0	2024-06-24	0	28.5	3.2	2024-07-01	0	2024-07-10	0	28.5	3.18	2024-07-17	0	2024-07-22	0	28.5	3.2	2024-07-29	0	2024-08-06	0	28.5	3.21	2024-08-12	0	2024-08-19	0	28.5	3.21	2024-08-26	1	2024-09-03	1			2025-09-10	1
D-76-76	8	Deposit	2024-06-10	0	30	5.1	2024-06-17	0	2024-06-24	0	30.5	5.22	2024-07-01	0	2024-07-10	0	31	5.27	2024-07-17	0	2024-07-22	0	31	5.29	2024-07-29	0	2024-08-06	1	31	5.29	2024-08-12	1	2024-08-19	1	31	5.29	2024-08-26	1	2024-09-03	1			2025-09-10	1
D-76-77	8	Deposit	2024-06-10	0	37	5.42	2024-06-17	0	2024-06-24	0	37	5.5	2024-07-01	0	2024-07-10	0	37	5.51	2024-07-17	0	2024-07-22	0	37	5.51	2024-07-29	0	2024-08-06	1	37	5.51	2024-08-12	1	2024-08-19	1	37	5.51	2024-08-26	1	2024-09-03	1			2025-09-10	1
D-76-78	9	Deposit	2024-06-10	0	33.5	4.1	2024-06-17	0	2024-06-24	0	34	4.3	2024-07-01	0	2024-07-10	0	34	4.4	2024-07-17	0	2024-07-22	0	34	4.49	2024-07-29	0	2024-08-06	0	34	4.49	2024-08-12	1	2024-08-19	1	34	4.49	2024-08-26	1	2024-09-03	1			2025-09-10	1
D-76-79	8	Deposit	2024-06-10	0	25	3.8	2024-06-17	0	2024-06-24	0	25	4.3	2024-07-01	0	2024-07-10	0	25	4.5	2024-07-17	0	2024-07-22	0	25	4.78	2024-07-29	0	2024-08-06	1	25	4.78	2024-08-12	1	2024-08-19	1	25	4.79	2024-08-26	1	2024-09-03	1			2025-09-10	1
D-76-80	8	Deposit	2024-06-10	0	38	4.8	2024-06-17	0	2024-06-24	0	38	5.1	2024-07-01	0	2024-07-10	0	38	5.27	2024-07-17	0	2024-07-22	0	38	5.275	2024-07-29	0	2024-08-06	1	38	5.275	2024-08-12	1	2024-08-19	1	38	5.3	2024-08-26	1	2024-09-03	1			2025-09-10	1
D-77-81	10	Deposit	2024-06-10	0	34.5	4.7	2024-06-17	0	2024-06-24	0	35	4.98	2024-07-01	0	2024-07-10	0	35.5	5.17	2024-07-17	0	2024-07-22	0	35.5	5.34	2024-07-29	0	2024-08-06	0	35.5	5.34	2024-08-12	0	2024-08-19	1	35.5	5.34	2024-08-26	1	2024-09-03	1			2025-09-10	1
D-77-82	10	Deposit	2024-06-10	0	32	4.74	2024-06-17	0	2024-06-24	0	32	4.8	2024-07-01	0	2024-07-10	0	32.5	4.9	2024-07-17	0	2024-07-22	0	32.5	4.905	2024-07-29	0	2024-08-06	0	32.5	4.905	2024-08-12	0	2024-08-19	1	32.5	4.905	2024-08-26	1	2024-09-03	1			2025-09-10	1
D-77-83	11	Deposit	2024-06-10	0	30	3.8	2024-06-17	0	2024-06-24	0	30	4.1	2024-07-01	0	2024-07-10	0	30.5	4.5	2024-07-17	0	2024-07-22	0	30.5	4.6	2024-07-29	0	2024-08-06	0	30.5	4.68	2024-08-12	0	2024-08-19	0	30.5	4.68	2024-08-26	1	2024-09-03	1			2025-09-10	1
D-77-84	11	Deposit	2024-06-10	0	22.5	4	2024-06-17	0	2024-06-24	0	23	4.16	2024-07-01	0	2024-07-10	0	23.5	4.57	2024-07-17	0	2024-07-22	0	23.5	4.58	2024-07-29	0	2024-08-06	0	23.5	4.58	2024-08-12	0	2024-08-19	0	23.5	4.58	2024-08-26	1	2024-09-03	1			2025-09-10	1
D-77-85	10	Deposit	2024-06-10	0	29	4.7	2024-06-17	0	2024-06-24	0	29	4.82	2024-07-01	0	2024-07-10	0	29.5	4.85	2024-07-17	0	2024-07-22	0	29.5	4.86	2024-07-29	0	2024-08-06	0	29.5	4.86	2024-08-12	0	2024-08-19	1	29.5	4.86	2024-08-26	1	2024-09-03	1			2025-09-10	1
D-78-86	7	Deposit	2024-06-10	0	41	5.1	2024-06-17	0	2024-06-24	0	41	5.4	2024-07-01	0	2024-07-10	0	41	5.5	2024-07-17	0	2024-07-22	0	41	5.65	2024-07-29	1	2024-08-06	1	41	5.63	2024-08-12	1	2024-08-19	1			2024-08-26	1	2024-09-03	1			2025-09-10	1
D-78-87	9	Deposit	2024-06-10	0	33.5	4.2	2024-06-17	0	2024-06-24	0	33.5	4.4	2024-07-01	0	2024-07-10	0	34	4.7	2024-07-17	0	2024-07-22	0	34	4.705	2024-07-29	0	2024-08-06	0	34	4.72	2024-08-12	1	2024-08-19	1	34	4.72	2024-08-26	1	2024-09-03	1			2025-09-10	1
D-78-88	8	Deposit	2024-06-10	0	36	4.4	2024-06-17	0	2024-06-24	0	37	4.89	2024-07-01	0	2024-07-10	0	37	5.2	2024-07-17	0	2024-07-22	0	37	5.32	2024-07-29	0	2024-08-06	1	37	5.32	2024-08-12	1	2024-08-19	1	37	5.32	2024-08-26	1	2024-09-03	1			2025-09-10	1
D-78-89	11	Deposit	2024-06-10	0	32.5	4.2	2024-06-17	0	2024-06-24	0	32.5	4.4	2024-07-01	0	2024-07-10	0	33	4.5	2024-07-17	0	2024-07-22	0	33	4.5	2024-07-29	0	2024-08-06	0	33	4.5	2024-08-12	0	2024-08-19	0	33	4.5	2024-08-26	1	2024-09-03	1			2025-09-10	1
D-78-90	9	Deposit	2024-06-10	0	38.5	4.3	2024-06-17	0	2024-06-24	0	38.5	4.4	2024-07-01	0	2024-07-10	0	39	4.4	2024-07-17	0	2024-07-22	0	39	4.4	2024-07-29	0	2024-08-06	0	39	4.44	2024-08-12	1	2024-08-19	1	39	4.44	2024-08-26	1	2024-09-03	1			2025-09-10	1
D-79-91	8	Deposit	2024-06-10	0	20.5	4.4	2024-06-17	0	2024-06-24	0	21	4.6	2024-07-01	0	2024-07-10	0	22	4.7	2024-07-17	0	2024-07-22	0	22	4.8	2024-07-29	0	2024-08-06	1	22	4.8	2024-08-12	1	2024-08-19	1			2024-08-26	1	2024-09-03	1			2025-09-10	1
D-79-92	9	Deposit	2024-06-10	0	29.5	3.4	2024-06-17	0	2024-06-24	0	29.5	3.8	2024-07-01	0	2024-07-10	0	30	3.8	2024-07-17	0	2024-07-22	0	30	3.855	2024-07-29	0	2024-08-06	0	30	3.855	2024-08-12	1	2024-08-19	1	30	3.855	2024-08-26	1	2024-09-03	1			2025-09-10	1
D-79-93	8	Deposit	2024-06-10	0	32.5	4.5	2024-06-17	0	2024-06-24	0	33	5.3	2024-07-01	0	2024-07-10	0	33.5	5.6	2024-07-17	0	2024-07-22	0	33.5	5.685	2024-07-29	0	2024-08-06	1	33.5	5.685	2024-08-12	1	2024-08-19	1	33.5	5.685	2024-08-26	1	2024-09-03	1			2025-09-10	1
D-79-94	8	Deposit	2024-06-10	0	26	4.6	2024-06-17	0	2024-06-24	0	26	5	2024-07-01	0	2024-07-10	0	26	5.2	2024-07-17	0	2024-07-22	0	26	5.2	2024-07-29	0	2024-08-06	1	26	5.26	2024-08-12	1	2024-08-19	1			2024-08-26	1	2024-09-03	1			2025-09-10	1
D-79-95	9	Deposit	2024-06-10	0	39	5	2024-06-17	0	2024-06-24	0	40	5.5	2024-07-01	0	2024-07-10	0	40	5.6	2024-07-17	0	2024-07-22	0	40	5.75	2024-07-29	0	2024-08-06	0	40	5.75	2024-08-12	1	2024-08-19	1	40	5.75	2024-08-26	1	2024-09-03	1			2025-09-10	1
D-80-96	10	Deposit	2024-06-10	0	40	4.3	2024-06-17	0	2024-06-24	0	40	4.5	2024-07-01	0	2024-07-10	0	40.5	5	2024-07-17	0	2024-07-22	0	40.5	5.29	2024-07-29	0	2024-08-06	0	40.5	5.31	2024-08-12	0	2024-08-19	1	40.5	5.31	2024-08-26	1	2024-09-03	1			2025-09-10	1
D-80-97	7	Deposit	2024-06-10	0	35	3.55	2024-06-17	0	2024-06-24	0	35	3.81	2024-07-01	0	2024-07-10	0	35	4.3	2024-07-17	0	2024-07-22	0	35	4.24	2024-07-29	1	2024-08-06	1	35	4.24	2024-08-12	1	2024-08-19	1			2024-08-26	1	2024-09-03	1			2025-09-10	1
D-80-98	9	Deposit	2024-06-10	0	37	4.9	2024-06-17	0	2024-06-24	0	37	5.3	2024-07-01	0	2024-07-10	0	37.5	5.6	2024-07-17	0	2024-07-22	0	37.5	5.735	2024-07-29	0	2024-08-06	0	37.5	5.76	2024-08-12	1	2024-08-19	1	37.5	5.76	2024-08-26	1	2024-09-03	1			2025-09-10	1
D-80-99	10	Deposit	2024-06-10	0	31	4.63	2024-06-17	0	2024-06-24	0	32	4.77	2024-07-01	0	2024-07-10	0	32	4.8	2024-07-17	0	2024-07-22	0	32	4.855	2024-07-29	0	2024-08-06	0	32	4.91	2024-08-12	0	2024-08-19	1	32	4.91	2024-08-26	1	2024-09-03	1			2025-09-10	1
M-81-01	8	Mixed	2024-06-10	0	25.5	4.52	2024-06-17	0	2024-06-24	0	26	4.99	2024-07-01	0	2024-07-10	0	26	5.1	2024-07-17	0	2024-07-22	0	26	5.2	2024-07-29	0	2024-08-06	1	26	5.275	2024-08-12	1	2024-08-19	1	26	5.275	2024-08-26	1	2024-09-03	1			2025-09-10	1
M-81-02	8	Mixed	2024-06-10	0	28	4.2	2024-06-17	0	2024-06-24	0	28	4.5	2024-07-01	0	2024-07-10	0	28	4.7	2024-07-17	0	2024-07-22	0	28	4.795	2024-07-29	0	2024-08-06	1	28	4.82	2024-08-12	1	2024-08-19	1	26.5	4.82	2024-08-26	1	2024-09-03	1			2025-09-10	1
M-81-03	11	Mixed	2024-06-10	0	27	4.78	2024-06-17	0	2024-06-24	0	27.5	5.4	2024-07-01	0	2024-07-10	0	27.5	5.59	2024-07-17	0	2024-07-22	0	27.5	5.56	2024-07-29	0	2024-08-06	0	27.5	5.6	2024-08-12	0	2024-08-19	0	27.5	5.6	2024-08-26	1	2024-09-03	1			2025-09-10	1
M-81-04	12	Mixed	2024-06-10	0	27	4	2024-06-17	0	2024-06-24	0	27.5	4.2	2024-07-01	0	2024-07-10	0	28	4.4	2024-07-17	0	2024-07-22	0	28	4.49	2024-07-29	0	2024-08-06	0	28	4.49	2024-08-12	0	2024-08-19	0	28	4.49	2024-08-26	0	2024-09-03	0	28	4.49	2025-09-10	1
M-81-05	9	Mixed	2024-06-10	0	34	4.82	2024-06-17	0	2024-06-24	0	35	5.3	2024-07-01	0	2024-07-10	0	35	5.53	2024-07-17	0	2024-07-22	0	35	5.55	2024-07-29	0	2024-08-06	0	35	5.55	2024-08-12	1	2024-08-19	1	35	5.55	2024-08-26	1	2024-09-03	1			2025-09-10	1
M-82-06	8	Mixed	2024-06-10	0	34	3.9	2024-06-17	0	2024-06-24	0	34	4.4	2024-07-01	0	2024-07-10	0	34.5	4.53	2024-07-17	0	2024-07-22	0	34.5	4.57	2024-07-29	0	2024-08-06	1	34.5	4.57	2024-08-12	1	2024-08-19	1	34.5	4.57	2024-08-26	1	2024-09-03	1			2025-09-10	1
M-82-07	9	Mixed	2024-06-10	0	37	4.75	2024-06-17	0	2024-06-24	0	37	5.19	2024-07-01	0	2024-07-10	0	37.5	5.5	2024-07-17	0	2024-07-22	0	37.5	5.79	2024-07-29	0	2024-08-06	0	37.5	5.77	2024-08-12	1	2024-08-19	1	37.5	5.77	2024-08-26	1	2024-09-03	1			2025-09-10	1
M-82-08	9	Mixed	2024-06-10	0	31	4.7	2024-06-17	0	2024-06-24	0	31	5	2024-07-01	0	2024-07-10	0	31.5	4.99	2024-07-17	0	2024-07-22	0	31.5	4.98	2024-07-29	0	2024-08-06	0	31.5	4.97	2024-08-12	1	2024-08-19	1	31.5	4.97	2024-08-26	1	2024-09-03	1			2025-09-10	1
M-82-09	10	Mixed	2024-06-10	0	28	3.6	2024-06-17	0	2024-06-24	0	28.5	3.75	2024-07-01	0	2024-07-10	0	29	3.9	2024-07-17	0	2024-07-22	0	29	3.935	2024-07-29	0	2024-08-06	0	29	3.97	2024-08-12	0	2024-08-19	1	29	3.97	2024-08-26	1	2024-09-03	1			2025-09-10	1
M-82-10	8	Mixed	2024-06-10	0	21	3	2024-06-17	0	2024-06-24	0	22	3.5	2024-07-01	0	2024-07-10	0	22.5	4	2024-07-17	0	2024-07-22	0	22.5	4.13	2024-07-29	0	2024-08-06	1	22.5	4.14	2024-08-12	1	2024-08-19	1	22.5	4.12	2024-08-26	1	2024-09-03	1			2025-09-10	1
M-83-11	9	Mixed	2024-06-10	0	32	4.5	2024-06-17	0	2024-06-24	0	32	4.6	2024-07-01	0	2024-07-10	0	32	4.78	2024-07-17	0	2024-07-22	0	32	4.88	2024-07-29	0	2024-08-06	0	32	4.88	2024-08-12	1	2024-08-19	1	32	4.88	2024-08-26	1	2024-09-03	1			2025-09-10	1
M-83-12	7	Mixed	2024-06-10	0	37	6.33	2024-06-17	0	2024-06-24	0	38	7.12	2024-07-01	0	2024-07-10	0	38.5	7.18	2024-07-17	0	2024-07-22	0	38.5	7.09	2024-07-29	1	2024-08-06	1	38.5	7.06	2024-08-12	1	2024-08-19	1			2024-08-26	1	2024-09-03	1			2025-09-10	1
M-83-13	12	Mixed	2024-06-10	0	29.5	3.8	2024-06-17	0	2024-06-24	0	29.5	4.3	2024-07-01	0	2024-07-10	0	30	4.5	2024-07-17	0	2024-07-22	0	30	4.425	2024-07-29	0	2024-08-06	0	30	4.425	2024-08-12	0	2024-08-19	0	30	4.425	2024-08-26	0	2024-09-03	0	30	4.43	2025-09-10	1
M-83-14	10	Mixed	2024-06-10	0	26	4.4	2024-06-17	0	2024-06-24	0	26	4.6	2024-07-01	0	2024-07-10	0	26	4.7	2024-07-17	0	2024-07-22	0	26	4.765	2024-07-29	0	2024-08-06	0	26	4.765	2024-08-12	0	2024-08-19	1	26	4.765	2024-08-26	1	2024-09-03	1			2025-09-10	1
M-83-15	10	Mixed	2024-06-10	0	27	5.1	2024-06-17	0	2024-06-24	0	27	5.07	2024-07-01	0	2024-07-10	0	27	5.2	2024-07-17	0	2024-07-22	0	26.5	5.285	2024-07-29	0	2024-08-06	0	26.5	5.285	2024-08-12	0	2024-08-19	1	26.5	5.285	2024-08-26	1	2024-09-03	1			2025-09-10	1
M-84-16	8	Mixed	2024-06-10	0	31	5.2	2024-06-17	0	2024-06-24	0	31	5.2	2024-07-01	0	2024-07-10	0	31	5.2	2024-07-17	0	2024-07-22	0	31	5.18	2024-07-29	0	2024-08-06	1	31	5.18	2024-08-12	1	2024-08-19	1	31	5.18	2024-08-26	1	2024-09-03	1			2025-09-10	1
M-84-17	9	Mixed	2024-06-10	0	33.5	4.2	2024-06-17	0	2024-06-24	0	34	4.3	2024-07-01	0	2024-07-10	0	34.5	4.39	2024-07-17	0	2024-07-22	0	34.5	4.43	2024-07-29	0	2024-08-06	0	34.5	4.43	2024-08-12	1	2024-08-19	1	34.5	4.43	2024-08-26	1	2024-09-03	1			2025-09-10	1
M-84-18	10	Mixed	2024-06-10	0	27	3.3	2024-06-17	0	2024-06-24	0	27	3.7	2024-07-01	0	2024-07-10	0	27	4	2024-07-17	0	2024-07-22	0	27	4.14	2024-07-29	0	2024-08-06	0	27	4.14	2024-08-12	0	2024-08-19	1	27	4.14	2024-08-26	1	2024-09-03	1			2025-09-10	1
M-84-19	10	Mixed	2024-06-10	0	30	4.2	2024-06-17	0	2024-06-24	0	30	4.5	2024-07-01	0	2024-07-10	0	30	4.8	2024-07-17	0	2024-07-22	0	30	4.84	2024-07-29	0	2024-08-06	0	30	4.84	2024-08-12	0	2024-08-19	1	30	4.84	2024-08-26	1	2024-09-03	1			2025-09-10	1
M-84-20	11	Mixed	2024-06-10	0	31	3.5	2024-06-17	0	2024-06-24	0	31	3.62	2024-07-01	0	2024-07-10	0	31	3.62	2024-07-17	0	2024-07-22	0	31	3.68	2024-07-29	0	2024-08-06	0	31	3.7	2024-08-12	0	2024-08-19	0	31	3.7	2024-08-26	1	2024-09-03	1			2025-09-10	1
M-85-21	10	Mixed	2024-06-10	0	29	3.8	2024-06-17	0	2024-06-24	0	29	4.1	2024-07-01	0	2024-07-10	0	29.5	4.3	2024-07-17	0	2024-07-22	0	29.5	4.28	2024-07-29	0	2024-08-06	0	29.5	4.28	2024-08-12	0	2024-08-19	1	29.5	4.28	2024-08-26	1	2024-09-03	1			2025-09-10	1
M-85-22	7	Mixed	2024-06-10	0	27.5	4	2024-06-17	0	2024-06-24	0	27.5	4.3	2024-07-01	0	2024-07-10	0	27.5	4.4	2024-07-17	0	2024-07-22	0	27.5	4.61	2024-07-29	1	2024-08-06	1	27.5	4.62	2024-08-12	1	2024-08-19	1			2024-08-26	1	2024-09-03	1			2025-09-10	1
M-85-23	10	Mixed	2024-06-10	0	33.5	3.9	2024-06-17	0	2024-06-24	0	33.5	4	2024-07-01	0	2024-07-10	0	33.5	4.2	2024-07-17	0	2024-07-22	0	33.5	4.5	2024-07-29	0	2024-08-06	0	33.5	4.61	2024-08-12	0	2024-08-19	1	33.5	4.61	2024-08-26	1	2024-09-03	1			2025-09-10	1
M-85-24	10	Mixed	2024-06-10	0	33.5	4.31	2024-06-17	0	2024-06-24	0	33.5	4.5	2024-07-01	0	2024-07-10	0	33.5	4.5	2024-07-17	0	2024-07-22	0	33.5	4.51	2024-07-29	0	2024-08-06	0	33.5	4.51	2024-08-12	0	2024-08-19	1	33.5	4.51	2024-08-26	1	2024-09-03	1			2025-09-10	1
M-85-25	8	Mixed	2024-06-10	0	36	4.62	2024-06-17	0	2024-06-24	0	36	5	2024-07-01	0	2024-07-10	0	36	5.1	2024-07-17	0	2024-07-22	0	36	5.135	2024-07-29	0	2024-08-06	1	36	5.135	2024-08-12	1	2024-08-19	1	36	5.135	2024-08-26	1	2024-09-03	1			2025-09-10	1
M-86-26	11	Mixed	2024-06-10	0	26.5	3.97	2024-06-17	0	2024-06-24	0	26.5	4.2	2024-07-01	0	2024-07-10	0	26.5	4.32	2024-07-17	0	2024-07-22	0	26.5	4.27	2024-07-29	0	2024-08-06	0	26.5	4.27	2024-08-12	0	2024-08-19	0	26.5	4.27	2024-08-26	1	2024-09-03	1			2025-09-10	1
M-86-27	11	Mixed	2024-06-10	0	28.5	4.24	2024-06-17	0	2024-06-24	0	29	4.6	2024-07-01	0	2024-07-10	0	29	4.65	2024-07-17	0	2024-07-22	0	29	4.72	2024-07-29	0	2024-08-06	0	29	4.78	2024-08-12	0	2024-08-19	0	29	4.78	2024-08-26	1	2024-09-03	1			2025-09-10	1
M-86-28	9	Mixed	2024-06-10	0	29	3.51	2024-06-17	0	2024-06-24	0	28.5	3.9	2024-07-01	0	2024-07-10	0	29	4.2	2024-07-17	0	2024-07-22	0	29	4.2	2024-07-29	0	2024-08-06	0	29	4.2	2024-08-12	1	2024-08-19	1	29	4.2	2024-08-26	1	2024-09-03	1			2025-09-10	1
M-86-29	9	Mixed	2024-06-10	0	25	4.34	2024-06-17	0	2024-06-24	0	25	4.4	2024-07-01	0	2024-07-10	0	25.5	4.4	2024-07-17	0	2024-07-22	0	25.5	4.355	2024-07-29	0	2024-08-06	0	25.5	4.355	2024-08-12	1	2024-08-19	1	25.5	4.355	2024-08-26	1	2024-09-03	1			2025-09-10	1
M-86-30	9	Mixed	2024-06-10	0	25.5	3.3	2024-06-17	0	2024-06-24	0	27	4.17	2024-07-01	0	2024-07-10	0	27.5	4.52	2024-07-17	0	2024-07-22	0	27.5	4.79	2024-07-29	0	2024-08-06	0	27.5	4.79	2024-08-12	1	2024-08-19	1	27.5	4.79	2024-08-26	1	2024-09-03	1			2025-09-10	1
M-86-96	12	Mixed	2024-06-10	0	28.5	3.9	2024-06-17	0	2024-06-24	0	30	4.3	2024-07-01	0	2024-07-10	0	30.5	4.52	2024-07-17	0	2024-07-22	0	30.5	4.52	2024-07-29	0	2024-08-06	0	30.5	4.52	2024-08-12	0	2024-08-19	0	30.5	4.52	2024-08-26	0	2024-09-03	1			2025-09-10	1
M-87-31	10	Mixed	2024-06-10	0	29	4.49	2024-06-17	0	2024-06-24	0	29.5	4.55	2024-07-01	0	2024-07-10	0	29.5	4.6	2024-07-17	0	2024-07-22	0	29.5	4.61	2024-07-29	0	2024-08-06	0	29.5	4.61	2024-08-12	0	2024-08-19	1	29.5	4.61	2024-08-26	1	2024-09-03	1			2025-09-10	1
M-87-32	11	Mixed	2024-06-10	0	27	4.2	2024-06-17	0	2024-06-24	0	27.5	4.44	2024-07-01	0	2024-07-10	0	27.5	4.5	2024-07-17	0	2024-07-22	0	27.5	4.6	2024-07-29	0	2024-08-06	0	27.5	4.79	2024-08-12	0	2024-08-19	0	27.5	4.8	2024-08-26	1	2024-09-03	1			2025-09-10	1
M-87-33	10	Mixed	2024-06-10	0	26	3.9	2024-06-17	0	2024-06-24	0	26.5	4	2024-07-01	0	2024-07-10	0	26.5	4.21	2024-07-17	0	2024-07-22	0	26.5	4.25	2024-07-29	0	2024-08-06	0	26.5	4.32	2024-08-12	0	2024-08-19	1	26.5	4.32	2024-08-26	1	2024-09-03	1			2025-09-10	1
M-87-34	10	Mixed	2024-06-10	0	19	4.1	2024-06-17	0	2024-06-24	0	19	4.5	2024-07-01	0	2024-07-10	0	19	4.6	2024-07-17	0	2024-07-22	0	19	4.695	2024-07-29	0	2024-08-06	0	19	4.69	2024-08-12	0	2024-08-19	1	19	4.69	2024-08-26	1	2024-09-03	1			2025-09-10	1
M-87-35	12	Mixed	2024-06-10	0	30	4.57	2024-06-17	0	2024-06-24	0	30	4.7	2024-07-01	0	2024-07-10	0	30	4.8	2024-07-17	0	2024-07-22	0	30	4.8	2024-07-29	0	2024-08-06	0	30	4.81	2024-08-12	0	2024-08-19	0	30	4.81	2024-08-26	0	2024-09-03	0	30	4.81	2025-09-10	1
M-88-36	8	Mixed	2024-06-10	0	23	4.7	2024-06-17	0	2024-06-24	0	23.5	4.7	2024-07-01	0	2024-07-10	0	24	4.8	2024-07-17	0	2024-07-22	0	24	4.8	2024-07-29	0	2024-08-06	1	24	4.81	2024-08-12	1	2024-08-19	1	24	4.81	2024-08-26	1	2024-09-03	1			2025-09-10	1
M-88-37	8	Mixed	2024-06-10	0	30	4.3	2024-06-17	0	2024-06-24	0	30	4.61	2024-07-01	0	2024-07-10	0	30.5	4.75	2024-07-17	0	2024-07-22	0	30.5	4.765	2024-07-29	0	2024-08-06	1	30.5	4.765	2024-08-12	1	2024-08-19	1	30.5	4.765	2024-08-26	1	2024-09-03	1			2025-09-10	1
M-88-38	12	Mixed	2024-06-10	0	24	4.69	2024-06-17	0	2024-06-24	0	24	4.7	2024-07-01	0	2024-07-10	0	24	4.72	2024-07-17	0	2024-07-22	0	24	4.715	2024-07-29	0	2024-08-06	0	24	4.715	2024-08-12	0	2024-08-19	0	24	4.715	2024-08-26	0	2024-09-03	0	24	4.72	2025-09-10	1
M-88-39	8	Mixed	2024-06-10	0	27.5	2.76	2024-06-17	0	2024-06-24	0	27.5	3.01	2024-07-01	0	2024-07-10	0	28	3.31	2024-07-17	0	2024-07-22	0	29	3.58	2024-07-29	0	2024-08-06	1	29	3.59	2024-08-12	1	2024-08-19	1	29	3.59	2024-08-26	1	2024-09-03	1			2025-09-10	1
M-88-40	12	Mixed	2024-06-10	0	27	4.02	2024-06-17	0	2024-06-24	0	27	4.14	2024-07-01	0	2024-07-10	0	27	4.15	2024-07-17	0	2024-07-22	0	27	4.16	2024-07-29	0	2024-08-06	0	27	4.16	2024-08-12	0	2024-08-19	0	27	4.16	2024-08-26	0	2024-09-03	0	27	4.16	2025-09-10	1
M-89-41	11	Mixed	2024-06-10	0	27	4.6	2024-06-17	0	2024-06-24	0	27	4.75	2024-07-01	0	2024-07-10	0	27	4.76	2024-07-17	0	2024-07-22	0	27	4.77	2024-07-29	0	2024-08-06	0	27	4.79	2024-08-12	0	2024-08-19	0	27	4.79	2024-08-26	1	2024-09-03	1			2025-09-10	1
M-89-42	11	Mixed	2024-06-10	0	30.5	4.4	2024-06-17	0	2024-06-24	0	31	4.5	2024-07-01	0	2024-07-10	0	31	4.6	2024-07-17	0	2024-07-22	0	31	4.9	2024-07-29	0	2024-08-06	0	31	4.91	2024-08-12	0	2024-08-19	0	31	4.91	2024-08-26	1	2024-09-03	1			2025-09-10	1
M-89-43	10	Mixed	2024-06-10	0	33	4.36	2024-06-17	0	2024-06-24	0	33	4.5	2024-07-01	0	2024-07-10	0	33	4.57	2024-07-17	0	2024-07-22	0	33	4.835	2024-07-29	0	2024-08-06	0	33	4.835	2024-08-12	0	2024-08-19	1	33	4.835	2024-08-26	1	2024-09-03	1			2025-09-10	1
M-89-44	12	Mixed	2024-06-10	0	25	5.04	2024-06-17	0	2024-06-24	0	25.5	5.1	2024-07-01	0	2024-07-10	0	26	5.12	2024-07-17	0	2024-07-22	0	26	5.12	2024-07-29	0	2024-08-06	0	26	5.12	2024-08-12	0	2024-08-19	0	26	5.12	2024-08-26	0	2024-09-03	0	26	5.12	2025-09-10	1
M-89-45	10	Mixed	2024-06-10	0	27.5	5.2	2024-06-17	0	2024-06-24	0	28	5.5	2024-07-01	0	2024-07-10	0	28	5.5	2024-07-17	0	2024-07-22	0	28	5.54	2024-07-29	0	2024-08-06	0	28	5.54	2024-08-12	0	2024-08-19	1	28	5.54	2024-08-26	1	2024-09-03	1			2025-09-10	1
M-90-46	10	Mixed	2024-06-10	0	33	5.15	2024-06-17	0	2024-06-24	0	34	5.2	2024-07-01	0	2024-07-10	0	33.5	5.2	2024-07-17	0	2024-07-22	0	33.5	5.15	2024-07-29	0	2024-08-06	0	33.5	5.17	2024-08-12	0	2024-08-19	1	33.5	5.17	2024-08-26	1	2024-09-03	1			2025-09-10	1
M-90-47	8	Mixed	2024-06-10	0	23	4.7	2024-06-17	0	2024-06-24	0	23.5	4.8	2024-07-01	0	2024-07-10	0	23.5	4.78	2024-07-17	0	2024-07-22	0	23.5	5	2024-07-29	0	2024-08-06	1	23.5	5	2024-08-12	1	2024-08-19	1	23.5	5.01	2024-08-26	1	2024-09-03	1			2025-09-10	1
M-90-48	9	Mixed	2024-06-10	0	33	4.9	2024-06-17	0	2024-06-24	0	33	4.92	2024-07-01	0	2024-07-10	0	33.5	5.12	2024-07-17	0	2024-07-22	0	33.5	5.655	2024-07-29	0	2024-08-06	0	33.5	5.655	2024-08-12	1	2024-08-19	1	33.5	5.67	2024-08-26	1	2024-09-03	1			2025-09-10	1
M-90-49	8	Mixed	2024-06-10	0	34	5.48	2024-06-17	0	2024-06-24	0	34	5.58	2024-07-01	0	2024-07-10	0	34	5.61	2024-07-17	0	2024-07-22	0	34	5.695	2024-07-29	0	2024-08-06	1	34	5.695	2024-08-12	1	2024-08-19	1	34	5.695	2024-08-26	1	2024-09-03	1			2025-09-10	1
M-90-50	10	Mixed	2024-06-10	0	24	3.87	2024-06-17	0	2024-06-24	0	24	4.46	2024-07-01	0	2024-07-10	0	24.5	4.5	2024-07-17	0	2024-07-22	0	24.5	4.52	2024-07-29	0	2024-08-06	0	24	4.52	2024-08-12	0	2024-08-19	1	24	4.52	2024-08-26	1	2024-09-03	1			2025-09-10	1
M-91-51	8	Mixed	2024-06-10	0	33	5.5	2024-06-17	0	2024-06-24	0	33.5	5.72	2024-07-01	0	2024-07-10	0	34	5.77	2024-07-17	0	2024-07-22	0	34	5.77	2024-07-29	0	2024-08-06	1	34	5.77	2024-08-12	1	2024-08-19	1	34	5.78	2024-08-26	1	2024-09-03	1			2025-09-10	1
M-91-52	10	Mixed	2024-06-10	0	31	4.58	2024-06-17	0	2024-06-24	0	32	5.21	2024-07-01	0	2024-07-10	0	32.5	5.32	2024-07-17	0	2024-07-22	0	32.5	5.71	2024-07-29	0	2024-08-06	0	32.5	5.71	2024-08-12	0	2024-08-19	1	32.5	5.71	2024-08-26	1	2024-09-03	1			2025-09-10	1
M-91-53	11	Mixed	2024-06-10	0	34	4.2	2024-06-17	0	2024-06-24	0	34	4.29	2024-07-01	0	2024-07-10	0	35	4.35	2024-07-17	0	2024-07-22	0	35	4.375	2024-07-29	0	2024-08-06	0	35	4.375	2024-08-12	0	2024-08-19	0	35	4.375	2024-08-26	1	2024-09-03	1			2025-09-10	1
M-91-54	12	Mixed	2024-06-10	0	32	4.4	2024-06-17	0	2024-06-24	0	32	4.37	2024-07-01	0	2024-07-10	0	32	4.47	2024-07-17	0	2024-07-22	0	32	4.61	2024-07-29	0	2024-08-06	0	32	4.62	2024-08-12	0	2024-08-19	0	32	4.62	2024-08-26	0	2024-09-03	0	32	4.62	2025-09-10	1
M-91-55	10	Mixed	2024-06-10	0	30	4.96	2024-06-17	0	2024-06-24	0	30.5	5.23	2024-07-01	0	2024-07-10	0	31	5.27	2024-07-17	0	2024-07-22	0	31	5.25	2024-07-29	0	2024-08-06	0	31	5.26	2024-08-12	0	2024-08-19	1	31	5.25	2024-08-26	1	2024-09-03	1			2025-09-10	1
M-92-56	12	Mixed	2024-06-10	0	28	3.3	2024-06-17	0	2024-06-24	0	28	3.65	2024-07-01	0	2024-07-10	0	28	3.7	2024-07-17	0	2024-07-22	0	28	3.82	2024-07-29	0	2024-08-06	0	28	3.82	2024-08-12	0	2024-08-19	0	28	3.82	2024-08-26	0	2024-09-03	0	28	3.82	2025-09-10	1
M-92-57	8	Mixed	2024-06-10	0	24	4.23	2024-06-17	0	2024-06-24	0	24.5	4.3	2024-07-01	0	2024-07-10	0	24.5	4.3	2024-07-17	0	2024-07-22	0	24.5	4.41	2024-07-29	0	2024-08-06	1	24.5	4.42	2024-08-12	1	2024-08-19	1	24.5	4.42	2024-08-26	1	2024-09-03	1			2025-09-10	1
M-92-58	12	Mixed	2024-06-10	0	30	3.5	2024-06-17	0	2024-06-24	0	30.5	3.6	2024-07-01	0	2024-07-10	0	31	3.84	2024-07-17	0	2024-07-22	0	31	4.095	2024-07-29	0	2024-08-06	0	31	4.12	2024-08-12	0	2024-08-19	0	31	4.12	2024-08-26	0	2024-09-03	1			2025-09-10	1
M-92-59	11	Mixed	2024-06-10	0	31	4.46	2024-06-17	0	2024-06-24	0	31.5	4.68	2024-07-01	0	2024-07-10	0	32	4.7	2024-07-17	0	2024-07-22	0	32	4.72	2024-07-29	0	2024-08-06	0	32	4.72	2024-08-12	0	2024-08-19	0	32	4.73	2024-08-26	1	2024-09-03	1			2025-09-10	1
M-92-60	12	Mixed	2024-06-10	0	29	4.26	2024-06-17	0	2024-06-24	0	29	4.62	2024-07-01	0	2024-07-10	0	29	4.69	2024-07-17	0	2024-07-22	0	29	4.75	2024-07-29	0	2024-08-06	0	29	4.76	2024-08-12	0	2024-08-19	0	29	4.79	2024-08-26	0	2024-09-03	0	29	4.84	2025-09-10	1
M-93-61	8	Mixed	2024-06-10	0	34	4.05	2024-06-17	0	2024-06-24	0	35	4.4	2024-07-01	0	2024-07-10	0	35	4.5	2024-07-17	0	2024-07-22	0	35	4.525	2024-07-29	0	2024-08-06	1	35	4.525	2024-08-12	1	2024-08-19	1	35	4.525	2024-08-26	1	2024-09-03	1			2025-09-10	1
M-93-62	8	Mixed	2024-06-10	0	33	5.1	2024-06-17	0	2024-06-24	0	33	5.18	2024-07-01	0	2024-07-10	0	34	5.16	2024-07-17	0	2024-07-22	0	33	5.215	2024-07-29	0	2024-08-06	1	33	5.215	2024-08-12	1	2024-08-19	1	33	5.215	2024-08-26	1	2024-09-03	1			2025-09-10	1
M-93-63	10	Mixed	2024-06-10	0	29	4.81	2024-06-17	0	2024-06-24	0	30	4.8	2024-07-01	0	2024-07-10	0	29	4.9	2024-07-17	0	2024-07-22	0	29	4.905	2024-07-29	0	2024-08-06	0	29	4.905	2024-08-12	0	2024-08-19	1	29	4.905	2024-08-26	1	2024-09-03	1			2025-09-10	1
M-93-64	11	Mixed	2024-06-10	0	24.5	4.09	2024-06-17	0	2024-06-24	0	25	4.4	2024-07-01	0	2024-07-10	0	25	4.38	2024-07-17	0	2024-07-22	0	25	4.39	2024-07-29	0	2024-08-06	0	25	4.38	2024-08-12	0	2024-08-19	0	25	4.37	2024-08-26	1	2024-09-03	1			2025-09-10	1
M-93-65	11	Mixed	2024-06-10	0	26	4.58	2024-06-17	0	2024-06-24	0	27	4.6	2024-07-01	0	2024-07-10	0	27.5	4.61	2024-07-17	0	2024-07-22	0	27.5	4.61	2024-07-29	0	2024-08-06	0	27.5	4.61	2024-08-12	0	2024-08-19	0	27.5	4.61	2024-08-26	1	2024-09-03	1			2025-09-10	1
M-94-66	12	Mixed	2024-06-10	0	36.5	4.3	2024-06-17	0	2024-06-24	0	36.5	4.4	2024-07-01	0	2024-07-10	0	37	4.6	2024-07-17	0	2024-07-22	0	37	4.645	2024-07-29	0	2024-08-06	0	37	4.64	2024-08-12	0	2024-08-19	0	37	4.64	2024-08-26	0	2024-09-03	1			2025-09-10	1
M-94-67	12	Mixed	2024-06-10	0	30.5	3.8	2024-06-17	0	2024-06-24	0	31	3.82	2024-07-01	0	2024-07-10	0	30.5	4.01	2024-07-17	0	2024-07-22	0	30.5	4.01	2024-07-29	0	2024-08-06	0	30.5	4.03	2024-08-12	0	2024-08-19	0	30.5	4.03	2024-08-26	0	2024-09-03	1			2025-09-10	1
M-94-68	9	Mixed	2024-06-10	0	33	5	2024-06-17	0	2024-06-24	0	33.5	5.06	2024-07-01	0	2024-07-10	0	34	5.1	2024-07-17	0	2024-07-22	0	34	5.285	2024-07-29	0	2024-08-06	0	34	5.14	2024-08-12	1	2024-08-19	1	34	5.14	2024-08-26	1	2024-09-03	1			2025-09-10	1
M-94-69	12	Mixed	2024-06-10	0	26	4.98	2024-06-17	0	2024-06-24	0	26	5.09	2024-07-01	0	2024-07-10	0	26.5	5.12	2024-07-17	0	2024-07-22	0	26.5	5.18	2024-07-29	0	2024-08-06	0	26.5	5.17	2024-08-12	0	2024-08-19	0	26.5	5.17	2024-08-26	0	2024-09-03	1			2025-09-10	1
M-94-70	12	Mixed	2024-06-10	0	30.5	4	2024-06-17	0	2024-06-24	0	30.5	4.4	2024-07-01	0	2024-07-10	0	31	4.44	2024-07-17	0	2024-07-22	0	31	4.465	2024-07-29	0	2024-08-06	0	31	4.48	2024-08-12	0	2024-08-19	0	31	4.48	2024-08-26	0	2024-09-03	1			2025-09-10	1
M-95-71	12	Mixed	2024-06-10	0	41.5	5.42	2024-06-17	0	2024-06-24	0	42	5.6	2024-07-01	0	2024-07-10	0	42	5.92	2024-07-17	0	2024-07-22	0	42.5	5.92	2024-07-29	0	2024-08-06	0	42.5	5.92	2024-08-12	0	2024-08-19	0	42.5	5.92	2024-08-26	0	2024-09-03	1			2025-09-10	1
M-95-72	9	Mixed	2024-06-10	0	34	4.81	2024-06-17	0	2024-06-24	0	34.5	4.82	2024-07-01	0	2024-07-10	0	34.5	4.81	2024-07-17	0	2024-07-22	0	38	4.83	2024-07-29	0	2024-08-06	0	38	4.83	2024-08-12	1	2024-08-19	1	38	4.83	2024-08-26	1	2024-09-03	1			2025-09-10	1
M-95-73	9	Mixed	2024-06-10	0	37	4.66	2024-06-17	0	2024-06-24	0	37	4.85	2024-07-01	0	2024-07-10	0	37	5.2	2024-07-17	0	2024-07-22	0	36.5	5.205	2024-07-29	0	2024-08-06	0	36.5	5.205	2024-08-12	1	2024-08-19	1	36.5	5.205	2024-08-26	1	2024-09-03	1			2025-09-10	1
M-95-74	1	Mixed	2024-06-10	0	34.5	5.34	2024-06-17	1	2024-06-24	1	35	5.38	2024-07-01	1	2024-07-10	1				1		1			2024-07-29	1	2024-08-06	1			2024-08-12	1	2024-08-19	1			2024-08-26	1	2024-09-03	1			2025-09-10	1
M-95-75	12	Mixed	2024-06-10	0	29	4.45	2024-06-17	0	2024-06-24	0	29	4.89	2024-07-01	0	2024-07-10	0	29.5	4.89	2024-07-17	0	2024-07-22	0	29.5	4.91	2024-07-29	0	2024-08-06	0	29.5	5.01	2024-08-12	0	2024-08-19	0	29.5	5.01	2024-08-26	0	2024-09-03	1			2025-09-10	1
M-96-76	11	Mixed	2024-06-10	0	19	4.1	2024-06-17	0	2024-06-24	0	20	4.6	2024-07-01	0	2024-07-10	0	21	4.78	2024-07-17	0	2024-07-22	0	21	4.88	2024-07-29	0	2024-08-06	0	21	4.88	2024-08-12	0	2024-08-19	0	21	4.88	2024-08-26	1	2024-09-03	1			2025-09-10	1
M-96-77	10	Mixed	2024-06-10	0	20	4.03	2024-06-17	0	2024-06-24	0	21.5	4.1	2024-07-01	0	2024-07-10	0	22	4.05	2024-07-17	0	2024-07-22	0	22	4.06	2024-07-29	0	2024-08-06	0	22	4.09	2024-08-12	0	2024-08-19	1	22	4.09	2024-08-26	1	2024-09-03	1			2025-09-10	1
M-96-78	10	Mixed	2024-06-10	0	30	4.69	2024-06-17	0	2024-06-24	0	30	4.7	2024-07-01	0	2024-07-10	0	30.5	4.72	2024-07-17	0	2024-07-22	0	30.5	5.76	2024-07-29	0	2024-08-06	0	30.5	4.77	2024-08-12	0	2024-08-19	1	30.5	4.77	2024-08-26	1	2024-09-03	1			2025-09-10	1
M-96-79	11	Mixed	2024-06-10	0	29	4.33	2024-06-17	0	2024-06-24	0	29	4.3	2024-07-01	0	2024-07-10	0	29	4.4	2024-07-17	0	2024-07-22	0	29	4.46	2024-07-29	0	2024-08-06	0	29	4.46	2024-08-12	0	2024-08-19	0	29	4.46	2024-08-26	1	2024-09-03	1			2025-09-10	1
M-96-80	12	Mixed	2024-06-10	0	22	4.02	2024-06-17	0	2024-06-24	0	22	4.1	2024-07-01	0	2024-07-10	0	22.5	4.14	2024-07-17	0	2024-07-22	0	22.5	4.185	2024-07-29	0	2024-08-06	0	22.5	4.185	2024-08-12	0	2024-08-19	0	22.5	4.185	2024-08-26	0	2024-09-03	1			2025-09-10	1
M-97-81	8	Mixed	2024-06-10	0	31	3.4	2024-06-17	0	2024-06-24	0	31.5	3.5	2024-07-01	0	2024-07-10	0	31.5	3.8	2024-07-17	0	2024-07-22	0	31.5	3.82	2024-07-29	0	2024-08-06	1	31.5	3.82	2024-08-12	1	2024-08-19	1	31.5	3.84	2024-08-26	1	2024-09-03	1			2025-09-10	1
M-97-82	9	Mixed	2024-06-10	0	36	5	2024-06-17	0	2024-06-24	0	36	5.2	2024-07-01	0	2024-07-10	0	36	5.2	2024-07-17	0	2024-07-22	0	36	5.225	2024-07-29	0	2024-08-06	0	36	5.225	2024-08-12	1	2024-08-19	1	36	5.225	2024-08-26	1	2024-09-03	1			2025-09-10	1
M-97-83	11	Mixed	2024-06-10	0	30	4.52	2024-06-17	0	2024-06-24	0	30	5.11	2024-07-01	0	2024-07-10	0	30	5.13	2024-07-17	0	2024-07-22	0	30	5.14	2024-07-29	0	2024-08-06	0	30	5.14	2024-08-12	0	2024-08-19	0	30	5.14	2024-08-26	1	2024-09-03	1			2025-09-10	1
M-97-84	8	Mixed	2024-06-10	0	27.5	4.92	2024-06-17	0	2024-06-24	0	28	4.93	2024-07-01	0	2024-07-10	0	28	5	2024-07-17	0	2024-07-22	0	28.5	5.02	2024-07-29	0	2024-08-06	1	28.5	5.02	2024-08-12	1	2024-08-19	1	28.5	5.04	2024-08-26	1	2024-09-03	1			2025-09-10	1
M-97-85	12	Mixed	2024-06-10	0	36	4.4	2024-06-17	0	2024-06-24	0	36	4.81	2024-07-01	0	2024-07-10	0	36	4.85	2024-07-17	0	2024-07-22	0	35.5	4.865	2024-07-29	0	2024-08-06	0	35.5	4.865	2024-08-12	0	2024-08-19	0	35.5	4.865	2024-08-26	0	2024-09-03	1			2025-09-10	1
M-98-86	10	Mixed	2024-06-10	0	36.5	5	2024-06-17	0	2024-06-24	0	36.5	5.2	2024-07-01	0	2024-07-10	0	37	5.21	2024-07-17	0	2024-07-22	0	37	5.21	2024-07-29	0	2024-08-06	0	37	5.23	2024-08-12	0	2024-08-19	1	37	5.22	2024-08-26	1	2024-09-03	1			2025-09-10	1
M-98-87	11	Mixed	2024-06-10	0	28	5.28	2024-06-17	0	2024-06-24	0	28	5.31	2024-07-01	0	2024-07-10	0	28.5	5.32	2024-07-17	0	2024-07-22	0	28.5	5.35	2024-07-29	0	2024-08-06	0	28.5	5.35	2024-08-12	0	2024-08-19	0	28.5	5.35	2024-08-26	1	2024-09-03	1			2025-09-10	1
M-98-88	10	Mixed	2024-06-10	0	17.5	3	2024-06-17	0	2024-06-24	0	18	3.64	2024-07-01	0	2024-07-10	0	18	4.11	2024-07-17	0	2024-07-22	0	18	4.225	2024-07-29	0	2024-08-06	0	18	4.225	2024-08-12	0	2024-08-19	1	18	4.23	2024-08-26	1	2024-09-03	1			2025-09-10	1
M-98-89	12	Mixed	2024-06-10	0	32	4.41	2024-06-17	0	2024-06-24	0	31.5	4.63	2024-07-01	0	2024-07-10	0	32	4.71	2024-07-17	0	2024-07-22	0	32	4.93	2024-07-29	0	2024-08-06	0	32	4.93	2024-08-12	0	2024-08-19	0	32	4.94	2024-08-26	0	2024-09-03	1			2025-09-10	1
M-98-90	12	Mixed	2024-06-10	0	25	4.6	2024-06-17	0	2024-06-24	0	25	4.62	2024-07-01	0	2024-07-10	0	25	4.62	2024-07-17	0	2024-07-22	0	25	4.64	2024-07-29	0	2024-08-06	0	25	4.65	2024-08-12	0	2024-08-19	0	25	4.66	2024-08-26	0	2024-09-03	1			2025-09-10	1
M-99-91	11	Mixed	2024-06-10	0	29.5	4.55	2024-06-17	0	2024-06-24	0	30	4.82	2024-07-01	0	2024-07-10	0	30	4.89	2024-07-17	0	2024-07-22	0	30	4.9	2024-07-29	0	2024-08-06	0	30.5	4.98	2024-08-12	0	2024-08-19	0	30.5	4.98	2024-08-26	1	2024-09-03	1			2025-09-10	1
M-99-92	11	Mixed	2024-06-10	0	34	3.41	2024-06-17	0	2024-06-24	0	34	4.27	2024-07-01	0	2024-07-10	0	34.5	4.3	2024-07-17	0	2024-07-22	0	34.5	4.32	2024-07-29	0	2024-08-06	0	34.5	4.33	2024-08-12	0	2024-08-19	0	34.5	4.33	2024-08-26	1	2024-09-03	1			2025-09-10	1
M-99-93	10	Mixed	2024-06-10	0	27	4.34	2024-06-17	0	2024-06-24	0	27	4.66	2024-07-01	0	2024-07-10	0	27	4.68	2024-07-17	0	2024-07-22	0	27	4.69	2024-07-29	0	2024-08-06	0	27	4.68	2024-08-12	0	2024-08-19	1	27	4.68	2024-08-26	1	2024-09-03	1			2025-09-10	1
M-99-94	8	Mixed	2024-06-10	0	33	5.02	2024-06-17	0	2024-06-24	0	33	5.51	2024-07-01	0	2024-07-10	0	33	5.52	2024-07-17	0	2024-07-22	0	33	5.605	2024-07-29	0	2024-08-06	1	33	5.62	2024-08-12	1	2024-08-19	1	33	5.62	2024-08-26	1	2024-09-03	1			2025-09-10	1
M-99-95	10	Mixed	2024-06-10	0	33	4.78	2024-06-17	0	2024-06-24	0	33	5.09	2024-07-01	0	2024-07-10	0	33	5.11	2024-07-17	0	2024-07-22	0	33	5.11	2024-07-29	0	2024-08-06	0	33	5.16	2024-08-12	0	2024-08-19	1	33	5.16	2024-08-26	1	2024-09-03	1			2025-09-10	1
R-41-01	8	Rolling	2024-06-10	0	25	3.55	2024-06-17	0	2024-06-24	0	25	3.7	2024-07-01	0	2024-07-10	0	25.5	3.7	2024-07-17	0	2024-07-22	0	25.5	3.705	2024-07-29	0	2024-08-06	1	25.5	3.705	2024-08-12	1	2024-08-19	1	25.5	3.705	2024-08-26	1	2024-09-03	1			2025-09-10	1
R-41-02	8	Rolling	2024-06-10	0	33	4.71	2024-06-17	0	2024-06-24	0	34	4.88	2024-07-01	0	2024-07-10	0	34	4.91	2024-07-17	0	2024-07-22	0	34	4.925	2024-07-29	0	2024-08-06	1	34	4.925	2024-08-12	1	2024-08-19	1	34	4.925	2024-08-26	1	2024-09-03	1			2025-09-10	1
R-41-03	9	Rolling	2024-06-10	0	31.5	4.44	2024-06-17	0	2024-06-24	0	31.5	4.63	2024-07-01	0	2024-07-10	0	32	4.65	2024-07-17	0	2024-07-22	0	32	4.66	2024-07-29	0	2024-08-06	0	32	4.66	2024-08-12	1	2024-08-19	1	32	4.66	2024-08-26	1	2024-09-03	1			2025-09-10	1
R-41-04	11	Rolling	2024-06-10	0	35.5	4.68	2024-06-17	0	2024-06-24	0	36	4.78	2024-07-01	0	2024-07-10	0	36	4.8	2024-07-17	0	2024-07-22	0	36	4.835	2024-07-29	0	2024-08-06	0	36	4.835	2024-08-12	0	2024-08-19	0	36	4.835	2024-08-26	1	2024-09-03	1			2025-09-10	1
R-41-05	9	Rolling	2024-06-10	0	25.5	3.98	2024-06-17	0	2024-06-24	0	26	4.05	2024-07-01	0	2024-07-10	0	26	4.06	2024-07-17	0	2024-07-22	0	26	4.065	2024-07-29	0	2024-08-06	0	26	4.065	2024-08-12	1	2024-08-19	1	26	4.065	2024-08-26	1	2024-09-03	1			2025-09-10	1
R-42-06	11	Rolling	2024-06-10	0	30.5	4.49	2024-06-17	0	2024-06-24	0	30.5	4.81	2024-07-01	0	2024-07-10	0	30.5	4.81	2024-07-17	0	2024-07-22	0	30.5	4.82	2024-07-29	0	2024-08-06	0	30.5	4.82	2024-08-12	0	2024-08-19	0	30.5	4.82	2024-08-26	1	2024-09-03	1			2025-09-10	1
R-42-07	12	Rolling	2024-06-10	0	27	4.1	2024-06-17	0	2024-06-24	0	27	4.4	2024-07-01	0	2024-07-10	0	27	4.47	2024-07-17	0	2024-07-22	0	27	4.485	2024-07-29	0	2024-08-06	0	27	4.485	2024-08-12	0	2024-08-19	0	27	4.485	2024-08-26	0	2024-09-03	1			2025-09-10	1
R-42-08	3	Rolling	2024-06-10	0	35	5.3	2024-06-17	0	2024-06-24	0	35	5.69	2024-07-01	1		1	35	5.69		1		1			2024-07-29	1	2024-08-06	1			2024-08-12	1	2024-08-19	1			2024-08-26	1	2024-09-03	1			2025-09-10	1
R-42-09	10	Rolling	2024-06-10	0	27	4.5	2024-06-17	0	2024-06-24	0	27	4.6	2024-07-01	0	2024-07-10	0	27	4.61	2024-07-17	0	2024-07-22	0	27	4.65	2024-07-29	0	2024-08-06	0	27	4.65	2024-08-12	0	2024-08-19	1	27	4.65	2024-08-26	1	2024-09-03	1			2025-09-10	1
R-42-10	10	Rolling	2024-06-10	0	26	4.2	2024-06-17	0	2024-06-24	0	26	4.35	2024-07-01	0	2024-07-10	0	26	4.36	2024-07-17	0	2024-07-22	0	26	4.38	2024-07-29	0	2024-08-06	0	26	4.375	2024-08-12	0	2024-08-19	1	26	4.375	2024-08-26	1	2024-09-03	1			2025-09-10	1
R-43-11	11	Rolling	2024-06-10	0	27	3.2	2024-06-17	0	2024-06-24	0	27.5	3.7	2024-07-01	0	2024-07-10	0	28	3.7	2024-07-17	0	2024-07-22	0	28	3.84	2024-07-29	0	2024-08-06	0	28	3.84	2024-08-12	0	2024-08-19	0	28	3.84	2024-08-26	1	2024-09-03	1			2025-09-10	1
R-43-12	8	Rolling	2024-06-10	0	41	5.17	2024-06-17	0	2024-06-24	0	41	5.2	2024-07-01	0	2024-07-10	0	41.5	5.4	2024-07-17	0	2024-07-22	0	41.5	4.48	2024-07-29	0	2024-08-06	1	41.5	5.49	2024-08-12	1	2024-08-19	1	41.5	5.49	2024-08-26	1	2024-09-03	1			2025-09-10	1
R-43-13	8	Rolling	2024-06-10	0	37	3.94	2024-06-17	0	2024-06-24	0	37	4.1	2024-07-01	0	2024-07-10	0	37	4.11	2024-07-17	0	2024-07-22	0	37	4.13	2024-07-29	0	2024-08-06	1	37	4.13	2024-08-12	1	2024-08-19	1	37	4.13	2024-08-26	1	2024-09-03	1			2025-09-10	1
R-43-14	7	Rolling	2024-06-10	0	29.5	4.55	2024-06-17	0	2024-06-24	0	29.5	4.7	2024-07-01	0	2024-07-10	0	29.5	4.7	2024-07-17	0	2024-07-22	0	29.5	4.77	2024-07-29	1	2024-08-06	1	29.5	4.77	2024-08-12	1	2024-08-19	1			2024-08-26	1	2024-09-03	1			2025-09-10	1
R-43-15	9	Rolling	2024-06-10	0	24.5	4.1	2024-06-17	0	2024-06-24	0	25	4.3	2024-07-01	0	2024-07-10	0	25	4.31	2024-07-17	0	2024-07-22	0	25	4.32	2024-07-29	0	2024-08-06	0	25	4.34	2024-08-12	1	2024-08-19	1	25	4.34	2024-08-26	1	2024-09-03	1			2025-09-10	1
R-44-16	9	Rolling	2024-06-10	0	31	5	2024-06-17	0	2024-06-24	0	31	5.24	2024-07-01	0	2024-07-10	0	32	5.25	2024-07-17	0	2024-07-22	0	32	5.25	2024-07-29	0	2024-08-06	0	32	5.26	2024-08-12	1	2024-08-19	1	32	5.26	2024-08-26	1	2024-09-03	1			2025-09-10	1
R-44-17	9	Rolling	2024-06-10	0	30	4.43	2024-06-17	0	2024-06-24	0	31.5	4.59	2024-07-01	0	2024-07-10	0	30.5	5.7	2024-07-17	0	2024-07-22	0	30.5	4.69	2024-07-29	0	2024-08-06	0	30.5	4.69	2024-08-12	1	2024-08-19	1	30.5	4.69	2024-08-26	1	2024-09-03	1			2025-09-10	1
R-44-18	8	Rolling	2024-06-10	0	36	4.78	2024-06-17	0	2024-06-24	0	36.5	5	2024-07-01	0	2024-07-10	0	36	5.15	2024-07-17	0	2024-07-22	0	36	5.18	2024-07-29	0	2024-08-06	1	36	5.18	2024-08-12	1	2024-08-19	1	36	5.18	2024-08-26	1	2024-09-03	1			2025-09-10	1
R-44-19	8	Rolling	2024-06-10	0	28	4.65	2024-06-17	0	2024-06-24	0	28.5	4.7	2024-07-01	0	2024-07-10	0	28.5	4.81	2024-07-17	0	2024-07-22	0	28.5	4.98	2024-07-29	0	2024-08-06	1	28.5	4.98	2024-08-12	1	2024-08-19	1	28.5	4.98	2024-08-26	1	2024-09-03	1			2025-09-10	1
R-44-20	8	Rolling	2024-06-10	0	30	3.94	2024-06-17	0	2024-06-24	0	31	4	2024-07-01	0	2024-07-10	0	30	4.04	2024-07-17	0	2024-07-22	0	30	4.17	2024-07-29	0	2024-08-06	1	30	4.17	2024-08-12	1	2024-08-19	1	30	4.17	2024-08-26	1	2024-09-03	1			2025-09-10	1
R-45-21	12	Rolling	2024-06-10	0	31	3.4	2024-06-17	0	2024-06-24	0	31.5	3.5	2024-07-01	0	2024-07-10	0	31.5	3.51	2024-07-17	0	2024-07-22	0	31.5	3.53	2024-07-29	0	2024-08-06	0	31.5	3.53	2024-08-12	0	2024-08-19	0	31.5	3.53	2024-08-26	0	2024-09-03	1			2025-09-10	1
R-45-22	7	Rolling	2024-06-10	0	25	4.19	2024-06-17	0	2024-06-24	0	25.5	4.53	2024-07-01	0	2024-07-10	0	25.5	4.6	2024-07-17	0	2024-07-22	0	25.5	4.6	2024-07-29	1	2024-08-06	1	25.5	4.64	2024-08-12	1	2024-08-19	1			2024-08-26	1	2024-09-03	1			2025-09-10	1
R-45-23	12	Rolling	2024-06-10	0	25	4	2024-06-17	0	2024-06-24	0	25	4.1	2024-07-01	0	2024-07-10	0	25	4.17	2024-07-17	0	2024-07-22	0	25	4.17	2024-07-29	0	2024-08-06	0	25	4.18	2024-08-12	0	2024-08-19	0	25	4.18	2024-08-26	0	2024-09-03	1			2025-09-10	1
R-45-24	9	Rolling	2024-06-10	0	30.5	5.65	2024-06-17	0	2024-06-24	0	31	5.67	2024-07-01	0	2024-07-10	0	31	5.67	2024-07-17	0	2024-07-22	0	31	5.67	2024-07-29	0	2024-08-06	0	31	5.67	2024-08-12	1	2024-08-19	1	31	5.67	2024-08-26	1	2024-09-03	1			2025-09-10	1
R-45-25	9	Rolling	2024-06-10	0	28	3.81	2024-06-17	0	2024-06-24	0	28	3.83	2024-07-01	0	2024-07-10	0	28	4	2024-07-17	0	2024-07-22	0	28	4.01	2024-07-29	0	2024-08-06	0	28	4.03	2024-08-12	1	2024-08-19	1	28	4.03	2024-08-26	1	2024-09-03	1			2025-09-10	1
R-46-26	12	Rolling	2024-06-10	0	23	4.44	2024-06-17	0	2024-06-24	0	23.5	4.36	2024-07-01	0	2024-07-10	0	23.5	4.7	2024-07-17	0	2024-07-22	0	23.5	4.7	2024-07-29	0	2024-08-06	0	23.5	4.72	2024-08-12	0	2024-08-19	0	23.5	4.72	2024-08-26	0	2024-09-03	1			2025-09-10	1
R-46-27	8	Rolling	2024-06-10	0	25	4.8	2024-06-17	0	2024-06-24	0	25.5	4.81	2024-07-01	0	2024-07-10	0	26	4.83	2024-07-17	0	2024-07-22	0	26	4.855	2024-07-29	0	2024-08-06	1	26	4.855	2024-08-12	1	2024-08-19	1	26	4.855	2024-08-26	1	2024-09-03	1			2025-09-10	1
R-46-28	8	Rolling	2024-06-10	0	28	4.76	2024-06-17	0	2024-06-24	0	28	4.9	2024-07-01	0	2024-07-10	0	29	5	2024-07-17	0	2024-07-22	0	29	5.03	2024-07-29	0	2024-08-06	1	29	5.03	2024-08-12	1	2024-08-19	1	29	5.03	2024-08-26	1	2024-09-03	1			2025-09-10	1
R-46-29	10	Rolling	2024-06-10	0	25	4.59	2024-06-17	0	2024-06-24	0	25.5	4.69	2024-07-01	0	2024-07-10	0	27	4.7	2024-07-17	0	2024-07-22	0	27	4.7	2024-07-29	0	2024-08-06	0	27	4.71	2024-08-12	0	2024-08-19	1	27	4.71	2024-08-26	1	2024-09-03	1			2025-09-10	1
R-46-30	9	Rolling	2024-06-10	0	38	4.6	2024-06-17	0	2024-06-24	0	38.5	5	2024-07-01	0	2024-07-10	0	38.5	5.2	2024-07-17	0	2024-07-22	0	38.5	5.125	2024-07-29	0	2024-08-06	0	38.5	5.125	2024-08-12	1	2024-08-19	1	38.5	5.125	2024-08-26	1	2024-09-03	1			2025-09-10	1
R-47-31	8	Rolling	2024-06-10	0	31	4.88	2024-06-17	0	2024-06-24	0	31	4.45	2024-07-01	0	2024-07-10	0	31.5	4.95	2024-07-17	0	2024-07-22	0	31.5	5.015	2024-07-29	0	2024-08-06	1	31.5	5.015	2024-08-12	1	2024-08-19	1	31.5	5	2024-08-26	1	2024-09-03	1			2025-09-10	1
R-47-32	10	Rolling	2024-06-10	0	22	5.1	2024-06-17	0	2024-06-24	0	22	5.3	2024-07-01	0	2024-07-10	0	22	5.4	2024-07-17	0	2024-07-22	0	22	5.4	2024-07-29	0	2024-08-06	0	22	5.4	2024-08-12	0	2024-08-19	1	22	5.4	2024-08-26	1	2024-09-03	1			2025-09-10	1
R-47-33	11	Rolling	2024-06-10	0	31	4.7	2024-06-17	0	2024-06-24	0	31	5.1	2024-07-01	0	2024-07-10	0	31.5	5.13	2024-07-17	0	2024-07-22	0	31.5	5.17	2024-07-29	0	2024-08-06	0	31.5	5.17	2024-08-12	0	2024-08-19	0	31.5	5.17	2024-08-26	1	2024-09-03	1			2025-09-10	1
R-47-34	10	Rolling	2024-06-10	0	37	5.79	2024-06-17	0	2024-06-24	0	37.5	6.1	2024-07-01	0	2024-07-10	0	39	6.42	2024-07-17	0	2024-07-22	0	39	6.595	2024-07-29	0	2024-08-06	0	39	6.61	2024-08-12	0	2024-08-19	1	39	6.61	2024-08-26	1	2024-09-03	1			2025-09-10	1
R-47-35	10	Rolling	2024-06-10	0	39	5.74	2024-06-17	0	2024-06-24	0	39	5.79	2024-07-01	0	2024-07-10	0	39.5	5.79	2024-07-17	0	2024-07-22	0	39.5	5.785	2024-07-29	0	2024-08-06	0	39.5	5.785	2024-08-12	0	2024-08-19	1	39.5	5.785	2024-08-26	1	2024-09-03	1			2025-09-10	1
R-48-36	10	Rolling	2024-06-10	0	25	4.02	2024-06-17	0	2024-06-24	0	25.5	4.07	2024-07-01	0	2024-07-10	0	26	4.1	2024-07-17	0	2024-07-22	0	26	4.5	2024-07-29	0	2024-08-06	0	26	4.5	2024-08-12	0	2024-08-19	1	26	4.5	2024-08-26	1	2024-09-03	1			2025-09-10	1
R-48-37	10	Rolling	2024-06-10	0	38.5	5.07	2024-06-17	0	2024-06-24	0	38.5	5.1	2024-07-01	0	2024-07-10	0	38.5	5.1	2024-07-17	0	2024-07-22	0	38.5	5.115	2024-07-29	0	2024-08-06	0	38.5	5.115	2024-08-12	0	2024-08-19	1	38.5	5.115	2024-08-26	1	2024-09-03	1			2025-09-10	1
R-48-38	11	Rolling	2024-06-10	0	25.5	3.8	2024-06-17	0	2024-06-24	0	26.5	4.31	2024-07-01	0	2024-07-10	0	26.5	4.81	2024-07-17	0	2024-07-22	0	26.5	4.85	2024-07-29	0	2024-08-06	0	26.5	4.85	2024-08-12	0	2024-08-19	0	26.5	4.85	2024-08-26	1	2024-09-03	1			2025-09-10	1
R-48-39	10	Rolling	2024-06-10	0	34	5.37	2024-06-17	0	2024-06-24	0	34.5	5.67	2024-07-01	0	2024-07-10	0	34.5	5.7	2024-07-17	0	2024-07-22	0	34.5	5.935	2024-07-29	0	2024-08-06	0	34.5	5.935	2024-08-12	0	2024-08-19	1	34.5	5.935	2024-08-26	1	2024-09-03	1			2025-09-10	1
R-48-40	9	Rolling	2024-06-10	0	36	5.54	2024-06-17	0	2024-06-24	0	37	5.58	2024-07-01	0	2024-07-10	0	37	5.62	2024-07-17	0	2024-07-22	0	37.5	5.77	2024-07-29	0	2024-08-06	0	37.5	5.77	2024-08-12	1	2024-08-19	1	37.5	5.77	2024-08-26	1	2024-09-03	1			2025-09-10	1
R-49-41	8	Rolling	2024-06-10	0	31	4.52	2024-06-17	0	2024-06-24	0	31.5	4.7	2024-07-01	0	2024-07-10	0	31.5	4.83	2024-07-17	0	2024-07-22	0	31.5	4.84	2024-07-29	0	2024-08-06	1	31.5	4.84	2024-08-12	1	2024-08-19	1	31.5	4.84	2024-08-26	1	2024-09-03	1			2025-09-10	1
R-49-42	7	Rolling	2024-06-10	0	27.5	4.29	2024-06-17	0	2024-06-24	0	28	4.33	2024-07-01	0	2024-07-10	0	29	4.34	2024-07-17	0	2024-07-22	0	29	4.33	2024-07-29	1	2024-08-06	1	29	4.35	2024-08-12	1	2024-08-19	1			2024-08-26	1	2024-09-03	1			2025-09-10	1
R-49-43	8	Rolling	2024-06-10	0	33	5.13	2024-06-17	0	2024-06-24	0	33	5.2	2024-07-01	0	2024-07-10	0	33.5	5.24	2024-07-17	0	2024-07-22	0	33.5	5.28	2024-07-29	0	2024-08-06	1	33.5	5.28	2024-08-12	1	2024-08-19	1	33.5	5.28	2024-08-26	1	2024-09-03	1			2025-09-10	1
R-49-44	9	Rolling	2024-06-10	0	29	4.4	2024-06-17	0	2024-06-24	0	29	4.45	2024-07-01	0	2024-07-10	0	29.5	4.46	2024-07-17	0	2024-07-22	0	29.5	4.455	2024-07-29	0	2024-08-06	0	29.5	4.455	2024-08-12	1	2024-08-19	1	29.5	4.455	2024-08-26	1	2024-09-03	1			2025-09-10	1
R-49-45	9	Rolling	2024-06-10	0	28	4.7	2024-06-17	0	2024-06-24	0	28	4.78	2024-07-01	0	2024-07-10	0	28.5	5	2024-07-17	0	2024-07-22	0	28.5	4.66	2024-07-29	0	2024-08-06	0	28.5	4.66	2024-08-12	1	2024-08-19	1	28.5	4.66	2024-08-26	1	2024-09-03	1			2025-09-10	1
R-50-46	11	Rolling	2024-06-10	0	28	4.8	2024-06-17	0	2024-06-24	0	29	4.9	2024-07-01	0	2024-07-10	0	28.5	4.9	2024-07-17	0	2024-07-22	0	28.5	4.94	2024-07-29	0	2024-08-06	0	28.5	4.94	2024-08-12	0	2024-08-19	0	28.5	4.94	2024-08-26	1	2024-09-03	1			2025-09-10	1
R-50-47	10	Rolling	2024-06-10	0	35	4.18	2024-06-17	0	2024-06-24	0	35	4.2	2024-07-01	0	2024-07-10	0	35	4.32	2024-07-17	0	2024-07-22	0	35	4.36	2024-07-29	0	2024-08-06	0	35	4.37	2024-08-12	0	2024-08-19	1	35	4.37	2024-08-26	1	2024-09-03	1			2025-09-10	1
R-50-48	10	Rolling	2024-06-10	0	33	4.79	2024-06-17	0	2024-06-24	0	33	4.83	2024-07-01	0	2024-07-10	0	33	4.85	2024-07-17	0	2024-07-22	0	33	4.89	2024-07-29	0	2024-08-06	0	33	4.89	2024-08-12	0	2024-08-19	1	33	4.89	2024-08-26	1	2024-09-03	1			2025-09-10	1
R-50-49	12	Rolling	2024-06-10	0	30.5	4.2	2024-06-17	0	2024-06-24	0	31.5	4.1	2024-07-01	0	2024-07-10	0	33.5	4.18	2024-07-17	0	2024-07-22	0	33.5	4.39	2024-07-29	0	2024-08-06	0	33.5	4.39	2024-08-12	0	2024-08-19	0	33.5	4.39	2024-08-26	0	2024-09-03	1			2025-09-10	1
R-50-50	7	Rolling	2024-06-10	0	38	4.61	2024-06-17	0	2024-06-24	0	38	5.08	2024-07-01	0	2024-07-10	0	38	5.12	2024-07-17	0	2024-07-22	0	38	5.15	2024-07-29	1	2024-08-06	1	38	5.17	2024-08-12	1	2024-08-19	1			2024-08-26	1	2024-09-03	1			2025-09-10	1
R-51-51	11	Rolling	2024-06-10	0	26	4.37	2024-06-17	0	2024-06-24	0	26	4.37	2024-07-01	0	2024-07-10	0	26	4.37	2024-07-17	0	2024-07-22	0	26	4.36	2024-07-29	0	2024-08-06	0	26	4.37	2024-08-12	0	2024-08-19	0	26	4.37	2024-08-26	1	2024-09-03	1			2025-09-10	1
R-51-52	10	Rolling	2024-06-10	0	20.5	3.19	2024-06-17	0	2024-06-24	0	21	3.55	2024-07-01	0	2024-07-10	0	21	3.6	2024-07-17	0	2024-07-22	0	21	3.61	2024-07-29	0	2024-08-06	0	21	3.62	2024-08-12	0	2024-08-19	1	21	3.62	2024-08-26	1	2024-09-03	1			2025-09-10	1
R-51-53	8	Rolling	2024-06-10	0	29	4.8	2024-06-17	0	2024-06-24	0	30	4.88	2024-07-01	0	2024-07-10	0	30	4.89	2024-07-17	0	2024-07-22	0	30	4.855	2024-07-29	0	2024-08-06	1	30	4.855	2024-08-12	1	2024-08-19	0	30	4.855	2024-08-26	1	2024-09-03	1			2025-09-10	1
R-51-54	10	Rolling	2024-06-10	0	30	3.8	2024-06-17	0	2024-06-24	0	31	4.3	2024-07-01	0	2024-07-10	0	31	4.4	2024-07-17	0	2024-07-22	0	31	4.41	2024-07-29	0	2024-08-06	0	31	4.42	2024-08-12	0	2024-08-19	1	31	4.42	2024-08-26	1	2024-09-03	1			2025-09-10	1
R-51-55	10	Rolling	2024-06-10	0	33	4.35	2024-06-17	0	2024-06-24	0	33	4.52	2024-07-01	0	2024-07-10	0	33	4.85	2024-07-17	0	2024-07-22	0	33	5.215	2024-07-29	0	2024-08-06	0	33	5.22	2024-08-12	0	2024-08-19	1	33	5.22	2024-08-26	1	2024-09-03	1			2025-09-10	1
R-52-56	8	Rolling	2024-06-10	0	30.5	4	2024-06-17	0	2024-06-24	0	31.5	4.25	2024-07-01	0	2024-07-10	0	31.5	4.26	2024-07-17	0	2024-07-22	0	31.5	4.27	2024-07-29	0	2024-08-06	1	31.5	4.28	2024-08-12	1	2024-08-19	1	31.5	4.28	2024-08-26	1	2024-09-03	1			2025-09-10	1
R-52-57	12	Rolling	2024-06-10	0	25	3.78	2024-06-17	0	2024-06-24	0	25	3.8	2024-07-01	0	2024-07-10	0	25	3.8	2024-07-17	0	2024-07-22	0	25	3.81	2024-07-29	0	2024-08-06	0	25	3.84	2024-08-12	0	2024-08-19	0	25	3.84	2024-08-26	0	2024-09-03	1			2025-09-10	1
R-52-58	9	Rolling	2024-06-10	0	26.5	4.22	2024-06-17	0	2024-06-24	0	26.5	4.4	2024-07-01	0	2024-07-10	0	27	4.6	2024-07-17	0	2024-07-22	0	27	4.645	2024-07-29	0	2024-08-06	0	27	4.66	2024-08-12	1	2024-08-19	1	27	4.66	2024-08-26	1	2024-09-03	1			2025-09-10	1
R-52-59	10	Rolling	2024-06-10	0	26	4.18	2024-06-17	0	2024-06-24	0	26	4.45	2024-07-01	0	2024-07-10	0	26	4.7	2024-07-17	0	2024-07-22	0	26	4.7	2024-07-29	0	2024-08-06	0	26	4.69	2024-08-12	0	2024-08-19	1	26	4.69	2024-08-26	1	2024-09-03	1			2025-09-10	1
R-52-60	11	Rolling	2024-06-10	0	29	4.6	2024-06-17	0	2024-06-24	0	29	4.9	2024-07-01	0	2024-07-10	0	29	4.9	2024-07-17	0	2024-07-22	0	29	4.92	2024-07-29	0	2024-08-06	0	29	4.91	2024-08-12	0	2024-08-19	0	29	4.91	2024-08-26	1	2024-09-03	1			2025-09-10	1
R-53-61	10	Rolling	2024-06-10	0	33	5.09	2024-06-17	0	2024-06-24	0	33	5.2	2024-07-01	0	2024-07-10	0	33	5.36	2024-07-17	0	2024-07-22	0	33	5.385	2024-07-29	0	2024-08-06	0	33	5.385	2024-08-12	0	2024-08-19	1	33	5.385	2024-08-26	1	2024-09-03	1			2025-09-10	1
R-53-62	12	Rolling	2024-06-10	0	31.5	4.35	2024-06-17	0	2024-06-24	0	34	4.75	2024-07-01	0	2024-07-10	0	34.5	4.77	2024-07-17	0	2024-07-22	0	34.5	4.78	2024-07-29	0	2024-08-06	0	34.5	4.78	2024-08-12	0	2024-08-19	0	34.5	4.78	2024-08-26	0	2024-09-03	1			2025-09-10	1
R-53-63	10	Rolling	2024-06-10	0	24	4.42	2024-06-17	0	2024-06-24	0	30	4.6	2024-07-01	0	2024-07-10	0	31	4.83	2024-07-17	0	2024-07-22	0	31	4.85	2024-07-29	0	2024-08-06	0	31	4.85	2024-08-12	0	2024-08-19	1	31	4.85	2024-08-26	1	2024-09-03	1			2025-09-10	1
R-53-64	8	Rolling	2024-06-10	0	31	4.9	2024-06-17	0	2024-06-24	0	31.5	5.2	2024-07-01	0	2024-07-10	0	32	5.21	2024-07-17	0	2024-07-22	0	32.5	5.22	2024-07-29	0	2024-08-06	1	32.5	5.21	2024-08-12	1	2024-08-19	1	32.5	5.215	2024-08-26	1	2024-09-03	1			2025-09-10	1
R-53-65	8	Rolling	2024-06-10	0	29	4.78	2024-06-17	0	2024-06-24	0	30	4.9	2024-07-01	0	2024-07-10	0	30.5	4.9	2024-07-17	0	2024-07-22	0	29.5	5.02	2024-07-29	0	2024-08-06	1	29.5	5.04	2024-08-12	1	2024-08-19	1			2024-08-26	1	2024-09-03	1			2025-09-10	1
R-54-66	9	Rolling	2024-06-10	0	31.5	4.84	2024-06-17	0	2024-06-24	0	31	4.9	2024-07-01	0	2024-07-10	0	31.5	4.85	2024-07-17	0	2024-07-22	0	31.5	4.965	2024-07-29	0	2024-08-06	0	31.5	4.97	2024-08-12	1	2024-08-19	1	31.5	4.97	2024-08-26	1	2024-09-03	1			2025-09-10	1
R-54-67	9	Rolling	2024-06-10	0	32.5	4.6	2024-06-17	0	2024-06-24	0	32.5	5	2024-07-01	0	2024-07-10	0	32.5	5.02	2024-07-17	0	2024-07-22	0	32.5	5.03	2024-07-29	0	2024-08-06	0	32.5	5.02	2024-08-12	1	2024-08-19	1	32.5	5.02	2024-08-26	1	2024-09-03	1			2025-09-10	1
R-54-68	8	Rolling	2024-06-10	0	33	4.9	2024-06-17	0	2024-06-24	0	33	5.12	2024-07-01	0	2024-07-10	0	33	5.2	2024-07-17	0	2024-07-22	0	33	5.545	2024-07-29	0	2024-08-06	1	33	5.57	2024-08-12	1	2024-08-19	1	33	5.57	2024-08-26	1	2024-09-03	1			2025-09-10	1
R-54-69	10	Rolling	2024-06-10	0	27	5	2024-06-17	0	2024-06-24	0	27.5	5.3	2024-07-01	0	2024-07-10	0	27.5	5.33	2024-07-17	0	2024-07-22	0	27.5	5.62	2024-07-29	0	2024-08-06	0	27.5	5.62	2024-08-12	0	2024-08-19	1	27.5	5.62	2024-08-26	1	2024-09-03	1			2025-09-10	1
R-54-70	10	Rolling	2024-06-10	0	39	5.3	2024-06-17	0	2024-06-24	0	39.5	5.3	2024-07-01	0	2024-07-10	0	39.5	5.5	2024-07-17	0	2024-07-22	0	39.5	5.89	2024-07-29	0	2024-08-06	0	39.5	5.93	2024-08-12	0	2024-08-19	1	39.5	5.93	2024-08-26	1	2024-09-03	1			2025-09-10	1
R-55-71	10	Rolling	2024-06-10	0	24	3.7	2024-06-17	0	2024-06-24	0	24	3.95	2024-07-01	0	2024-07-10	0	25	3.95	2024-07-17	0	2024-07-22	0	25	3.95	2024-07-29	0	2024-08-06	0	25	3.95	2024-08-12	0	2024-08-19	1	25	3.95	2024-08-26	1	2024-09-03	1			2025-09-10	1
R-55-72	8	Rolling	2024-06-10	0	25	3.9	2024-06-17	0	2024-06-24	0	25	4.1	2024-07-01	0	2024-07-10	0	26	4.05	2024-07-17	0	2024-07-22	0	26	4.07	2024-07-29	0	2024-08-06	1	26	4.07	2024-08-12	1	2024-08-19	1	26	4.09	2024-08-26	1	2024-09-03	1			2025-09-10	1
R-55-73	8	Rolling	2024-06-10	0	27.5	4	2024-06-17	0	2024-06-24	0	28	4.1	2024-07-01	0	2024-07-10	0	29	4.3	2024-07-17	0	2024-07-22	0	29	4.255	2024-07-29	0	2024-08-06	1	29	4.255	2024-08-12	1	2024-08-19	1	29	4.255	2024-08-26	1	2024-09-03	1			2025-09-10	1
R-55-74	2	Rolling	2024-06-10	0	28.5	3.9	2024-06-17	0	2024-06-24	0	29	4.1	2024-07-01	0	2024-07-10	0	29	4.1	2024-07-17	0	2024-07-22	0	29	4.105	2024-07-29	0	2024-08-06	0	29	4.105	2024-08-12	0	2024-08-19	0	29	4.105	2024-08-26	0	2024-09-03	1			2025-09-10	1
R-55-75	7	Rolling	2024-06-10	0	29	4.5	2024-06-17	0	2024-06-24	0	29.5	4.7	2024-07-01	0	2024-07-10	0	30	4.7	2024-07-17	0	2024-07-22	0	30	4.845	2024-07-29	1	2024-08-06	1	30	4.8	2024-08-12	1	2024-08-19	1			2024-08-26	1	2024-09-03	1			2025-09-10	1
R-56-76	11	Rolling	2024-06-10	0	30	4.71	2024-06-17	0	2024-06-24	0	30	4.8	2024-07-01	0	2024-07-10	0	30	4.8	2024-07-17	0	2024-07-22	0	30	4.79	2024-07-29	0	2024-08-06	0	30	4.79	2024-08-12	0	2024-08-19	0	30	4.79	2024-08-26	1	2024-09-03	1			2025-09-10	1
R-56-77	11	Rolling	2024-06-10	0	29.5	3.75	2024-06-17	0	2024-06-24	0	29.5	4.52	2024-07-01	0	2024-07-10	0	29.5	4.61	2024-07-17	0	2024-07-22	0	29.5	4.69	2024-07-29	0	2024-08-06	0	29.5	4.69	2024-08-12	0	2024-08-19	0	29.5	4.69	2024-08-26	1	2024-09-03	1			2025-09-10	1
R-56-78	7	Rolling	2024-06-10	0	39	5.8	2024-06-17	0	2024-06-24	0	39	5.92	2024-07-01	0	2024-07-10	0	39.5	6.26	2024-07-17	0	2024-07-22	0	39.5	6.34	2024-07-29	1	2024-08-06	1	39.5	6.35	2024-08-12	1	2024-08-19	1			2024-08-26	1	2024-09-03	1			2025-09-10	1
R-56-79	9	Rolling	2024-06-10	0	32	4.38	2024-06-17	0	2024-06-24	0	32	4.6	2024-07-01	0	2024-07-10	0	32	4.6	2024-07-17	0	2024-07-22	0	32	4.61	2024-07-29	0	2024-08-06	0	32	4.61	2024-08-12	1	2024-08-19	1	32	4.61	2024-08-26	1	2024-09-03	1			2025-09-10	1
R-56-80	1	Rolling	2024-06-10	0	32	4.86	2024-06-17	1	2024-06-24	1	38	5.12	2024-07-01	1	2024-07-10	1				0		1			2024-07-29	1	2024-08-06	1			2024-08-12	1	2024-08-19	1			2024-08-26	1	2024-09-03	1			2025-09-10	1
R-57-81	9	Rolling	2024-06-10	0	34.5	5.8	2024-06-17	0	2024-06-24	0	34.5	5.96	2024-07-01	0	2024-07-10	0	35	6.04	2024-07-17	0	2024-07-22	0	35	6.21	2024-07-29	0	2024-08-06	0	35	6.21	2024-08-12	1	2024-08-19	1	35	6.21	2024-08-26	1	2024-09-03	1			2025-09-10	1
R-57-82	10	Rolling	2024-06-10	0	36	6.08	2024-06-17	0	2024-06-24	0	36	6.2	2024-07-01	0	2024-07-10	0	37	6.33	2024-07-17	0	2024-07-22	0	37	6.44	2024-07-29	0	2024-08-06	0	37	6.44	2024-08-12	0	2024-08-19	1	37	6.44	2024-08-26	1	2024-09-03	1			2025-09-10	1
R-57-83	8	Rolling	2024-06-10	0	34	5.42	2024-06-17	0	2024-06-24	0	35	5.79	2024-07-01	0	2024-07-10	0	35	5.9	2024-07-17	0	2024-07-22	0	35	5.92	2024-07-29	0	2024-08-06	1	35	5.92	2024-08-12	1	2024-08-19	1	35	5.92	2024-08-26	1	2024-09-03	1			2025-09-10	1
R-57-84	9	Rolling	2024-06-10	0	31.5	4.4	2024-06-17	0	2024-06-24	0	31	4.42	2024-07-01	0	2024-07-10	0	32	4.45	2024-07-17	0	2024-07-22	0	32	4.46	2024-07-29	0	2024-08-06	0	32	4.46	2024-08-12	1	2024-08-19	1	32	4.46	2024-08-26	1	2024-09-03	1			2025-09-10	1
R-57-85	8	Rolling	2024-06-10	0	34	4.9	2024-06-17	0	2024-06-24	0	34.5	5.1	2024-07-01	0	2024-07-10	0	35	5.17	2024-07-17	0	2024-07-22	0	35	5.15	2024-07-29	0	2024-08-06	1	35	5.15	2024-08-12	1	2024-08-19	1	35	5.15	2024-08-26	1	2024-09-03	1			2025-09-10	1
R-58-86	8	Rolling	2024-06-10	0	32	3.83	2024-06-17	0	2024-06-24	0	32	4.2	2024-07-01	0	2024-07-10	0	31.5	4.3	2024-07-17	0	2024-07-22	0	31.5	4.32	2024-07-29	0	2024-08-06	1	31.5	4.32	2024-08-12	1	2024-08-19	1	31.5	4.32	2024-08-26	1	2024-09-03	1			2025-09-10	1
R-58-87	9	Rolling	2024-06-10	0	38	4.78	2024-06-17	0	2024-06-24	0	39	4.8	2024-07-01	0	2024-07-10	0	39	4.81	2024-07-17	0	2024-07-22	0	39	4.61	2024-07-29	0	2024-08-06	0	39	4.61	2024-08-12	1	2024-08-19	1	39	4.61	2024-08-26	1	2024-09-03	1			2025-09-10	1
R-58-88	9	Rolling	2024-06-10	0	32.5	3.5	2024-06-17	0	2024-06-24	0	33	3.8	2024-07-01	0	2024-07-10	0	33	4.4	2024-07-17	0	2024-07-22	0	33	4.44	2024-07-29	0	2024-08-06	0	33	4.44	2024-08-12	1	2024-08-19	1	33	4.44	2024-08-26	1	2024-09-03	1			2025-09-10	1
R-58-89	11	Rolling	2024-06-10	0	26.5	4.1	2024-06-17	0	2024-06-24	0	26.5	4.13	2024-07-01	0	2024-07-10	0	26.5	4.15	2024-07-17	0	2024-07-22	0	26.5	4.16	2024-07-29	0	2024-08-06	0	26.5	4.16	2024-08-12	0	2024-08-19	0	26.5	4.16	2024-08-26	1	2024-09-03	1			2025-09-10	1
R-58-90	8	Rolling	2024-06-10	0	34	4.3	2024-06-17	0	2024-06-24	0	34	4.52	2024-07-01	0	2024-07-10	0	34	4.69	2024-07-17	0	2024-07-22	0	34	4.725	2024-07-29	0	2024-08-06	1	34	4.725	2024-08-12	1	2024-08-19	1	34	4.725	2024-08-26	1	2024-09-03	1			2025-09-10	1
R-59-91	11	Rolling	2024-06-10	0	19.5	4.04	2024-06-17	0	2024-06-24	0	19.5	4.2	2024-07-01	0	2024-07-10	0	20	4.2	2024-07-17	0	2024-07-22	0	20	4.21	2024-07-29	0	2024-08-06	0	20	4.21	2024-08-12	0	2024-08-19	0	20	4.21	2024-08-26	1	2024-09-03	1			2025-09-10	1
R-59-92	1	Rolling	2024-06-10	0	33	3.71	2024-06-17	1	2024-06-24	1	34	3.75	2024-07-01	1		1				1	2024-07-22	1			2024-07-29	1	2024-08-06	1			2024-08-12	1	2024-08-19	1			2024-08-26	1	2024-09-03	1			2025-09-10	1
R-59-93	11	Rolling	2024-06-10	0	19.5	3.9	2024-06-17	0	2024-06-24	0	20	4.4	2024-07-01	0	2024-07-10	0	20	4.4	2024-07-17	0	2024-07-22	0	20	4.5	2024-07-29	0	2024-08-06	0	20	4.45	2024-08-12	0	2024-08-19	0	20	4.45	2024-08-26	1	2024-09-03	1			2025-09-10	1
R-59-94	7	Rolling	2024-06-10	0	25	4	2024-06-17	0	2024-06-24	0	25	4.02	2024-07-01	0	2024-07-10	0	25	4.05	2024-07-17	0	2024-07-22	0	25	4.075	2024-07-29	1	2024-08-06	1	25	4.11	2024-08-12	1	2024-08-19	1			2024-08-26	1	2024-09-03	1			2025-09-10	1
R-59-95	3	Rolling	2024-06-10	0	27	4.17	2024-06-17	0	2024-06-24	0	27.5	4.62	2024-07-01	1		1	27.5	4.63		1	2024-07-22	1			2024-07-29	1	2024-08-06	1			2024-08-12	1	2024-08-19	1			2024-08-26	1	2024-09-03	1			2025-09-10	1
R-60-96	8	Rolling	2024-06-10	0	23	4.46	2024-06-17	0	2024-06-24	0	23.5	4.63	2024-07-01	0	2024-07-10	0	23.5	5.86	2024-07-17	0	2024-07-22	0	24	5.89	2024-07-29	0	2024-08-06	1	24	5.9	2024-08-12	1	2024-08-19	1	24	5.9	2024-08-26	1	2024-09-03	1			2025-09-10	1
R-60-97	10	Rolling	2024-06-10	0	27	4	2024-06-17	0	2024-06-24	0	28	3.81	2024-07-01	0	2024-07-10	0	28	3.75	2024-07-17	0	2024-07-22	0	28	4.155	2024-07-29	0	2024-08-06	0	28	4.2	2024-08-12	0	2024-08-19	1	28	4.2	2024-08-26	1	2024-09-03	1			2025-09-10	1
R-60-98	12	Rolling	2024-06-10	0	30	3.6	2024-06-17	0	2024-06-24	0	31	4.2	2024-07-01	0	2024-07-10	0	31	4.59	2024-07-17	0	2024-07-22	0	31	4.65	2024-07-29	0	2024-08-06	0	31.5	4.8	2024-08-12	0	2024-08-19	0	31.5	4.8	2024-08-26	0	2024-09-03	1			2025-09-10	1
R-60-99	10	Rolling	2024-06-10	0	32	3.8	2024-06-17	0	2024-06-24	0	33	3.85	2024-07-01	0	2024-07-10	0	33	3.87	2024-07-17	0	2024-07-22	0	33	3.88	2024-07-29	0	2024-08-06	0	33	3.88	2024-08-12	0	2024-08-19	1	33	3.88	2024-08-26	1	2024-09-03	1			2025-09-10	1

## Sheet: subset_measurements
ID	treatment	date_0	etr_0	gs_0	ps2_0	fvfm_0	date_01	etr_01	gs_01	ps2_01	fvfm_01	date_02	etr_02	gs_02	ps2_02	fvfm_02	date_03	etr_03	gs_03	ps2_03	fvfm_03	date_04	etr_04	gs_04	ps2_04	fvfm_04	date_05	etr_05	gs_05	ps2_05	fvfm_05	date_06	etr_06	gs_06	ps2_06	fvfm_06	date_07	etr_07	gs_07	ps2_07	fvfm_07	date_08	etr_08	gs_08	ps2_08	fvfm_08	date_09	etr_09	gs_09
C-02-09	Control	2024-06-11	82.8	0.077	0.67	0.8	2024-06-18	83.8	0.033	0.63	0.78	2024-06-25	63.4	0.03	0.57	0.76	2024-07-02	31	0.007	0.4	0.74	2024-07-09	11.1	0.002	0.15	0.73	2024-07-16	7	0.001	0.07	0.66	2024-07-24	12.9	0	0.04	0.56	2024-07-29					2024-08-06					2024-08-13
C-05-25	Control	2024-06-11	92.8	0.126	0.67	0.8	2024-06-18	101.1	0.067	0.47	0.8	2024-06-25	43.1	0.003	0.42	0.77	2024-07-02	101.5	0.006	0.28	0.78	2024-07-09	27.1	0.002	0.24	0.78	2024-07-16	11.3	0.004	0.2	0.78	2024-07-24	2.3	0.002	0.14	0.68	2024-07-29	6.9	0.001	0.11	0.59	2024-08-06	18	0	0	0.29	2024-08-13	0	0
C-07-35	Control	2024-06-11	90.3	0.102	0.64	0.8	2024-06-18	68.8	0.086	0.54	0.81	2024-06-25	42.2	0.027	0.54	0.8	2024-07-02	45.2	0.01	0.5	0.76	2024-07-09	0.9	0.001	0.08	0.75	2024-07-16	11.6	0.004	0.18	0.78	2024-07-24	11.2	0.005	0.12	0.71	2024-07-29	7.9	0	0.06	0.61	2024-08-06	5.4	0.001	0.14	0.68	2024-08-13	5.5	0.001
C-08-39	Control	2024-06-11	70.4	0.069	0.66	0.78	2024-06-18	70.6	0.034	0.57	0.68	2024-06-25	64.4	0.005	0.36	0.69	2024-07-02	48	0.003	0.17	0.66	2024-07-09	14.6	0	0.07	0.69	2024-07-16	12.2	0	0.11	0.49	2024-07-24	12.8	0.005	0.18	0.5	2024-07-29	11.5	0	0.12	0.15	2024-08-06	0	0	0	0.1	2024-08-13	0	0
C-09-42	Control	2024-06-11	74.8	0.077	0.55	0.78	2024-06-18	55	0.03	0.52	0.78	2024-06-25	31.1	0.002	0.13	0.74	2024-07-02	19.8	0	0.09	0.72	2024-07-09	21.4	0	0.06	0.72	2024-07-16	14.5	0.003	0.12	0.58	2024-07-24					2024-07-29					2024-08-06					2024-08-13
C-10-48	Control	2024-06-11	92.3	0.063	0.68	0.77	2024-06-18	62.5	0.04	0.54	0.77	2024-06-25	79.7	0.021	0.33	0.75	2024-07-02	98.3	0	0.12	0.73	2024-07-09	29.7	0	0.1	0.66	2024-07-16	29	0	0.07	0.42	2024-07-24					2024-07-29					2024-08-06					2024-08-13
C-12-56	Control	2024-06-11	102.8	0.092	0.69	0.79	2024-06-18	82.4	0.027	0.59	0.74	2024-06-25	69.7	0.036	0.36	0.71	2024-07-02	52.9	0	0.24	0.71	2024-07-09	21.8	0	0.09	0.69	2024-07-16	5.3	0	0.03	0.3	2024-07-24					2024-07-29					2024-08-06					2024-08-13
C-12-60	Control	2024-06-11	98.8	0.084	0.65	0.78	2024-06-18	88.8	0.027	0.57	0.76	2024-06-25	62.4	0.013	0.34	0.71	2024-07-02	33.4	0	0.35	0.75	2024-07-09	6.2	0	0.1	0.72	2024-07-16	3.5	0	0.11	0.59	2024-07-24					2024-07-29					2024-08-06					2024-08-13
C-13-63	Control	2024-06-11	83.9	0.08	0.57	0.73	2024-06-18	76.8	0.051	0.55	0.79	2024-06-25	84.8	0.016	0.18	0.74	2024-07-02	34.8	0.004	0.12	0.68	2024-07-09	12.2	0	0.02	0.29	2024-07-16					2024-07-24					2024-07-29					2024-08-06					2024-08-13
C-14-69	Control	2024-06-11	85.2	0.108	0.67	0.82	2024-06-18	86.5	0.016	0.5	0.8	2024-06-25	45.3	0	0.32	0.75	2024-07-02	14.2	0	0.14	0.67	2024-07-09	3.6	0	0.05	0.53	2024-07-16	8.7	0	0.16	0.55	2024-07-24	0	0			2024-07-29					2024-08-06					2024-08-13
C-15-72	Control	2024-06-11	100.3	0.089	0.55	0.79	2024-06-18	86.1	0.049	0.64	0.79	2024-06-25	72.9	0.02	0.59	0.75	2024-07-02	17.2	0.009	0.33	0.75	2024-07-09	24.7	0.001	0.11	0.76	2024-07-16	23.1	0	0.1	0.72	2024-07-24	13.8	0.001	0.05	0.48	2024-07-29					2024-08-06					2024-08-13
C-17-84	Control	2024-06-11	94.9	0.083	0.63	0.79	2024-06-18	79.8	0.057	0.61	0.74	2024-06-25	57.1	0.013	0.38	0.76	2024-07-02	16.2	0.003	0.2	0.72	2024-07-09	18.8	0	0.08	0.66	2024-07-16	16	0	0.15	0.59	2024-07-24					2024-07-29					2024-08-06					2024-08-13
C-23-113	Control	2024-06-11	85.3	0.125	0.65	0.82	2024-06-18	115	0.073	0.65	0.8	2024-06-25	100.9	0.012	0.56	0.8	2024-07-02	78	0.037	0.53	0.83	2024-07-09	65.2	0.01	0.31	0.8	2024-07-16	9.4	0.005	0.13	0.78	2024-07-24	0	0	0.07	0.65	2024-07-29					2024-08-06					2024-08-13
C-25-121	Control	2024-06-11	95.9	0.098	0.72	0.75	2024-06-18	24.9	0.119	0.73	0.81	2024-06-25	33.1	0.064	0.69	0.78	2024-07-02	58.5	0.009	0.76	0.74	2024-07-09	29.2	0.001	0.65	0.8	2024-07-16	17.1	0.001	0.24	0.75	2024-07-24	2	0	0.17	0.61	2024-07-29	13.2	0	0.04	0.52	2024-08-06					2024-08-13
C-26-129	Control	2024-06-11	90.7	0.119	0.67	0.79	2024-06-18	75.7	0.07	0.61	0.8	2024-06-25	79.4	0.009	0.33	0.77	2024-07-02	65.4	0.029	0.47	0.75	2024-07-09	32.6	0.002	0.01	0.76	2024-07-16	24	0.004	0.09	0.67	2024-07-24	15.7	0.006	0.13	0.54	2024-07-29					2024-08-06					2024-08-13
C-29-142	Control	2024-06-11	90	0.107	0.58	0.76	2024-06-18	85.3	0.072	0.48	0.79	2024-06-25	63	0.001	0.24	0.76	2024-07-02	58.7	0.005	0.21	0.76	2024-07-09	46.5	0.003	0.11	0.74	2024-07-16	70	0.01	0.07	0.7	2024-07-24	20.3	0.006	0.1	0.35	2024-07-29					2024-08-06					2024-08-13
C-29-143	Control	2024-06-11	101.5	0.117	0.68	0.79	2024-06-18	59.5	0.115	0.63	0.82	2024-06-25	43.6	0.008	0.3	0.8	2024-07-02	42.6	0.01	0.38	0.7	2024-07-09	17.1	0.002	0.09	0.71	2024-07-16	11.3	0.004	0.06	0.57	2024-07-24	10.7	0.006	0.22	0.53	2024-07-29	11.3	0.001	0.09	0.29	2024-08-06					2024-08-13
C-29-145	Control	2024-06-11	99.3	0.106	0.67	0.77	2024-06-18	70.7	0.07	0.67	0.8	2024-06-25	54.9	0.005	0.21	0.75	2024-07-02	65.5	0.005	0.29	0.75	2024-07-09	13	0.001	0.06	0.71	2024-07-16	9.5	0.006	0.07	0.68	2024-07-24	14.1	0.005	0.21	0.64	2024-07-29					2024-08-06					2024-08-13
C-32-159	Control	2024-06-11	90.5	0.085	0.53	0.77	2024-06-18	72.7	0.038	0.64	0.8	2024-06-25	70.1	0.004	0.57	0.77	2024-07-02	31.3	0.01	0.38	0.77	2024-07-09	8.2	0.006	0.15	0.76	2024-07-16	19.7	0	0.18	0.74	2024-07-24	14.7	0.002	0.08	0.7	2024-07-29	11.3	0.001	0.1	0.59	2024-08-06	12.4	0.005	0	0.17	2024-08-13	1.4	0
C-34-167	Control	2024-06-11	98.1	0.081	0.5	0.78	2024-06-18	81.7	0.033	0.6	0.79	2024-06-25	64.7	0.002	0.35	0.77	2024-07-02	12.3	0	0.19	0.75	2024-07-09	14	0	0.08	0.71	2024-07-16	9.3	0	0.07	0.54	2024-07-24	24.9	0	0	0.02	2024-07-29	0	0			2024-08-06					2024-08-13
C-35-172	Control	2024-06-11	85.6	0.093	0.63	0.8	2024-06-18	94	0.062	0.66	0.79	2024-06-25	92.1	0.024	0.32	0.79	2024-07-02	27.6	0.012	0.52	0.78	2024-07-09	40.9	0.004	0.34	0.82	2024-07-16	30.8	0	0.29	0.75	2024-07-24	20.9	0	0.08	0.64	2024-07-29	9.1	0	0.13	0.56	2024-08-06	21.1	0	0.1	0.46	2024-08-13
C-37-181	Control	2024-06-11	97.2	0.066	0.44	0.79	2024-06-18	69	0.004	0.63	0.78	2024-06-25	42.7	0.007	0.42	0.77	2024-07-02	17.5	0	0.12	0.75	2024-07-09	12.3	0.002	0.05	0.68	2024-07-16	20	0	0.08	0.61	2024-07-24	0	0			2024-07-29					2024-08-06					2024-08-13
C-39-192	Control	2024-06-11	80.3	0.127	0.6	0.71	2024-06-18	101.5	0.023	0.52	0.78	2024-06-25	54.8	0.039	0.44	0.76	2024-07-02	37.3	0.012	0.24	0.68	2024-07-09	15.8	0	0.13	0.7	2024-07-16	17	0	0.06	0.58	2024-07-24	0	0			2024-07-29					2024-08-06					2024-08-13
C-39-193	Control	2024-06-11	79	0.116	0.58	0.8	2024-06-18	77.5	0.023	0.62	0.78	2024-06-25	57.1	0.025	0.33	0.78	2024-07-02	31.9	0.003	0.19	0.76	2024-07-09	16.3	0.004	0.1	0.75	2024-07-16	8.2	0	0.2	0.6	2024-07-24	0	0			2024-07-29					2024-08-06					2024-08-13
C-39-195	Control	2024-06-11	71.2	0.128	0.57	0.8	2024-06-18	95.8	0.097	0.62	0.79	2024-06-25	43	0.038	0.47	0.81	2024-07-02	43	0.015	0.26	0.77	2024-07-09	14.2	0	0.14	0.77	2024-07-16	26.4	0	0.13	0.67	2024-07-24	10.6	0	0.1	0.64	2024-07-29	16.8	0	0.08	0.5	2024-08-06					2024-08-13
R-43-11	Rolling	2024-06-11	99.9	0.061	0.59	0.79	2024-06-18	82.6	0.058	0.55	0.8	2024-06-25	49	0.01	0.4	0.79	2024-07-02	66.9	0.013	0.3	0.76	2024-07-09	31	0	0.16	0.81	2024-07-16	22.2	0	0.02	0.79	2024-07-24	21.7	0	0.05	0.68	2024-07-29	10.2	0	0.15	0.61	2024-08-06	0	0.003	0.08	0.46	2024-08-13
R-45-25	Rolling	2024-06-11	84.9	0.098	0.55	0.78	2024-06-18	99.6	0.048	0.41	0.79	2024-06-25	52.9	0.058	0.55	0.79	2024-07-02	26.9	0.001	0.35	0.78	2024-07-09	16.9	0	0.3	0.81	2024-07-16	16.8	0	0.23	0.77	2024-07-24	24.1	0	0.07	0.56	2024-07-29	9.1	0.002	0.09	0.36	2024-08-06					2024-08-13
R-46-27	Rolling	2024-06-11	91.6	0.112	0.63	0.81	2024-06-18	89.9	0.076	0.68	0.8	2024-06-25	65	0.042	0.57	0.8	2024-07-02	68.6	0.04	0.56	0.81	2024-07-09	61.1	0.026	0.12	0.77	2024-07-16	60.9	0.001	0.1	0.63	2024-07-24	18.1	0.003	0.1	0.73	2024-07-29	0	0			2024-08-06					2024-08-13
R-46-29	Rolling	2024-06-11	101.6	0.1	0.6	0.79	2024-06-18	113.9	0.106	0.63	0.8	2024-06-25	103.4	0.042	0.48	0.8	2024-07-02	78.8	0.051	0.57	0.8	2024-07-09	14.3	0.04	0.3	0.78	2024-07-16	11.7	0.032	0.23	0.79	2024-07-24	0	0.003	0.16	0.76	2024-07-29	19.9	0.003	0.17	0.59	2024-08-06	0	0.001	0.11	0.61	2024-08-13	0	0
R-47-31	Rolling	2024-06-11	93.8	0.089	0.7	0.79	2024-06-18	75.9	0.055	0.59	0.79	2024-06-25	58.9	0.013	0.57	0.77	2024-07-02	53.6	0.013	0.3	0.76	2024-07-09	22.6	0	0.1	0.75	2024-07-16	26.9	0	0.1	0.67	2024-07-24	0	0	0	0	2024-07-29	0	0	0	0	2024-08-06					2024-08-13
R-48-36	Rolling	2024-06-11	85.9	0.076	0.56	0.81	2024-06-18	74.3	0.065	0.66	0.82	2024-06-25	92.8	0.0057	0.62	0.8	2024-07-02	58.2	0.02	0.53	0.8	2024-07-09	11.5	0.011	0.46	0.81	2024-07-16	15.6	0	0.42	0.8	2024-07-24	0.3	0.002	0.21	0.8	2024-07-29	12.8	0.004	0.26	0.76	2024-08-06	0	0.004	0.17	0.72	2024-08-13	9.2	0.002
R-49-43	Rolling	2024-06-11	89.2	0.091	0.61	0.79	2024-06-18	88.9	0.021	0.59	0.8	2024-06-25	64.1	0.001	0.33	0.78	2024-07-02	61.3	0.004	0.21	0.78	2024-07-09	16.2	0	0.05	0.69	2024-07-16	12.1	0	0.1	0.64	2024-07-24	0	0	0.01	0.13	2024-07-29	0	0			2024-08-06					2024-08-13
R-50-47	Rolling	2024-06-11	67.6	0.077	0.59	0.79	2024-06-18	92.7	0.062	0.65	0.8	2024-06-25	101.9	0.026	0.57	0.78	2024-07-02	84.7	0.023	0.52	0.78	2024-07-09	28.4	0.011	0.13	0.67	2024-07-16	27.5	0.001	0.16	0.72	2024-07-24	18.6	0	0.1	0.6	2024-07-29	14.7	0	0.12	0.45	2024-08-06	0	0.002	0	0.25	2024-08-13
R-50-49	Rolling	2024-06-11	88	0.067	0.56	0.8	2024-06-18	91.8	0.035	0.55	0.78	2024-06-25	84.5	0.007	0.48	0.77	2024-07-02	79.3	0.012	0.34	0.77	2024-07-09	19.3	0	0.09	0.78	2024-07-16	21.6	0	0.13	0.72	2024-07-24	13.7	0.011	0.08	0.71	2024-07-29	16.4	0	0.13	0.51	2024-08-06	12.1	0	0	0.05	2024-08-13
R-50-50	Rolling	2024-06-11	95.6	0.082	0.6	0.7	2024-06-18	82.5	0.032	0.55	0.78	2024-06-25	67.2	0.003	0.32	0.79	2024-07-02	54.7	0.012	0.29	0.76	2024-07-09	12.4	0.003	0.05	0.63	2024-07-16	17.3	0	0	0.44	2024-07-24	9.4	0.001	0	0.04	2024-07-29					2024-08-06					2024-08-13
R-51-54	Rolling	2024-06-11	100	0.107	0.76	0.8	2024-06-18	89.6	0.075	0.51	0.78	2024-06-25	72.2	0.042	0.51	0.8	2024-07-02	52.1	0	0.32	0.79	2024-07-09	43	0.004	0.13	0.78	2024-07-16	32.8	0	0.52	0.77	2024-07-24	14.1	0.006	0.11	0.65	2024-07-29	1.3	0	0.18	0.61	2024-08-06	8.9	0.001	0	0.03	2024-08-13	0	0
R-51-55	Rolling	2024-06-11	98.8	0.123	0.71	0.78	2024-06-18	79.3	0.042	0.55	0.78	2024-06-25	65.5	0.042	0.51	0.8	2024-07-02	47.3	0.01	0.25	0.76	2024-07-09	18.6	0.009	0.12	0.77	2024-07-16	66.7	0.006	0.23	0.7	2024-07-24	30.5	0.009	0.13	0.53	2024-07-29	18.7	0	0.012	0.35	2024-08-06	7.6	0	0	0.02	2024-08-13	0	0
R-52-59	Rolling	2024-06-11	88.4	0.083	0.7	0.8	2024-06-18	83.6	0.062	0.68	0.78	2024-06-25	42.9	0.062	0.59	0.78	2024-07-02	46.2	0.026	0.67	0.78	2024-07-09	18.8	0.003	0.46	0.82	2024-07-16	15.3	0.006	0.18	0.78	2024-07-24	20.5	0.005	0.2	0.76	2024-07-29	11.8	0.002	0.21	0.6	2024-08-06	2	0.005	0.11	0.61	2024-08-13	0	0
R-53-65	Rolling	2024-06-11	96	0.145	0.62	0.79	2024-06-18	77.5	0.066	0.49	0.79	2024-06-25	73.5	0.015	0.31	0.77	2024-07-02	37	0.002	0.26	0.76	2024-07-09	6.7	0	0.07	0.72	2024-07-16	7.4	0.001	0.03	0.61	2024-07-24	5.5	0.005	0.11	0.38	2024-07-29					2024-08-06					2024-08-13
R-54-68	Rolling	2024-06-11	115.9	0.102	0.52	0.77	2024-06-18	101.4	0.056	0.63	0.78	2024-06-25	64.6	0.035	0.56	0.8	2024-07-02	28.1	0	0.25	0.76	2024-07-09	10.7	0.003	0.08	0.74	2024-07-16	33	0.005	0.05	0.666	2024-07-24	11.3	0.003	0.02	0.14	2024-07-29	0	0			2024-08-06					2024-08-13
R-56-77	Rolling	2024-06-11	95.1	0.112	0.68	0.8	2024-06-18	61.7	0.109	0.6	0.79	2024-06-25	87.4	0.022	0.53	0.78	2024-07-02	54.3	0.006	0.28	0.78	2024-07-09	11.1	0.002	0.09	0.73	2024-07-16	3.6	0.004	0.11	0.68	2024-07-24	14.1	0.003	0.23	0.57	2024-07-29	12.6	0.003	0.14	0.55	2024-08-06	0.4	0	0.04	0.15	2024-08-13	0	0
R-57-82	Rolling	2024-06-11	87.1	0.079	0.65	0.8	2024-06-18	50.3	0.014	0.59	0.76	2024-06-25	43.2	0	0.34	0.75	2024-07-02	37.7	0.011	0.31	0.77	2024-07-09	65.3	0	0.11	0.75	2024-07-16	53.7	0	0.05	0.68	2024-07-24	30	0.001	0.1	0.61	2024-07-29	33.1	0.002	0.12	0.42	2024-08-06	13	0.003	0	0.01	2024-08-13	0	0
R-57-83	Rolling	2024-06-11	72.8	0.088	0.61	0.8	2024-06-18	72.5	0.054	0.61	0.67	2024-06-25	51	0.002	0.48	0.7	2024-07-02	27.8	0.01	0.31	0.76	2024-07-09	15.4	0.002	0.09	0.75	2024-07-16	5.7	0.006	0.08	0.68	2024-07-24	13.8	0	0.09	0.52	2024-07-29	0	0			2024-08-06					2024-08-13
R-57-85	Rolling	2024-06-11	101.4	0.065	0.65	0.8	2024-06-18	88.5	0.056	0.62	0.78	2024-06-25	30.9	0.002	0.31	0.78	2024-07-02	45.9	0.037	0.21	0.67	2024-07-09	12.9	0.001	0.05	0.67	2024-07-16	10.4	0.004	0.1	0.47	2024-07-24	0	0			2024-07-29	0	0			2024-08-06					2024-08-13
R-58-86	Rolling	2024-06-11	71	0.102	0.64	0.8	2024-06-18	100.9	0.067	0.63	0.75	2024-06-25	63.9	0	0.69	0.78	2024-07-02	46.6	0.01	0.3	0.74	2024-07-09	5.2	0	0.16	0.68	2024-07-16	10.4	0	0.06	0.63	2024-07-24	13.2	0	0.04	0.12	2024-07-29	0	0			2024-08-06					2024-08-13
R-58-87	Rolling	2024-06-11	95.6	0.084	0.65	0.8	2024-06-18	100	0.039	0.63	0.8	2024-06-25	85.7	0.008	0.6	0.78	2024-07-02	43.2	0.01	0.26	0.73	2024-07-09	19.2	0.007	0.2	0.74	2024-07-16	7.1	0	0.16	0.53	2024-07-24	5.6	0	0.21	0.57	2024-07-29	14.3	0.003	0.09	0.37	2024-08-06	0	0			2024-08-13
R-58-90	Rolling	2024-06-11	93.4	0.129	0.59	0.78	2024-06-18	75	0.075	0.6	0.74	2024-06-25	85	0.007	0.54	0.73	2024-07-02	35.5	0.017	0.44	0.76	2024-07-09	27.2	0.001	0.09	0.66	2024-07-16	18.5	0	0.12	0.63	2024-07-24	0	0	0	0	2024-07-29	0	0			2024-08-06					2024-08-13
R-60-97	Rolling	2024-06-11	107.5	0.128	0.57	0.75	2024-06-18	92.3	0.08	0.53	0.78	2024-06-25	76.2	0.023	0.59	0.77	2024-07-02	53.6	0.005	0.46	0.79	2024-07-09	16.3	0.004	0.4	0.77	2024-07-16	7.2	0	0.39	0.74	2024-07-24	17.1	0.001	0.08	0.71	2024-07-29	25.1	0.001	0.12	0.56	2024-08-06	0	0.003	0	0.55	2024-08-13	16.2	0
R-60-98	Rolling	2024-06-11	96.9	0.06	0.63	0.76	2024-06-18	76.1	0.069	0.64	0.77	2024-06-25	78	0.021	0.58	0.79	2024-07-02	58.2	0.009	0.56	0.8	2024-07-09	47.4	0	0.48	0.82	2024-07-16	48.1	0	0.32	0.79	2024-07-24	13.2	0	0.14	0.78	2024-07-29	13.9	0.001	0.14	0.6	2024-08-06	0	0	0.09	0.58	2024-08-13	1.5	0.002
R-60-99	Rolling	2024-06-11	105.1	0.113	0.61	0.79	2024-06-18	96.9	0.053	0.63	0.78	2024-06-25	80.2	0.006	0.51	0.8	2024-07-02	69.9	0	0.44	0.77	2024-07-09	58.5	0	0.26	0.76	2024-07-16	42.1	0	0.13	0.6	2024-07-24	22.3	0.003	0.11	0.6	2024-07-29	16.3	0.001	0.13	0.51	2024-08-06	0	0.001			2024-08-13	0	0
D-62-08	Deposit	2024-06-11	89.5	0.094	0.48	0.78	2024-06-18	86.9	0.036	0.54	0.8	2024-06-25	52.8	0.032	0.37	0.8	2024-07-02	44.5	0.003	0.37	0.79	2024-07-09	47.1	0	0.44	0.67	2024-07-16	39	0	0.31	0.78	2024-07-24	1.6	0.002	0.11	0.08	2024-07-29	4.9	0	0.09	0.64	2024-08-06	11.9	0	0.11	0.59	2024-08-13	1.7	0
D-63-15	Deposit	2024-06-11	83.6	0.156	0.69	0.8	2024-06-18	80.4	0.118	0.64	0.81	2024-06-25	51.7	0.01	0.36	0.82	2024-07-02	62.1	0.034	0.37	0.81	2024-07-09	25.3	0.003	0.12	0.75	2024-07-16	25.6	0	0.12	0.64	2024-07-24	14.8	0.005	0.13	0.5	2024-07-29	0	0			2024-08-06					2024-08-13
D-64-16	Deposit	2024-06-11	80.7	0.167	0.63	0.81	2024-06-18	94.9	0.058	0.57	0.79	2024-06-25	55.2	0	0.3	0.78	2024-07-02	85	0.029	0.45	0.75	2024-07-09	12.6	0	0.11	0.75	2024-07-16	21.8	0.004	0.09	0.67	2024-07-24	14.6	0.002	0.07	0.36	2024-07-29	0	0			2024-08-06					2024-08-13
D-64-19	Deposit	2024-06-11	89.5	0.126	0.62	0.81	2024-06-18	77.6	0.029	0.6	0.8	2024-06-25	47.2	0.002	0.29	0.8	2024-07-02	69.7	0.026	0.35	0.79	2024-07-09	14.8	0.002	0.06	0.62	2024-07-16	13.9	0.005	0.08	0.58	2024-07-24	13.7	0.003	0.12	0.22	2024-07-29	0	0			2024-08-06					2024-08-13
D-65-22	Deposit	2024-06-11	75.2	0.075	0.57	0.73	2024-06-18	71.3	0.032	0.55	0.76	2024-06-25	36	0.011	0.47	0.78	2024-07-02	22.2	0.001	0.33	0.76	2024-07-09	6.3	0	0.11	0.74	2024-07-16	37.7	0	0.05	0.65	2024-07-24	4.9	0	0.01	0.39	2024-07-29	0	0			2024-08-06					2024-08-13
D-65-25	Deposit	2024-06-11	105.1	0.071	0.61	0.8	2024-06-18	82.9	0.01	0.47	0.78	2024-06-25	64.6	0.006	0.24	0.79	2024-07-02	45.7	0	0.12	0.71	2024-07-09	10.4	0	0.16	0.57	2024-07-16	5.3	0	0.01	0	2024-07-24					2024-07-29					2024-08-06					2024-08-13
D-66-28	Deposit	2024-06-11	98	0.079	0.63	0.78	2024-06-18	82.5	0.057	0.42	0.78	2024-06-25	114.9	0.013	0.27	0.79	2024-07-02	97.9	0.005	0.29	0.76	2024-07-09	56.2	0	0.09	0.62	2024-07-16	72.6	0.003	0.09	0.44	2024-07-24	0	0			2024-07-29					2024-08-06					2024-08-13
D-67-31	Deposit	2024-06-11	92.7	0.083	0.59	0.79	2024-06-18	62.6	0.03	0.48	0.69	2024-06-25	29.5	0.008	0.51	0.79	2024-07-02	16.3	0.004	0.2	0.75	2024-07-09	13.5	0	0.09	0.58	2024-07-16	2.6	0	0.09	0.44	2024-07-24	0	0			2024-07-29					2024-08-06					2024-08-13
D-67-35	Deposit	2024-06-11	88.8	0.061	0.88	0.78	2024-06-18	69.4	0.032	0.6	0.78	2024-06-25	63.4	0.017	0.49	0.79	2024-07-02	19.9	0.003	0.56	0.77	2024-07-09	20.5	0	0.14	0.7	2024-07-16	11.4	0	0.06	0.64	2024-07-24	0	0			2024-07-29					2024-08-06					2024-08-13
D-69-42	Deposit	2024-06-11	89.2	0.117	0.41	0.81	2024-06-18	78	0.039	0.6	0.78	2024-06-25	80.5	0.009	0.37	0.79	2024-07-02	71.4	0.034	0.44	0.79	2024-07-09	24.3	0	0.13	0.69	2024-07-16	7.3	0.001	0.11	0.63	2024-07-24	0	0			2024-07-29					2024-08-06					2024-08-13
D-70-47	Deposit	2024-06-11	105.2	0.074	0.63	0.78	2024-06-18	93.2	0.052	0.59	0.78	2024-06-25	77.5	0.011	0.62	0.78	2024-07-02	59.8	0	0.29	0.77	2024-07-09	15.1	0	0.14	0.77	2024-07-16	10.2	0	0.09	0.72	2024-07-24	13.5	0.001	0.22	0.6	2024-07-29	0	0			2024-08-06					2024-08-13
D-70-50	Deposit	2024-06-11	92.1	0.101	0.68	0.8	2024-06-18	86.8	0.085	0.62	0.78	2024-06-25	88.4	0.035	0.59	0.79	2024-07-02	37.9	0.007	0.51	0.77	2024-07-09	19.4	0	0.25	0.8	2024-07-16	12.8	0	0.16	0.78	2024-07-24	9.5	0.001	0.15	0.31	2024-07-29	0	0			2024-08-06					2024-08-13
D-71-53	Deposit	2024-06-11	99	0.073	0.61	0.8	2024-06-18	71.5	0.032	0.35	0.78	2024-06-25	38.3	0.005	0.24	0.67	2024-07-02	11.2	0.004	0.15	0.76	2024-07-09	7.3	0.003	0.08	0.62	2024-07-16	1.5	0	0.3	0.4	2024-07-24					2024-07-29					2024-08-06					2024-08-13
D-72-58	Deposit	2024-06-11	107.4	0.074	0.6	0.78	2024-06-18	85.7	0.045	0.67	0.78	2024-06-25	58	0.017	0.58	0.78	2024-07-02	78.1	0.001	0.43	0.77	2024-07-09	41.3	0.001	0.1	0.75	2024-07-16	23.6	0	0.08	0.67	2024-07-24	0	0			2024-07-29	0	0			2024-08-06					2024-08-13
D-73-62	Deposit	2024-06-11	90	0.079	0.71	0.78	2024-06-18	56.4	0.038	0.74	0.78	2024-06-25	44.7	0.02	0.43	0.79	2024-07-02	21.4	0.002	0.44	0.79	2024-07-09	14.9	0	0.1	0.76	2024-07-16	10.6	0	0.07	0.69	2024-07-24	13.4	0.002	0.13	0.4	2024-07-29	0	0			2024-08-06					2024-08-13
D-75-71	Deposit	2024-06-11	86	0.065	0.55	0.78	2024-06-18	80.5	0.034	0.47	0.78	2024-06-25	64.6	0.02	0.2	0.75	2024-07-02	34.4	0.011	0.08	0.69	2024-07-09	10	0.009	0.08	0.5	2024-07-16	4	0			2024-07-24					2024-07-29					2024-08-06					2024-08-13
D-75-72	Deposit	2024-06-11	82.8	0.086	0.61	0.81	2024-06-18	66.2	0.076	0.56	0.77	2024-06-25	63.2	0.002	0.44	0.77	2024-07-02	22.7	0	0.23	0.78	2024-07-09	10.6	0.006	0.13	0.69	2024-07-16	0.9	0	0.1	0.61	2024-07-24	0	0			2024-07-29					2024-08-06					2024-08-13
D-76-80	Deposit	2024-06-11	100.1	0.135	0.61	0.8	2024-06-18	70.2	0.081	0.58	0.76	2024-06-25	75.3	0.004	0.4	0.79	2024-07-02	81.1	0.031	0.43	0.78	2024-07-09	15.4	0	0.11	0.62	2024-07-16	9.5	0.002	0.06	0.65	2024-07-24	21	0.005	0.1	0.43	2024-07-29	0	0			2024-08-06					2024-08-13
D-77-82	Deposit	2024-06-11	91.3	0.049	0.5	0.8	2024-06-18	81.3	0.075	0.58	0.75	2024-06-25	44.9	0.018	0.57	0.77	2024-07-02	31.9	0.014	0.5	0.78	2024-07-09	50.2	0	0.12	0.77	2024-07-16	49.1	0.003	0.12	0.75	2024-07-24	16.6	0.002	0.11	0.65	2024-07-29	27	0.004	0.09	0.45	2024-08-06	20.1	0.001	0.09	0.27	2024-08-13	0	0
D-78-86	Deposit	2024-06-11	96.2	0.078	0.67	0.77	2024-06-18	89.5	0.052	0.62	0.71	2024-06-25	68.4	0.015	0.55	0.78	2024-07-02	70.2	0	0.72	0.74	2024-07-09	8.9	0	0.17	0.7	2024-07-16	6.8	0	0.06	0.59	2024-07-24	0	0			2024-07-29					2024-08-06					2024-08-13
D-78-88	Deposit	2024-06-11	70.3	0.059	0.58	0.79	2024-06-18	95.9	0.037	0.62	0.71	2024-06-25	53.3	0.006	0.48	0.79	2024-07-02	47.9	0	0.72	0.74	2024-07-09	19	0.004	0.1	0.75	2024-07-16	12.6	0	0.06	0.52	2024-07-24	8.1	0.001	0.13	0.39	2024-07-29	0	0			2024-08-06					2024-08-13
D-78-90	Deposit	2024-06-11	91	0.072	0.56	0.79	2024-06-18	101.5	0.037	0.53	0.78	2024-06-25	77.1	0.018	0.28	0.79	2024-07-02	37.5	0	0.31	0.78	2024-07-09	13.4	0	0.13	0.77	2024-07-16	7.7	0	0.12	0.77	2024-07-24	15.7	0	0.02	0.52	2024-07-29	1	0	0.05	0.13	2024-08-06	0	0			2024-08-13
D-79-93	Deposit	2024-06-11	92.5	0.116	0.52	0.81	2024-06-18	71.5	0.068	0.61	0.79	2024-06-25	82.6	0.019	0.29	0.75	2024-07-02	77.7	0.023	0.34	0.72	2024-07-09	13	0.009	0.1	0.72	2024-07-16	16.9	0.007	0.11	0.53	2024-07-24	11.4	0.004	0.08	0.3	2024-07-29	0	0			2024-08-06					2024-08-13
D-79-94	Deposit	2024-06-11	82	0.1	0.7	0.82	2024-06-18	73.3	0.024	0.62	0.82	2024-06-25	45.1	0.017	0.46	0.8	2024-07-02	36.7	0.034	0.63	0.81	2024-07-09	13.1	0.002	0.24	0.78	2024-07-16	14	0.002	0.09	0.74	2024-07-24	5.4	0	0.01	0.11	2024-07-29					2024-08-06					2024-08-13
D-80-98	Deposit	2024-06-11	95.7	0.074	0.48	0.77	2024-06-18	92.6	0.053	0.46	0.74	2024-06-25	72.3	0.016	0.26	0.73	2024-07-02	74.2	0.007	0.16	0.76	2024-07-09	16.6	0.009	0.07	0.76	2024-07-16	2.2	0	0.06	0.6	2024-07-24	13.5	0.022	0.12	0.42	2024-07-29	0	0			2024-08-06	0	0			2024-08-13
M-81-02	Mixed	2024-06-11	94.7	0.102	0.64	0.81	2024-06-18	89.7	0.082	0.64	0.78	2024-06-25	30.5	0.016	0.54	0.8	2024-07-02	31.6	0.01	0.57	0.77	2024-07-09	12	0	0.22	0.73	2024-07-16	8.8	0	0.18	0.71	2024-07-24	12.7	0.011	0	0.03	2024-07-29	0	0			2024-08-06					2024-08-13
M-81-03	Mixed	2024-06-11	96.8	0.049	0.71	0.8	2024-06-18	78.9	0.061	0.67	0.8	2024-06-25	78.3	0.08	0.68	0.8	2024-07-02	63.4	0.061	0.6	0.81	2024-07-09	24.8	0.001	0.47	0.8	2024-07-16	17.3	0.009	0.59	0.8	2024-07-24	7.1	0.003	0.43	0.79	2024-07-29	17.4	0	0.24	0.75	2024-08-06	10.4	0	0.18	0.69	2024-08-13	0	0
M-82-06	Mixed	2024-06-11	89.4	0.115	0.6	0.79	2024-06-18	99.4	0.08	0.67	0.8	2024-06-25	71.9	0.022	0.62	0.81	2024-07-02	85.9	0.04	0.53	0.8	2024-07-09	29.9	0	0.14	0.79	2024-07-16	49.7	0	0.08	0.75	2024-07-24	13.8	0	0.12	0.61	2024-07-29	17.1	0	0.1	0.44	2024-08-06					2024-08-13
M-82-07	Mixed	2024-06-11	100.7	0.116	0.59	0.81	2024-06-18	82.1	0.073	0.65	0.79	2024-06-25	94.4	0.031	0.47	0.82	2024-07-02	68.2	0.041	0.54	0.82	2024-07-09	21	0	0.09	0.78	2024-07-16	11.5	0.003	0.17	0.74	2024-07-24	12.3	0	0.13	0.73	2024-07-29	11.1	0.001	0.18	0.52	2024-08-06	0	0			2024-08-13
M-83-12	Mixed	2024-06-11	98.7	0.108	0.62	0.8	2024-06-18	88.8	0.088	0.66	0.76	2024-06-25	68.2	0.005	0.41	0.82	2024-07-02	61.5	0.044	0.5	0.79	2024-07-09	7.6	0	0.1	0.76	2024-07-16	10.2	0.006	0.09	0.64	2024-07-24	0	0			2024-07-29					2024-08-06					2024-08-13
M-83-14	Mixed	2024-06-11	96	0.121	0.65	0.78	2024-06-18	86.5	0.089	0.68	0.74	2024-06-25	42.4	0.034	0.66	0.81	2024-07-02	56.6	0.059	0.51	0.82	2024-07-09	49.8	0.004	0.3	0.77	2024-07-16	11.5	0.005	0.35	0.78	2024-07-24	46	0.004	0.15	0.74	2024-07-29	28.7	0.002	0.17	0.67	2024-08-06	6.2	0	0	0.38	2024-08-13	0	0
M-83-15	Mixed	2024-06-11	94.3	0.115	0.57	0.81	2024-06-18	109.1	0.093	0.6	0.75	2024-06-25	97.5	0.004	0.48	0.81	2024-07-02	58.1	0.046	0.63	0.81	2024-07-09	40.9	0.002	0.27	0.75	2024-07-16	44.1	0.003	0.16	0.77	2024-07-24	16	0.004	0.12	0.71	2024-07-29					2024-08-06					2024-08-13
M-84-16	Mixed	2024-06-11	95.1	0.136	0.69	0.77	2024-06-18	82.4	0.083	0.71	0.78	2024-06-25	53.9	0.021	0.48	0.8	2024-07-02	65.2	0.012	0.57	0.79	2024-07-09	9.8	0	0.12	0.77	2024-07-16	19.5	0.004	0.09	0.71	2024-07-24	9.8	0	0.15	0.57	2024-07-29	10.7	0.004	0.03	0.51	2024-08-06					2024-08-13
M-84-18	Mixed	2024-06-11	96.5	0.122	0.63	0.77	2024-06-18	83.8	0.105	0.69	0.81	2024-06-25	79	0.022	0.39	0.81	2024-07-02	84.4	0.016	0.44	0.81	2024-07-09	18.9	0.004	0.22	0.78	2024-07-16	14.3	0.003	0.31	0.78	2024-07-24	19.4	0	0.1	0.68	2024-07-29	3.1	0	0.14	0.63	2024-08-06	5.4	0			2024-08-13	5.1	0
M-85-22	Mixed	2024-06-11	94.8	0.142	0.66	0.8	2024-06-18	76.8	0.071	0.71	0.82	2024-06-25	57.1	0.013	0.33	0.82	2024-07-02	49.7	0.004	0.38	0.8	2024-07-09	22.2	0	0.07	0.7	2024-07-16	27.6	0.002	0.16	0.51	2024-07-24	0	0			2024-07-29					2024-08-06					2024-08-13
M-85-25	Mixed	2024-06-11	88.4	0.101	0.57	0.78	2024-06-18	84.3	0.084	0.68	0.81	2024-06-25	39.5	0.048	0.6	0.8	2024-07-02	54.1	0.005	0.21	0.76	2024-07-09	11.5	0	0.09	0.74	2024-07-16	23.2	0.002	0.06	0.73	2024-07-24	11.5	0.007	0	0.03	2024-07-29	0	0			2024-08-06					2024-08-13
M-87-33	Mixed	2024-06-11	85	0.114	0.55	0.78	2024-06-18	83.5	0.062	0.69	0.81	2024-06-25	39.6	0.057	0.65	0.79	2024-07-02	68.3	0.036	0.66	0.82	2024-07-09	9.7	0.002	0.52	0.81	2024-07-16	7.2	0.011	0.48	0.81	2024-07-24	1.9	0.007	0.19	0.76	2024-07-29	14.7	0	0.11	0.69	2024-08-06	10.1	0	0.13	0.64	2024-08-13	10.1	0.001
M-88-40	Mixed	2024-06-11	89.7	0.06	0.68	0.82	2024-06-18	73.6	0.048	0.6	0.78	2024-06-25	61.6	0.018	0.65	0.78	2024-07-02	43.7	0.02	0.45	0.77	2024-07-09	14.4	0	0.19	0.78	2024-07-16	11.3	0.006	0.22	0.78	2024-07-24	15.9	0.001	0.15	0.78	2024-07-29	12.2	0.002	0.08	0.71	2024-08-06	11.7	0.005	0.1	0.56	2024-08-13	13.3	0.002
M-90-47	Mixed	2024-06-11	85.4	0.113	0.67	0.77	2024-06-18	74.8	0.075	0.69	0.78	2024-06-25	67	0.023	0.7	0.79	2024-07-02	87.8	0.026	0.61	0.82	2024-07-09	33.7	0	0.21	0.8	2024-07-16	15.6	0.007	0.19	0.79	2024-07-24	10.7	0.004	0.14	0.76	2024-07-29	16	0.001	0.19	0.52	2024-08-06					2024-08-13
M-91-51	Mixed	2024-06-11	85.4	0.083	0.64	0.76	2024-06-18	88.9	0.039	0.58	0.81	2024-06-25	18.7	0.022	0.49	0.79	2024-07-02	57.4	0.005	0.25	0.8	2024-07-09	9.8	0.01	0.14	0.8	2024-07-16	19.5	0.004	0.12	0.6	2024-07-24	16.9	0.003	0.06	0.25	2024-07-29	0	0			2024-08-06					2024-08-13
M-92-56	Mixed	2024-06-11	93.3	0.103	0.56	0.82	2024-06-18	81.7	0.055	0.7	0.8	2024-06-25	89.5	0.027	0.61	0.79	2024-07-02	57.3	0.02	0.45	0.78	2024-07-09	17.9	0.007	0.27	0.76	2024-07-16	15	0	0.2	0.69	2024-07-24	6	0	0.09	0.76	2024-07-29	9.7	0.003	0.09	0.62	2024-08-06	16.4	0	0.1	0.56	2024-08-13	0	0
M-92-57	Mixed	2024-06-11	70.3	0.073	0.51	0.76	2024-06-18	61.1	0.033	0.66	0.72	2024-06-25	80.9	0.013	0.47	0.75	2024-07-02	57.1	0.018	0.46	0.75	2024-07-09	37.5	0.001	0.24	0.79	2024-07-16	24.4	0	0.14	0.73	2024-07-24	11.5	0.001	0.12	0.62	2024-07-29	18.8	0.006	0.07	0.54	2024-08-06					2024-08-13
M-93-61	Mixed	2024-06-11	91.3	0.069	0.71	0.79	2024-06-18	87.7	0.017	0.41	0.81	2024-06-25	109.4	0.005	0.21	0.74	2024-07-02	31.5	0.011	0.3	0.75	2024-07-09	8	0	0.09	0.7	2024-07-16	5.2	0	0.07	0.54	2024-07-24	5	0.002	0.05	0.44	2024-07-29	0	0			2024-08-06					2024-08-13
M-94-67	Mixed	2024-06-11	76.2	0.046	0.6	0.79	2024-06-18	92.3	0.046	0.63	0.77	2024-06-25	72.4	0.05	0.5	0.75	2024-07-02	36.1	0	0.54	0.8	2024-07-09	69.2	0.002	0.35	0.8	2024-07-16	31.1	0.004	0.42	0.77	2024-07-24	23.6	0.001	0.33	0.79	2024-07-29	21.8	0.003	0.2	0.75	2024-08-06	0	0	0.13	0.54	2024-08-13	0	0
M-94-69	Mixed	2024-06-11	80.3	0.064	0.76	0.8	2024-06-18	89.8	0.026	0.7	0.74	2024-06-25	55.6	0.026	0.6	0.77	2024-07-02	72.4	0.003	0.28	0.79	2024-07-09	50.9	0.001	0.21	0.79	2024-07-16	59.2	0	0.21	0.72	2024-07-24	23.3	0.002	0.14	0.68	2024-07-29	21	0	0.17	0.47	2024-08-06	18	0	0	0.3	2024-08-13	6	0
M-95-71	Mixed	2024-06-11	99.6	0.077	0.66	0.76	2024-06-18	88.5	0.051	0.63	0.81	2024-06-25	27.5	0.01	0.49	0.81	2024-07-02	55.6	0.031	0.57	0.8	2024-07-09	15.9	0	0.16	0.78	2024-07-16	14	0.002	0.2	0.78	2024-07-24	22.4	0.006	0.12	0.76	2024-07-29	19.5	0.002	0.17	0.66	2024-08-06	0	0	0.11	0.58	2024-08-13	7.1	0.003
M-96-76	Mixed	2024-06-11	90.7	0.122	0.73	0.8	2024-06-18	66.7	0.059	0.71	0.8	2024-06-25	80.3	0.055	0.6	0.82	2024-07-02	65.1	0.044	0.68	0.83	2024-07-09	32.5	0	0.5	0.8	2024-07-16	18.7	0.009	0.51	0.82	2024-07-24	8.6	0.003	0.48	0.8	2024-07-29	21.5	0.001	0.25	0.68	2024-08-06	0	0.003	0.23	0.58	2024-08-13	0	0
M-97-84	Mixed	2024-06-11	92	0.109	0.47	0.8	2024-06-18	81.6	0.059	0.71	0.8	2024-06-25	55.8	0.003	0.35	0.8	2024-07-02	58.3	0.034	0.56	0.75	2024-07-09	39.3	0	0.19	0.7	2024-07-16	27.9	0.002	0.01	0.71	2024-07-24	7.3	0	0.17	0.64	2024-07-29	0	0			2024-08-06					2024-08-13
M-98-88	Mixed	2024-06-11	68.5	0.097	0.66	0.8	2024-06-18	85.5	0.085	0.68	0.78	2024-06-25	86.4	0.039	0.62	0.79	2024-07-02	58.9	0.025	0.47	0.79	2024-07-09	9	0.011	0.34	0.81	2024-07-16	15.3	0.002	0.4	0.77	2024-07-24	18	0.002	0.13	0.68	2024-07-29	10.3	0.004	0.09	0.55	2024-08-06	9	0.003	0.1	0.32	2024-08-13	0	0
M-99-94	Mixed	2024-06-11	92.2	0.09	0.68	0.81	2024-06-18	60.3	0.013	0.65	0.83	2024-06-25	61.6	0.009	0.32	0.81	2024-07-02	39.2	0.002	0.2	0.8	2024-07-09	14.3	0	0.11	0.76	2024-07-16	12	0	0.12	0.7	2024-07-24	2.2	0	0.1	0.65	2024-07-29	0	0			2024-08-06					2024-08-13
[truncated: 12 more columns]

## Sheet: metadata
Variable	Description	Unit	Precision	Census/Subset	Frequency	Tools Used	Datatype
week_dead	The week in which the seedling was considered dead	Weeks	Whole number week	N/A	N/A	N/A	Number			Note: The week of the measurement is represented by the number next to the variable. For example, ht_02 denotes the height of the seedling taken during Week 2 of the experiment. Week 0 represents the measurements taken right before initiating the drought.
treatment	Describes how the polymer treatment was applied to the seedling. The four groups are the Control, Deposit, Rolling, and Mixed.	N/A	N/A	N/A	N/A	N/A	Factor
date	The month and day the measurements were taken, denoted as "date_(week)". All measurements were taken in 2024.	Time	N/A	N/A	N/A	N/A	Date
surv	"0" indicates the seedling was still alive at the week of measurements, and "1" indicates that the seedling was considered dead.	Unitless	N/A	Census	Weekly	N/A	Number
ht	The height of the seedling.	cm	0.5	Census	Bi-weekly	Meter stick	Number
diam	The diameter of the seedling's stem at a predetermined point.	mm	0.01	Census	Bi-weekly	Electronic Calipers	Number
etr	The measurement for the electron transport rate (ETR).	mmol m-2 s-1	0.1	Subset	Weekly	Li-Cor LI-600N	Number
gs	Stomatal conductance (gs) taken during midday light levels.	mol m-2 s-1	0.001	Subset	Weekly	Li-Cor LI-600N	Number
ps2	The operating efficiency of Photosystem II (denoted in the paper as ΦPSII) measurement taken during midday light levels.	Unitless	0.01	Subset	Weekly	Li-Cor LI-600N	Number
fvfm	The optimal efficiency of Photosystem II (denoted in the paper as Fv/Fm) measurement taken after dark-adaption.	Unitless	0.01	Subset	Weekly	Li-Cor LI-600N	Number
